# Supplementary material for: Safety and impact of eculizumab withdrawal in patients with atypical haemolytic uraemic syndrome: protocol for a multicentre, open-label, prospective, single-arm study
Source: PubMed Central journal article supplement (PMC9486193; doi:10.1136/bmjopen-2021-054536), 2022-09-19
Supplement: bmjopen-2021-054536.draft_revisions.pdf [file bmjopen-2021-054536.draft_revisions.pdf]

# BMJ Open

BMJ Open is committed to open peer review. As part of this commitment we make the peer review history of every article we publish publicly available.

When an article is published we post the peer reviewers' comments and the authors' responses online. We also post the versions of the paper that were used during peer review. These are the versions that the peer review comments apply to.

The versions of the paper that follow are the versions that were submitted during the peer review process. They are not the versions of record or the final published versions. They should not be cited or distributed as the published version of this manuscript.

BMJ Open is an open access journal and the full, final, typeset and author-corrected version of record of the manuscript is available on our site with no access controls, subscription charges or pay-per-view fees (<http://bmjopen.bmj.com>).

If you have any questions on BMJ Open's open peer review process please email [info.bmjopen@bmj.com](mailto:info.bmjopen@bmj.com)

# BMJ Open

## Protocol for a multicentre, open label, prospective, single arm study of the safety and impact of eculizumab withdrawal in patients with atypical haemolytic uraemic syndrome

|                               |                                                                                                                                                                                                                                                                                                                                                                                                                                                                                                                                                                                                                                                                                                                                                                                                                                                                                                                                                                                                                                                                                                                                                                                                                                                                                                                                                                                                                                                                                                                                                                                                                                          |
|-------------------------------|------------------------------------------------------------------------------------------------------------------------------------------------------------------------------------------------------------------------------------------------------------------------------------------------------------------------------------------------------------------------------------------------------------------------------------------------------------------------------------------------------------------------------------------------------------------------------------------------------------------------------------------------------------------------------------------------------------------------------------------------------------------------------------------------------------------------------------------------------------------------------------------------------------------------------------------------------------------------------------------------------------------------------------------------------------------------------------------------------------------------------------------------------------------------------------------------------------------------------------------------------------------------------------------------------------------------------------------------------------------------------------------------------------------------------------------------------------------------------------------------------------------------------------------------------------------------------------------------------------------------------------------|
| Journal:                      | <i>BMJ Open</i>                                                                                                                                                                                                                                                                                                                                                                                                                                                                                                                                                                                                                                                                                                                                                                                                                                                                                                                                                                                                                                                                                                                                                                                                                                                                                                                                                                                                                                                                                                                                                                                                                          |
| Manuscript ID                 | bmjopen-2021-054536                                                                                                                                                                                                                                                                                                                                                                                                                                                                                                                                                                                                                                                                                                                                                                                                                                                                                                                                                                                                                                                                                                                                                                                                                                                                                                                                                                                                                                                                                                                                                                                                                      |
| Article Type:                 | Protocol                                                                                                                                                                                                                                                                                                                                                                                                                                                                                                                                                                                                                                                                                                                                                                                                                                                                                                                                                                                                                                                                                                                                                                                                                                                                                                                                                                                                                                                                                                                                                                                                                                 |
| Date Submitted by the Author: | 15-Jun-2021                                                                                                                                                                                                                                                                                                                                                                                                                                                                                                                                                                                                                                                                                                                                                                                                                                                                                                                                                                                                                                                                                                                                                                                                                                                                                                                                                                                                                                                                                                                                                                                                                              |
| Complete List of Authors:     | <p>Dunn, Sarah; Newcastle University, Newcastle Clinical Trials Unit<br/> Brocklebank, Victoria; Newcastle University, National Renal Complement Therapeutics Centre<br/> Bryant, Andrew; Newcastle University, Population Health Sciences Institute<br/> Carnell, Sonya; Newcastle University, Newcastle Clinical Trials Unit<br/> Chadwick, Thomas; Newcastle University, Population Health Sciences Institute<br/> Johnson, Sally; Newcastle Upon Tyne Hospitals NHS Foundation Trust, Great North Children's Hospital ; Newcastle University, National Renal Complement Therapeutics Centre<br/> Kavanagh, David; Newcastle University, Translational and Clinical Research Institute ; Newcastle University, National Renal Complement Therapeutics Centre<br/> Lecouturier, Jan; Newcastle University, Population Health Sciences Institute<br/> Malina, Michal; Newcastle Upon Tyne Hospitals NHS Foundation Trust, Great North Children's Hospital; Newcastle University, National Renal Complement Therapeutics Centre<br/> Moloney, Eoin; Optimax Access LTD, Health Economics<br/> Oluboyede , Yemi; Newcastle University, Population Health Sciences Institute<br/> Weetman, Christopher; Newcastle University, Newcastle Clinical Trials Unit<br/> Wong, Edwin; Newcastle University, Translational and Clinical Research Institute ; Newcastle University, National Renal Complement Therapeutics Centre<br/> Woodward, Len; aHUS alliance Global Action<br/> Sheerin, Neil; Newcastle University, Translational and Clinical Research Institute ; Newcastle University, National Renal Complement Therapeutics Centre</p> |
| Keywords:                     | NEPHROLOGY, HEALTH ECONOMICS, QUALITATIVE RESEARCH                                                                                                                                                                                                                                                                                                                                                                                                                                                                                                                                                                                                                                                                                                                                                                                                                                                                                                                                                                                                                                                                                                                                                                                                                                                                                                                                                                                                                                                                                                                                                                                       |
|                               |                                                                                                                                                                                                                                                                                                                                                                                                                                                                                                                                                                                                                                                                                                                                                                                                                                                                                                                                                                                                                                                                                                                                                                                                                                                                                                                                                                                                                                                                                                                                                                                                                                          |

1  
2  
3  
4  
5  
6  
7  
8  
9  
10  
11  
12  
13  
14  
15  
16  
17  
18  
19  
20  
21  
22  
23  
24  
25  
26  
27  
28  
29  
30  
31  
32  
33  
34  
35  
36  
37  
38  
39  
40  
41  
42  
43  
44  
45  
46  
47  
48  
49  
50  
51  
52  
53  
54  
55  
56  
57  
58  
59  
60

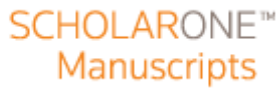

# Protocol for a multicentre, open label, prospective, single arm study of the safety and impact of eculizumab withdrawal in patients with atypical haemolytic uraemic syndrome

Version 1.0, 14.06.2021

## Details of corresponding author

| Full name          | Postal address                                                                                                        | Email                                                                        | ORCID ID            |
|--------------------|-----------------------------------------------------------------------------------------------------------------------|------------------------------------------------------------------------------|---------------------|
| Ms Sarah Dunn, MSc | Newcastle Clinical Trials Unit,<br>Newcastle University, 1-4 Claremont Terrace, Newcastle Upon Tyne, England, NE2 4AE | <a href="mailto:Sarah.dunn2@newcastle.ac.uk">Sarah.dunn2@newcastle.ac.uk</a> | 0000-0002-1901-3931 |

## Details of Co-authors

| Full name                                          | Department                                                                                                                       | Institution                                                                 | City                | Country | Email                                                                                          |
|----------------------------------------------------|----------------------------------------------------------------------------------------------------------------------------------|-----------------------------------------------------------------------------|---------------------|---------|------------------------------------------------------------------------------------------------|
| Dr Victoria Brocklebank, MBBS                      | National Renal Complement Therapeutics Centre                                                                                    | Newcastle University                                                        | Newcastle Upon Tyne | England | <a href="mailto:Victoria.Brocklebank@newcastle.ac.uk">Victoria.Brocklebank@newcastle.ac.uk</a> |
| Mr Andrew Bryant, MSc                              | Population Health Sciences                                                                                                       | Newcastle University                                                        | Newcastle Upon Tyne | England | <a href="mailto:andy.bryant@newcastle.ac.uk">andy.bryant@newcastle.ac.uk</a>                   |
| Dr Sonya Carnell PhD                               | Newcastle Clinical Trials Unit                                                                                                   | Newcastle University                                                        | Newcastle Upon Tyne | England | <a href="mailto:sonya.carnell@newcastle.ac.uk">sonya.carnell@newcastle.ac.uk</a>               |
| Dr Thomas J Chadwick PhD                           | Population Health Sciences                                                                                                       | Newcastle University                                                        | Newcastle Upon Tyne | England | <a href="mailto:thomas.chadwick@newcastle.ac.uk">thomas.chadwick@newcastle.ac.uk</a>           |
| Dr Sally Johnson MB ChB MRCPC, PhD                 | Great North Children's Hospital, Translational and Clinical Research Institute and National Renal Complement Therapeutics Centre | Newcastle Upon Tyne Hospitals NHS Foundation Trust and Newcastle University | Newcastle Upon Tyne | England | <a href="mailto:sally.johnson15@nhs.net">sally.johnson15@nhs.net</a>                           |
| Professor David Kavanagh, MB, ChB, MRCP, PhD, FRCP | Translational and Clinical Research Institute and National Renal Complement Therapeutics Centre                                  | Newcastle University                                                        | Newcastle Upon Tyne | England | <a href="mailto:David.Kavanagh@newcastle.ac.uk">David.Kavanagh@newcastle.ac.uk</a>             |

|                                          |                                                                                                 |                                                                             |                     |         |                                                                                              |
|------------------------------------------|-------------------------------------------------------------------------------------------------|-----------------------------------------------------------------------------|---------------------|---------|----------------------------------------------------------------------------------------------|
| Ms Jan Lecouturier, MSc                  | Population Health Sciences                                                                      | Newcastle University                                                        | Newcastle Upon Tyne | England | <a href="mailto:jan.lecouturier@newcastle.ac.uk">jan.lecouturier@newcastle.ac.uk</a>         |
| Dr Michal Malina, MD, PhD, FRCPCH        | Great North Children's Hospital and National Renal Complement Therapeutics Centre               | Newcastle Upon Tyne Hospitals NHS Foundation Trust And Newcastle University | Newcastle Upon Tyne | England | <a href="mailto:michal.malina@nhs.net">michal.malina@nhs.net</a>                             |
| Mr Eoin Moloney, MSc                     | Health Economics                                                                                | Optimax Access LTD                                                          | Newcastle Upon Tyne | England | <a href="mailto:eoin.moloney@optimaxaccess.com">eoin.moloney@optimaxaccess.com</a>           |
| Dr Yemi Oluboyede PhD                    | Population Health Sciences                                                                      | Newcastle University                                                        | Newcastle Upon Tyne | England | <a href="mailto:yemi.oluboyede@newcastle.ac.uk">yemi.oluboyede@newcastle.ac.uk</a>           |
| Mr Christopher Weetman, BSc              | Newcastle Clinical Trials Unit                                                                  | Newcastle University                                                        | Newcastle Upon Tyne | England | <a href="mailto:christopher.weetman@newcastle.ac.uk">christopher.weetman@newcastle.ac.uk</a> |
| Dr Edwin Kwan Soon Wong, MBChB, PhD MRCP | Translational and Clinical Research Institute and National Renal Complement Therapeutics Centre | Newcastle University                                                        | Newcastle Upon Tyne | England | <a href="mailto:edwin.wong@newcastle.ac.uk">edwin.wong@newcastle.ac.uk</a>                   |
| Mr Len Woodward                          | N/A                                                                                             | aHUS alliance Global Action                                                 | Newcastle Upon Tyne | England | <a href="mailto:len.woodward@ntlworld.com">len.woodward@ntlworld.com</a>                     |
| Professor Neil Sheerin, MBBS, PhD, MRCP  | Translational and Clinical Research Institute and National Renal Complement Therapeutics Centre | Newcastle University                                                        | Newcastle Upon Tyne | England | <a href="mailto:Neil.Sheerin@newcastle.ac.uk">Neil.Sheerin@newcastle.ac.uk</a>               |

**Word Count: 4504**

## ABSTRACT

### Introduction

Atypical haemolytic uraemic syndrome (aHUS) is a rare, life threatening disease caused by excessive activation of part of the immune system called complement. Eculizumab is an effective treatment, controlling aHUS in 90% of patients. Due to the risk of relapse, lifelong treatment is currently recommended. Eculizumab treatment is not without problems, foremost being the risk of severe meningococcal infection, the burden of bi-weekly intravenous injections and the high cost.

This paper describes the design of the Stopping Eculizumab Treatment Safely in aHUS (SETS aHUS) trial that aims to establish whether a safety monitoring protocol, including the reintroduction of Eculizumab for those who relapse, could be a safe, alternative treatment strategy for patients with aHUS.

### Methods and analysis

This is a multi-centre, non-randomised, open label study of Eculizumab withdrawal with continuous monitoring of serious adverse events using the Bayes factor single arm design. 30 patients will be recruited to withdraw from Eculizumab and have regular blood and urine tests for 24 months, to monitor for disease activity. If relapse occurs, treatment will be restarted within 24 hours of presentation. 20 patients will remain on treatment and complete health economic questionnaires only. An embedded qualitative study will explore the views of participants.

### Ethics and dissemination

A favourable ethical opinion was obtained from the North East - Tyne & Wear South Research Ethics Committee. Outcomes will be disseminated via peer-reviewed articles and conference presentations.

### Trial registration

EudraCT Number: 2017-003916-37

ISRCTN number: ISRCTN17503205

Date of Registration: 20 April 2018

### Keywords

atypical Haemolytic Uraemic Syndrome, qualitative research, Complement, Eculizumab

### Article summary

Strengths and limitations of this study

- This is the first UK trial to evaluate the safety of eculizumab withdrawal in patient with aHUS.
- This trial fulfils the NICE recommendation that a research programme, with robust methods, should be carried out to evaluate when stopping Eculizumab treatment or dose adjustment might occur.
- Clinical experience suggests if relapse occurs this will likely happen in the first 12 months of withdrawal however, this trial follows patients up for 24 months to capture those patients who may relapse after the 12-month point.
- The small number of aHUS patients on treatment in the UK is insufficient to conduct a standard parallel group, randomised controlled trial.
- COVID-19 has had an impact on recruitment.

### Trial Status

This manuscript is based upon trial protocol version 7.0 dated 14<sup>th</sup> January 2021. Planned recruitment end date is 31<sup>st</sup> August 2021 and planned last patient visit is August 2023.

## INTRODUCTION

Atypical Haemolytic Uraemic Syndrome (aHUS) is a severe, life-threatening disease characterised by thrombocytopenia, microangiopathic haemolytic anaemia and Acute Kidney Injury (AKI), and other organ involvement. Historically it is associated with a poor prognosis, with 50% of patients developing end stage kidney disease or dying in the first year after presentation [1] and a high risk of disease recurrence after kidney transplantation [2]. Prior to 2011, treatment options were limited and relied on plasma infusion or exchange, but in many cases this treatment failed to influence the course of disease [1] and was itself associated with significant morbidity and mortality [3]. In the UK, the incidence of aHUS is 0.4-0.5 cases per million per year [4].

The complement system is part of the innate immune system and in health is tightly regulated to prevent excessive activation. In 60-70% of patients with aHUS, a genetic variant or autoantibody increasing complement activation can be identified (10). In these patients, excessive activation of complement leads to endothelial injury and thrombus formation. The underlying genetic variant that predisposes to disease has an influence on the severity of disease and the likelihood of recurrent disease developing after transplantation [5].

Eculizumab is a humanized monoclonal antibody that inhibits the function of C5, an important protein involved in complement activation. Two uncontrolled, open label trials involving 36 adult and adolescent patients demonstrated the efficacy of Eculizumab treatment for aHUS over a 26 week period [6]. Additional prospective studies in children [7] and adults [8] confirmed efficacy. Follow-up of the original cohort suggests that treatment for 2 years is associated with good, longer-term clinical outcomes [9]. On the basis of the initial trial results, Eculizumab was approved for the treatment of aHUS by the European Medicines Agency (EMA) [10] and U.S. Food & Drug Administration (FDA) [11] in 2011. The National Institute for Health and Care Excellence (NICE) published its evaluation in 2015, recommending that Eculizumab should be used for the treatment of aHUS [12]. A recommendation in the NICE evaluation was that funding was on the condition that there was a 'research programme with robust methods to evaluate when stopping treatment or dose adjustment might occur'.

Complement is part of the immune system, therefore, treatment with Eculizumab is immunosuppressive, in particular, increasing the risk of *Neisseria meningitidis* infection (1-2000 fold)[13, 14]. All patients are vaccinated against meningococcal infection before starting Eculizumab and in the UK continuous prophylactic antibiotics are recommended. Despite these recommendations, there have been 6 cases of meningococcal infection in the UK in patients on Eculizumab treatment for aHUS. We are also aware of uncommon infections occurring in this group (enteroviral pneumonitis and *Herpes simplex* meningitis) but whether these are attributable to Eculizumab treatment is unclear.

Although there have been reports of patients relapsing after the withdrawal of treatment [15], there is increasing evidence that continuous treatment is not required for all patients. From experience prior to the introduction of Eculizumab, the risk of relapse is greatest in the period immediately after first presentation. In the first year after presentation, 25% of children and 29% of adults will experience a relapse. 82% of relapses in adults, and 57% of relapses in children, occur in the first year after disease onset. Beyond the first year, only a further 20% of patients will relapse in the subsequent 5-10 years [1]. Therefore, a proportion of patients will not relapse after their initial presentation and will be on Eculizumab unnecessarily. In addition, with monitoring for relapse and early reintroduction of treatment, complications from relapse can be avoided [16-18].

In this trial we will test the safety of eculizumab withdrawal using a Bayesian trial design. The efficacy of self-monitoring will also be tested, and we will explore patients' and parents/legal guardians' views on how treatment and monitoring of disease can be delivered most effectively.

## METHODS AND ANALYSIS

### Objectives and outcome measures

#### Primary

The primary clinical objective is to determine the safety of Eculizumab withdrawal in patients with aHUS, measured by the number of patients with a Thrombotic microangiopathy (TMA) related Serious Adverse Event (SAE) defined as any of the following:

- Irreversible (>3 months) reduction in estimated glomerular filtration rate (eGFR) by-not attributable to another cause:

#### *In adults*

- by  $\geq 20\%$  if the screening eGFR is  $< 90\text{mls/min/1.73m}^2$ ,
- by  $> 20\%$  to a level  $< 90\text{mls/min/1.73m}^2$  if the screening eGFR is  $> 90\text{mls/min/1.73m}^2$ .

#### *In children*

- by  $\geq 20\%$  if the screening eGFR is  $< 75\text{mls/min/1.73m}^2$ ,
- by  $> 20\%$  to a level  $< 75\text{mls/min/1.73m}^2$  if the screening eGFR is  $> 75\text{mls/min/1.73m}^2$ .

#### Secondary

##### *Clinical*

1. Measure the effectiveness of a monitoring protocol to detect disease relapse following withdrawal of Eculizumab.
2. Describe the relapse rate after withdrawal of Eculizumab.
3. Estimate the proportion of patients, currently on long-term treatment with Eculizumab, who can be maintained off treatment.
4. Describe the period from withdrawal to relapse in those patients who restart treatment.
5. Measure the change in estimated Glomerular Filtration rate (eGFR) over the course of the study.
6. Identify important clinical and laboratory indicators of imminent relapse.

##### *Health Economic*

7. To assess the within-trial costs and health outcomes (measured in terms of resource use of primary and secondary health care NHS services and quality-adjusted life years (QALYs)) for patients on standard care (not withdrawing from Eculizumab treatment) over the two-year trial duration.
8. To assess the within-trial costs and health outcomes for patients fully, or partially, withdrawing from Eculizumab treatment, and on a policy of protocolised monitoring, over the two-year trial duration.
9. To model the lifetime costs and outcomes associated with Eculizumab withdrawal, and a policy of protocolised monitoring following withdrawal (and treatment re-introduction if necessary), compared with standard care, beyond the two-year timeframe of the trial.

### Trial Design

This is a multi-centre, non-randomised, open label study of Eculizumab withdrawal with continuous monitoring of serious adverse events using the Bayes factor single arm design of Johnson and Cook [19]. The patients will self-select whether they wish to withdraw from Eculizumab and carry out the monitoring protocol or remain on treatment and be part of the Health Economic analysis-only. An economic analysis, informed by the results of this trial, will determine whether Eculizumab withdrawal, substituting treatment with a protocolised surveillance and treatment reintroduction strategy, is cost-effective. The patient visit schedule for the withdrawal cohort is shown in Figure 1, and the Health Economic cohort in Figure 2.



## Trial setting

This multi-centre trial will be carried out in up to 20 adult and paediatric Renal units (secondary and tertiary care) in the UK who are using Eculizumab to treat patients with aHUS.

## Eligibility

All patients must fulfil the following inclusion criteria in order to be eligible for the trial:

- Age  $\geq 2+$  years of age,
- On Eculizumab treatment for at least 6 months,
- In remission with no evidence of ongoing microangiopathic haemolytic anaemia (MAHA) activity at screening defined by:
  - Platelet count  $>$  lower limit of normal as determined by local reference range,
  - Lactate Dehydrogenase (LDH)  $< 2$  upper limit of normal as determined by local lab reference ranges,
- Normal renal function or Chronic Kidney Disease (CKD) stages 1-3,
- Absence of decline of renal function confirmed by review of available assessments of renal function for the preceding 6 months by the Chief Investigator (CI) and clinical members of the Trial Management Group (TMG).

The following inclusion criteria must be met only by those wishing to participate in the withdrawal component of the trial:

- Willing to attend for safety monitoring assessments,
- Willing to travel only to countries that can supply Eculizumab (to be confirmed with co-ordinating centre prior to travel),
- Able to perform or parent/guardian to perform and record self-monitoring urinalysis,
- Sexually active female patients must have a negative pregnancy test at screening and be using an effective contraception for the duration of the study.

OR

- fulfil one of the following criteria:
  - Be post-menopausal,
  - Have undergone surgical sterilisation.

The following exclusion criteria is applicable to all patients wishing to participate in the trial:

- Severe non-renal disease manifestations at initial presentation with aHUS, which in the opinion of the Chief Investigator and/or the clinical members of the TMG makes the risk of treatment withdrawal unacceptable,
- Current or planned pregnancy within the study duration,
- Unable to give informed consent or assent, or unable to obtain parent/guardian consent if under 16 years of age,
- Current participation in another clinical trial (not including participation in aHUS registries),
- Severe, uncontrolled hypertension (systolic blood pressure  $> 160$  mmHg) that is likely to induce a TMA.

The following exclusion criteria is applicable only to those wishing to participate in the withdrawal component of the trial:

- Loss of a previous transplant kidney to recurrent aHUS,
- Transplant recipient with a pathogenic mutation in *C3*, *CFH* or *CFB*,
- Haematuria rating of 3+.

## Screening and Recruitment

30 patients will be recruited to withdraw from Eculizumab treatment, and 20 patients will be recruited who will remain on treatment and complete the Health Economic questionnaires only.

Patients with a diagnosis of aHUS receiving Eculizumab to treat disease in native or transplanted kidneys will be identified by the National aHUS Service, which maintains a list of patients who fulfil these criteria as part of the NHS

England commissioned service. Those patients who meet the genetic eligibility criteria will be highlighted to site teams who will carry out formal screening assessments. A physical examination and vital signs will be performed, and routine safety laboratory tests will be reviewed to ensure that a patient fulfils all eligibility criteria for entry into the study. Female participants withdrawing from treatment, who are of childbearing age and sexually active, will be required to have a negative pregnancy test prior to treatment withdrawal. Participants will also consent to have samples taken for exploratory analysis and storage at Newcastle University biobank for use in future research.

Consent will be sought from the parents/legal guardian on behalf of patients under the age of 16. Assent will be taken from those patients under 16 years old, as appropriate. No trial related procedures will be carried out prior to consent.

### **Intervention**

Patients who consent to withdraw from Eculizumab will receive their last dose of Eculizumab at this visit (day -14).

### **Visit Details and Assessments**

Baseline Assessments & Data collection for withdrawal cohort (Visit 2, Day 0 +/- 2 days)

Study day 0 will be the day that the participants would usually receive their next dose of Eculizumab, based on standard dosing schedules (+/-2 days). The Eculizumab will not be administered however, meningococcal prophylaxis will be continued for a further 2 weeks after day 0.

At day 0 of the study (Visit 2), participants will undergo the following assessments:

Vital signs (temperature, pulse and blood pressure), Height & weight, renal function (creatinine and eGFR), Urinalysis and urine protein/creatinine ratio, haemolysis markers including platelet count, haemoglobin, LDH, Electrolyte Profile, Liver Function (Bilirubin, ALT/AST, ALP, LDH, serum calcium, phosphate, albumin & total protein), haptoglobin (if available) and blood film, concomitant medication review, health-related quality of life questionnaires (EQ-5D-5L and SF-36) and health care utilisation questionnaire. The biomarkers and complement activation sample is also taken and stored at site before transfer to Newcastle University.

Study Visit Assessments & Data collection for withdrawal cohort (Visits 3-34)

Participants will be assessed regularly for evidence of disease relapse for the 2-year duration of the study. The participants will attend a total of 32 safety monitoring visits over the 2-year withdrawal follow-up period.

Trial participants will be reviewed at the trial site weekly (+/- 2 days) for the first month, then alternate weeks (+/-2 days) until month 6, then monthly (+/- 7 days) thereafter until the end of the trial period (month 24). At each study visit, the participants will undergo the monitoring assessments as detailed in Figure 1.

Paediatric participants must have their weight recorded at every visit for calculation of eGFR. At the end of the trial, the level of safety monitoring for those patients who remain off treatment and disease free will be decided by their local clinical care team in discussion with the National aHUS Service.

Due to the COVID-19 pandemic, participants may be unable to attend their scheduled follow up visits or may be attending a local hospital to have safety bloods taken. If the participants are unable to attend site due to self-isolation or underlying health issues; where possible, a remote, follow-up call will be carried out by a member of the local research team. Participants will be asked to report changes to their concomitant medications, any adverse events experienced since their previous follow-up and the results of their home urinalysis tests.

### **Health Economic Assessments**

Participants, or their parent/legal guardian, in both withdrawal and Health Economics cohorts will complete the EQ-5D-5L (proxy version if patient < 12 years), SF36 (parent/legal guardian completes if patient <14 years) and a health care utilisation questionnaire at 8 timepoints. A time and travel questionnaire is completed at 1 timepoint, as detailed in Figures 1 and 2.





## Self-monitored Urinalysis

Withdrawal participants, or their parent/legal guardian, will be trained to perform and understand the results of home urinalysis. Urinalysis will then be performed daily by the participant or parent/legal guardian for the first month and then three times per week for the remainder of the study period. The results will be recorded in a participant diary and will be reviewed at each study visit. Participants or their parent/legal guardian will report any significant change in urinalysis, not related to menstruation, using their own baseline result to guide them in relation to the thresholds as detailed in *Table 1*.

*Table 1. Home Urinalysis result thresholds*

| Baseline  | urinalysis result threshold (not related to menstruation)     |
|-----------|---------------------------------------------------------------|
| Neg/Trace | ++ on any occasion OR + on any two occasions 24 hours apart   |
| +         | +++ on any occasion OR ++ on any two occasions 24 hours apart |
| ++        | +++ on any occasion                                           |

If the threshold criteria are met, participants or their parent/legal guardian will contact their treatment site immediately to arrange an unscheduled visit to assess disease activity as outlined in *Figure 1*.

## Trial Withdrawal

Participants will have the right to withdraw from the study at any time for any reason, and without giving a reason. The investigator will also have the right to withdraw participants from the study if she/he judges this to be in their best interest. Those participants who have been withdrawn from treatment can request to restart treatment, even if they have not relapsed. Data and blood samples provided by the participant up until the point of withdrawal will be included in analysis, unless they specifically request to have this removed. Participants who withdraw from the trial will not be replaced.

## Change in Health Status

Participants will be advised to report any significant change in health status to the responsible site or local health care provider. Participants will be provided with a participant identification card to present to attending medical staff with details of the study, tests required and study centre and National aHUS Service contact details. Sites will notify the participants' General Practitioner of their involvement in the study and inform them of the required action to be taken in the case of suspected relapse. Criteria for a diagnosis of aHUS relapse are shown in *Figure 3*.

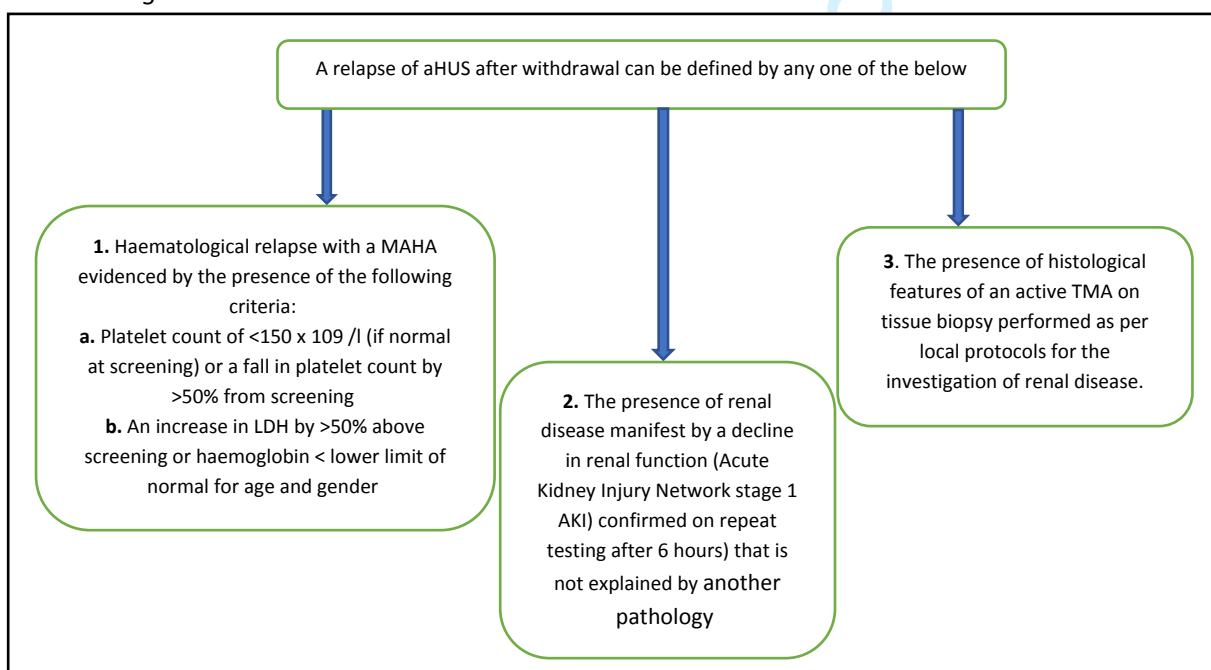

*Figure 3. Criteria for diagnosis of aHUS relapse*

If there is a clinical suspicion of disease activity, formal assessment will occur as outlined in *Figure 1*, Unscheduled visit column.

Any other adverse events that could represent a relapse will be discussed with the Investigators and/or the aHUS National Service. A decision to restart will be made according to current Service procedures.

## Relapse Management

When a relapse is diagnosed, participants will restart Eculizumab treatment within 24 hours of presentation provided there is no evidence of an active infection that would be a contra-indication to treatment at the recommended dose of 900mg weekly for the first 4 weeks then 1200mg every two weeks thereafter (or age adjusted dose and regime). TMA activity will be monitored (platelet count, LDH) as recommended by attending clinician until haematological remission is achieved as defined in *Figure 4*.

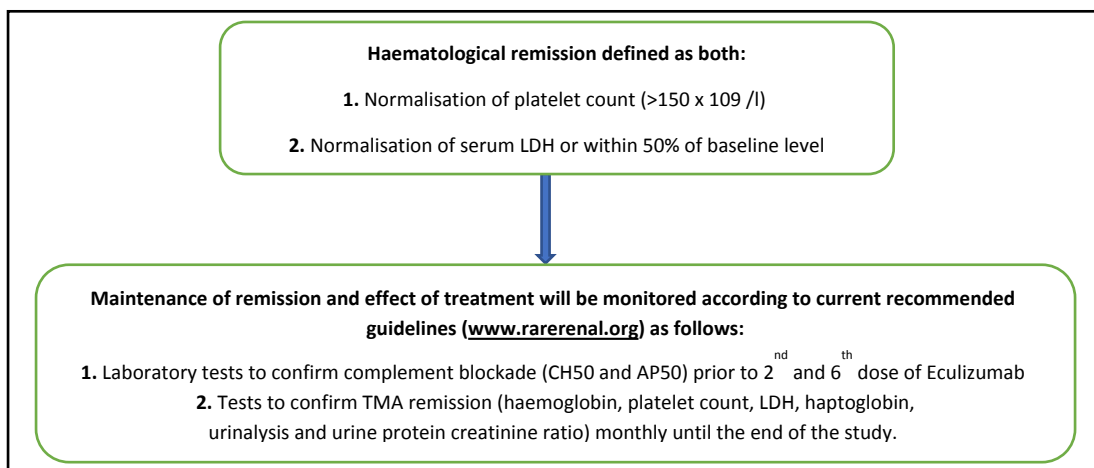

*Figure 4. Haematological remission*

Participants who relapse and require re-introduction of Eculizumab treatment will remain on treatment in study under follow up for the full 2 years of the study. Home urinalysis will not be required after re-introduction of Eculizumab treatment.

Participants will consent to travel to only those countries where Eculizumab is available. If a participant relapses while they are travelling outside of the country, the National aHUS Service will make arrangements with the destination country to access and fund Eculizumab if required, with arrangements from the commissioning authority.

## Embedded qualitative study

In-depth one-to-one telephone interviews will be conducted following a topic guide developed with the input of the research team, including PPI. The intention is to keep interviews very broad to ensure we capture the full experience of interviewees.

Up to 30 patients who withdraw from Eculizumab and up to 20 patients who decline to withdraw will be approached to participate. Up to 20 patients who withdraw will be re-interviewed at the end of the withdrawal period (24 months later) to explore their views of the monitoring protocol. This group will be asked at the first interview if they agree to be contacted again towards the end of the study for a follow up interview. Where possible, any patients who relapse and go back onto treatment will also be interviewed. Consent will be recorded at the time of the interview. Interviews will be digitally recorded with the permission of the interviewee, transcribed verbatim and anonymised.

## Safety reporting

All Adverse Events (AEs) occurring from the point of withdrawal (day 0) to end of study participation will be recorded. SAEs occurring from the point of withdrawal (day 0) must be reported to The Newcastle Clinical Trials Unit (NCTU) within 24 hours of the site becoming aware of the event. Serious Adverse Reactions (SARs) and Suspected Unexpected Serious Adverse Reactions (SUSARs) are reportable only for those participants who have Eculizumab treatment re-initiated during their participation in the trial. The assessment of expectedness will be performed by the PI at site against the approved Reference Safety Information (RSI) for the trial (Section 4.8 of the Soliris SmPC).

## Statistical Analysis

### Sample size

A maximum of 30 patients will be recruited to the withdrawal component; this is judged to be reasonable given the rare nature of the disease. The specifics of this sample size are intrinsically linked to the Bayes factor single arm binary design employed to analyse the primary outcome measure. There is no allowance for loss to follow-up as this patient group is already subject to a high degree of clinical follow-up and death is defined as one of the serious events under consideration. 20 patients will be recruited to the non-withdrawal arm as a comparator group for health economic analysis only.

### Analysis

This is a single arm, open label trial with the primary endpoint being a binary response (the presence/absence of a primary outcome event within the follow-up period). We will compare the rate of serious events following the withdrawal of medication to that expected under standard care.

The Bayes factor single arm binary model [19] will be used to monitor the trial. Based on historical data, the event rate for the standard of care is 0.06, and we expect that withdrawal of the treatment would give a rate of 0.12. This choice of rate has been informed in discussion with patients. Using this Bayesian hypothesis test-based design, we assume the rate is 0.06 under the null, and 0.12 under the alternative hypothesis.

We assume that the sample distribution of number of responses follows a binomial distribution and use an inverse moment prior for response under the alternative hypothesis.

### Stopping Rules

A minimum of 5 patients will be enrolled before applying the stopping rules, and the cohort size for monitoring is 5 patients. The Data Monitoring Committee (DMC) can request earlier review if adverse events are reported before this point.

We implement two stopping rules:

(1) We will stop the trial for superiority (there being fewer serious events on the intervention than would be expected under standard of care) if the posterior probability of the alternative hypothesis is less than 0.05, i.e.  $\Pr(H1 | \text{Data}) < 0.05$ ;

(2) We will stop the trial for inferiority if the posterior probability of the alternative hypothesis is greater than 0.80, i.e.,  $\Pr(H1 | \text{Data}) > 0.80$ .

### Operating Characteristics and Stopping Boundaries

The operating characteristics (Table 2) and stopping boundaries (Table 3) were produced using the M. D. Anderson Cancer Center Department of Biostatistics software BayesFactorBinary, version 1.0

[https://biostatistics.mdanderson.org/SoftwareDownload/SoftwareFiles/BayesFactorBinary/UsersGuide\\_BayesFactorBinary.pdf](https://biostatistics.mdanderson.org/SoftwareDownload/SoftwareFiles/BayesFactorBinary/UsersGuide_BayesFactorBinary.pdf)



Table 2. Operating Characteristics

| Scenario | True rate of serious events | Probability of Stopping for Inferiority | Probability of Stopping for Superiority | Average number of patients treated (Percentiles: 10%, 25%, 50%, 75%, 90%) |
|----------|-----------------------------|-----------------------------------------|-----------------------------------------|---------------------------------------------------------------------------|
| 1        | 0.06                        | 0.096                                   | 0                                       | 28.44 (30, 30, 30, 30, 30)                                                |
| 2        | 0.12                        | 0.443                                   | 0                                       | 23.48 (5, 15, 30, 30, 30)                                                 |
| 3        | 0.18                        | 0.753                                   | 0                                       | 17.76 (5, 10, 15, 30, 30)                                                 |
| 4        | 0.24                        | 0.928                                   | 0                                       | 13.72 (5, 5, 15, 15, 30)                                                  |
| 5        | 0.30                        | 0.982                                   | 0                                       | 10.52 (5, 5, 10, 15, 20)                                                  |

If the true rate is 0.06 (Scenario 1, null hypothesis), the trial will stop with probabilities of 0.096 and 0 in favour of the alternative and null hypotheses, respectively. The average number of patients (10%, 90% percentiles) is 28.44 (30, 30). If the true rate is 0.12 (Scenario 2, alternative hypothesis), the trial will stop with probabilities of 0.443 and 0 in favour of the alternative and null hypotheses, respectively. The average number of patients (10%, 90%) is 23.48 (5, 30).

Table 3 – SETS aHUS Trial Stopping Boundaries

| Number of patients (in complete cohorts of 5) | Stop the trial for Superiority if there are this many Events (inclusive) | Continue the trial if there are this many Events (inclusive)      | Stop the trial for Inferiority if there are this many Events (inclusive) |
|-----------------------------------------------|--------------------------------------------------------------------------|-------------------------------------------------------------------|--------------------------------------------------------------------------|
| 5                                             | Never stop for superiority with this many patients                       | 0-1                                                               | 2-5                                                                      |
| 10 or 15                                      | Never stop for superiority with this many patients                       | 0-2                                                               | 3-15                                                                     |
| 20                                            | Never stop for superiority with this many patients                       | 0-3                                                               | 4-20                                                                     |
| 25 or 30                                      | Never stop for superiority with this many patients                       | 0-4 (The trial always stops at 30 patients, which is the maximum) | 5-30                                                                     |

The study will stop for inferiority with 2 serious events in the first cohort of 5 participants. Subsequently, the study would stop if 3 or more serious events are observed in the first 15 participants, 4 or more in the first 20 participants, and 5 or more in the whole study population. We are well placed to respond to any negative safety signal.

1000 repetitions were used in the software simulation. Calculations with different numbers of repetitions resulted in unchanged stopping boundaries with only marginal changes to the operating characteristics.

There may be differing risk of relapse according to disease aetiology. However, the available numbers do not allow for risk strata to be monitored separately. The DMC will consider this within their remit.

In addition to this ongoing analysis, at the end of the study, data will also be reported descriptively, together with the number of patients recruited. Descriptive statistics reported will be selected as appropriate to the specific outcome measure. For proportion outcomes, the number of patients recording the event will also be reported.

Due to the sample size, no comparative statistical methods will be applied. There will be no imputation of missing data and a complete case analysis will be undertaken.

### Subgroup Analyses

Except for the analysis of the primary outcome on an ongoing basis, the analyses described above may be reported separately for different genetic groups or risk strata.



## Health Economic analysis

### Within-trial assessments of costs and outcomes

Costs and health outcomes (measured in terms of resource use of primary and secondary health care NHS services and QALYs) associated with Eculizumab withdrawal (30 participants), compared with standard care (20 participants), will be assessed over the 24-month follow-up period. Information on costs and health outcomes will be recorded for each individual involved in both treatment groups. Data derived from the within-trial analysis will be assessed to understand the key determinants of differences in costs and outcomes between the two patient groups. Data will then be used to parameterise the lifetime economic model (combined with data from the literature).

### Assessment of cost-effectiveness

An economic decision model will be developed to assess the cost-effectiveness of the alternative treatment options under evaluation. Costs and health consequences, measured in terms of QALYs, associated with Eculizumab withdrawal, and a policy of monitoring following withdrawal, and standard care, beyond the two-year timeframe of the trial will be captured. We propose to conduct a cost-utility analysis, with results presented in terms of incremental cost per QALY gained.

## Qualitative analysis

We will take an inductive approach to data collection and analysis. This means there is no a priori theory; themes, concepts and theories will be elicited from the interview data when it is analysed and drawing upon relevant literature, PPI, and experts in the study team. Data will be analysed thematically using a constant comparative method. This entails a process of familiarisation with the data and then the development of a thematic framework. A small number of transcripts will be coded, and the framework amended accordingly. A second level analysis will be conducted using a constant comparative method. This involves a process of comparing and contrasting themes elicited from the data, within and across interviews [21]. NVivo will be used as a data management tool.

## Trial Management and monitoring

This trial is sponsored by the Newcastle Upon Tyne Hospitals NHS Foundation Trust. The trial will be co-ordinated by a TMG that will include those individuals responsible for the day-to-day management of the trial. A Trial Steering Committee (TSC) made up of independent clinical and lay members will provide overall supervision of the trial. A Data Monitoring Committee (DMC) composed of independent clinicians and statistician will undertake independent review and monitor efficacy and safety endpoints. The Newcastle Clinical Trials Unit (NCTU) will be responsible for communicating protocol amendments to participating sites and carrying out central, remote, and on-site monitoring.

## Confidentiality and data handling

Personal data will be regarded as strictly confidential. To preserve anonymity, a unique participant ID will be assigned to each participant at consent. Only the clinical team at the participating sites will have access to key data which links study identifiers to individual datasets. All study records and Investigator Site Files will be kept at site in a locked filing cabinet with restricted access.

Written consent will be sought from participants or legal guardians, if patient is under the age of 16 years, to allow access to their hospital records.

Data is recorded by authorised staff and stored in a secure web-based electronic data capture system (MACRO) designed and maintained by NCTU hosted on secure servers at Rackspace within the UK. Analysis of the data will be undertaken by the Newcastle University trial statisticians. Anonymised data from this trial may be available to the scientific community subject to regulatory and ethics approval. Requests for data should be directed to the corresponding author. All study data will be archived for 5 years.

## Patient and public involvement (PPI)

A PPI representative sits on the Trial Management Group, was involved in protocol and study document development, and is involved in ongoing trial management discussions. We also have an aHUS patient as an independent member of the Trial Steering Committee.

## ETHICS AND DISSEMINATION

A favourable ethical opinion was obtained from the North East - Tyne & Wear South Research Ethics Committee in April 2018. Written informed consent will be obtained from all participants prior to their involvement in the trial. The results of the study will be submitted to peer-reviewed journals, presented at conferences and on the trial website.

## DISCUSSION

This study will determine whether it is safe to withdraw Eculizumab using a trial methodology designed to detect an excess of adverse outcomes following withdrawal (primary endpoint). The study will also estimate the proportion of patients with aHUS that can be maintained off Eculizumab and test a system for surveillance to identify relapse early (secondary endpoints). This will allow a cost-utility analysis to be conducted, exploring the impact of treatment withdrawal [20]. This carefully monitored patient group will allow us to determine how early sub-clinical relapse can be detected using standard biochemical and haematological measurements and novel biomarkers of complement activation or tissue injury. An embedded qualitative study of patients, both those who withdraw and decide not to withdraw, will explore attitudes towards treatment and its withdrawal.

## REFERENCES

1. Fremeaux-Bacchi V, Fakhouri F, Garnier A, Bienaime F, Dragon-Durey MA, Ngo S, Moulin B, Servais A, Provot F, Rostaing L *et al*: Genetics and outcome of atypical hemolytic uremic syndrome: a nationwide French series comparing children and adults. *Clin J Am Soc Nephrol* 2013, 8(4):554-562.
2. Noris M, Remuzzi G: Thrombotic microangiopathy after kidney transplantation. *Am J Transplant* 2010, 10(7):1517-1523.
3. Johnson S, Stojanovic J, Ariceta G, Bitzan M, Besbas N, Frieling M, Karpman D, Landau D, Langman C, Licht C *et al*: An audit analysis of a guideline for the investigation and initial therapy of diarrhea negative (atypical) hemolytic uremic syndrome. *Pediatric nephrology (Berlin, Germany)* 2014, 29(10):1967-1978.
4. Sheerin NS, Kavanagh D, Goodship TH, Johnson S: A national specialized service in England for atypical haemolytic uraemic syndrome-the first year's experience. *QJM* 2016, 109(1):27-33.
5. Le Quintrec M, Zuber J, Moulin B, Kamar N, Jablonski M, Lionet A, Chatelet V, Mousson C, Mourad G, Bridoux F *et al*: Complement genes strongly predict recurrence and graft outcome in adult renal transplant recipients with atypical hemolytic and uremic syndrome. *Am J Transplant* 2013, 13(3):663-675.
6. Legendre CM, Licht C, Muus P, Greenbaum LA, Babu S, Bedrosian C, Bingham C, Cohen DJ, Delmas Y, Douglas K *et al*: Terminal complement inhibitor eculizumab in atypical hemolytic-uremic syndrome. *The New England journal of medicine* 2013, 368(23):2169-2181.
7. Greenbaum LA, Fila M, Ardissino G, Al-Akash SI, Evans J, Henning P, Lieberman KV, Maringhini S, Pape L, Rees L *et al*: Eculizumab is a safe and effective treatment in pediatric patients with atypical hemolytic uremic syndrome. *Kidney international* 2016, 89(3):701-711.
8. Fakhouri F, Hourmant M, Campistol JM, Cataland SR, Espinosa M, Gaber AO, Menne J, Minetti EE, Provot F, Rondeau E *et al*: Terminal Complement Inhibitor Eculizumab in Adult Patients With Atypical Hemolytic Uremic Syndrome: A Single-Arm, Open-Label Trial. *Am J Kidney Dis* 2016, 68(1):84-93.

- 1 9. Licht C, Greenbaum LA, Muus P, Babu S, Bedrosian CL, Cohen DJ, Delmas Y, Douglas K, Furman RR,  
2 Gaber OA *et al*: Efficacy and safety of eculizumab in atypical hemolytic uremic syndrome from 2-year  
3 extensions of phase 2 studies. *Kidney international* 2015, 87(5):1061-1073.
- 4 10. European Medicines Agency: [http://www.ema.europa.eu/docs/en\\_GB/document\\_library/EPAR\\_-](http://www.ema.europa.eu/docs/en_GB/document_library/EPAR_-_Assessment_Report_-_Variation/human/000791/WC500119185.pdf)  
5 [\\_Assessment\\_Report\\_-\\_Variation/human/000791/WC500119185.pdf](http://www.ema.europa.eu/docs/en_GB/document_library/EPAR_-_Assessment_Report_-_Variation/human/000791/WC500119185.pdf). 2011.
- 6 11. FDA:  
7 [http://www.fda.gov/AboutFDA/CentersOffices/OfficeofMedicalProductsandTobacco/CDER/ucm2730](http://www.fda.gov/AboutFDA/CentersOffices/OfficeofMedicalProductsandTobacco/CDER/ucm273089.htm)  
8 [89.htm](http://www.fda.gov/AboutFDA/CentersOffices/OfficeofMedicalProductsandTobacco/CDER/ucm273089.htm).  
9
- 10 12. [https://www.nice.org.uk/guidance/hst1/resources/eculizumab-for-treating-atypical-haemolytic-](https://www.nice.org.uk/guidance/hst1/resources/eculizumab-for-treating-atypical-haemolytic-uraemic-syndrome-1394895848389)  
11 [uraemic-syndrome-1394895848389](https://www.nice.org.uk/guidance/hst1/resources/eculizumab-for-treating-atypical-haemolytic-uraemic-syndrome-1394895848389)
- 12 13. Struijk GH, Bouts AH, Rijkers GT, Kuin EA, ten Berge IJ, Bemelman FJ: Meningococcal sepsis  
13 complicating eculizumab treatment despite prior vaccination. *Am J Transplant* 2013, 13(3):819-820.
- 14 14. McNamara LA, Topaz N, Wang X, Hariri S, Fox L, MacNeil JR: High Risk for Invasive Meningococcal  
15 Disease Among Patients Receiving Eculizumab (Soliris) Despite Receipt of Meningococcal Vaccine.  
16 *MMWR Morb Mortal Wkly Rep* 2017, 66(27):734-737.
- 17 15. Carr R, Cataland SR: Relapse of aHUS after discontinuation of therapy with eculizumab in a patient  
18 with aHUS and factor H mutation. *Annals of hematology* 2013, 92(6):845-846.
- 19 16. Ardissino G, Testa S, Possenti I, Tel F, Paglialonga F, Salardi S, Tedeschi S, Belingheri M, Cugno M:  
20 Discontinuation of eculizumab maintenance treatment for atypical hemolytic uremic syndrome: a  
21 report of 10 cases. *Am J Kidney Dis* 2014, 64(4):633-637.
- 22 17. Wijnsma KL, Duineveld C, Volokhina EB, van den Heuvel LP, van de Kar N, Wetzels JFM: Safety and  
23 effectiveness of restrictive eculizumab treatment in atypical haemolytic uremic syndrome. *Nephrol*  
24 *Dial Transplant* 2018, 33(4):635-645.
- 25 18. Fakhouri F, Fila M, Hummel A, Ribes D, Sellier-Leclerc AL, Ville S, Pouteil-Noble C, Coindre JP, Le  
26 Quintrec M, Rondeau E *et al*: Eculizumab discontinuation in children and adults with atypical  
27 haemolytic uremic syndrome: a prospective multicentric study. *Blood* 2020.
- 28 19. Johnson VE, Cook JD: Bayesian design of single-arm phase II clinical trials with continuous monitoring.  
29 *Clin Trials* 2009, 6(3):217-226.
- 30 20. Drummond MF, O'Brien B, Stoddart GL, Torrance GW: Basic Types of Economic Evaluation. In:  
31 *Methods for economic evaluation of health care programmes*. edn.: Oxford University Press; 2005.
- 32 21. Glaser BG. The Constant Comparative Method of Qualitative Analysis. *Social Problems* 1965,  
33 12(4):436-45.

## Acknowledgements

The authors would like to thank Dr Colin Muirhead who was responsible for the statistical proposal in the initial grant application.

The authors would also like to thank all the Principal Investigators for their contribution and support, the research nurses, the members of the TSC and DMC and all the patients involved in the SETS aHUS Trial.

## Author statement

Professor Neil Sheerin is the Chief Investigator and senior author of the SETS aHUS design and has led on grant acquisition and protocol development. Professor David Kavanagh, Dr Sally Johnson, Mr Len Woodward, Ms Jan Lecouturier, Dr Thomas Chadwick, and Dr Yemi Oluboyede are co-applicants of the grant and contributed to protocol development. Dr Sonya Carnell and Ms Sarah Dunn are part of the trial management team and contributed to protocol development. Mr Eoin Moloney is a Health Economist and contributed to protocol development. Mr Andy Bryant is a research statistician and contributed to protocol development. Mr Christopher Weetman is a data manager and contributed to protocol development.

This paper was drafted from the current approved version of the protocol; all authors commented and amended drafts of the paper. All authors read and approved the final manuscript.

## Funding

The SETS aHUS Trial is funded by the National Institute for Health Research (NIHR) Health Technology Assessment (HTA) Programme (project number 15/130/94). The views expressed are those of the authors and not necessarily those of the NIHR or the Department of Health and Social Care.

## Conflict of interests

SB has received honoraria for sitting on advisory boards for Alexion and Novartis. DK is a director of and scientific advisor to Gyroscope Therapeutics. DK received advisory board payments from Idorsia, Novartis, ChemoCentryx, Alexion, Apellis, Biomarin and Sarepta. DK's spouse works for GSK. MM has received honoraria for educational talks and honorarium for national lead of aHUS registry, both from Alexion and travel expenses from Alexion. EKS has received honoraria for lectures and/or advisory boards for Alexion Pharmaceutical, Biocryst and Novartis. LW has received expenses, honoraria and fees for advisory board participation and talks from Alexion and Roche. NS has given lectures or sat on advisory boards for Alexion Pharmaceutical, Roche, Astra Zeneca and Novartis, no personal honoraria, all payments made to the department.

## Patient and public involvement

Patients and/or the public were involved in the design, or conduct, or reporting, or dissemination plans of this research. Refer to the Methods section for further details.

## Patient consent for publication

Not required.

## Provenance and peer review

Not commissioned; externally peer reviewed during funding application process.

## World Health Organisation Trial Registration Set

|                                               |                                                                                                                                                                                                                                                                                                                                                                                                                                                                                                                                                                                                                                                                                                                                                                                                                                                                                                                                                                                                                                                                                                                                                                                                                                                                                                                                                                                     |
|-----------------------------------------------|-------------------------------------------------------------------------------------------------------------------------------------------------------------------------------------------------------------------------------------------------------------------------------------------------------------------------------------------------------------------------------------------------------------------------------------------------------------------------------------------------------------------------------------------------------------------------------------------------------------------------------------------------------------------------------------------------------------------------------------------------------------------------------------------------------------------------------------------------------------------------------------------------------------------------------------------------------------------------------------------------------------------------------------------------------------------------------------------------------------------------------------------------------------------------------------------------------------------------------------------------------------------------------------------------------------------------------------------------------------------------------------|
| Primary registry and trial identifying number | ISRCTN<br>ISRCTN17503205                                                                                                                                                                                                                                                                                                                                                                                                                                                                                                                                                                                                                                                                                                                                                                                                                                                                                                                                                                                                                                                                                                                                                                                                                                                                                                                                                            |
| Date of registration in primary registry      | 20 April 2018                                                                                                                                                                                                                                                                                                                                                                                                                                                                                                                                                                                                                                                                                                                                                                                                                                                                                                                                                                                                                                                                                                                                                                                                                                                                                                                                                                       |
| Secondary identifying numbers                 | EudraCT: 2017-003916-37                                                                                                                                                                                                                                                                                                                                                                                                                                                                                                                                                                                                                                                                                                                                                                                                                                                                                                                                                                                                                                                                                                                                                                                                                                                                                                                                                             |
| Source(s) of monetary or material support     | NIHR HTA                                                                                                                                                                                                                                                                                                                                                                                                                                                                                                                                                                                                                                                                                                                                                                                                                                                                                                                                                                                                                                                                                                                                                                                                                                                                                                                                                                            |
| Primary sponsor                               | Newcastle Upon Tyne Hospitals NHS FT – Christopher Price <a href="mailto:christoper.price6@nhs.uk">christoper.price6@nhs.uk</a>                                                                                                                                                                                                                                                                                                                                                                                                                                                                                                                                                                                                                                                                                                                                                                                                                                                                                                                                                                                                                                                                                                                                                                                                                                                     |
| Secondary sponsor(s)                          | N/A                                                                                                                                                                                                                                                                                                                                                                                                                                                                                                                                                                                                                                                                                                                                                                                                                                                                                                                                                                                                                                                                                                                                                                                                                                                                                                                                                                                 |
| Contact for public queries                    | Trial Manager – Sarah Dunn <a href="mailto:sarah.dunn2@newcastle.ac.uk">sarah.dunn2@newcastle.ac.uk</a>                                                                                                                                                                                                                                                                                                                                                                                                                                                                                                                                                                                                                                                                                                                                                                                                                                                                                                                                                                                                                                                                                                                                                                                                                                                                             |
| Contact for scientific queries                | Chief Investigator – Professor Neil Sheerin <a href="mailto:neil.sheerin@newcastle.ac.uk">neil.sheerin@newcastle.ac.uk</a>                                                                                                                                                                                                                                                                                                                                                                                                                                                                                                                                                                                                                                                                                                                                                                                                                                                                                                                                                                                                                                                                                                                                                                                                                                                          |
| Public title                                  | Stopping Eculizumab Treatment Safely in aHUS (SETS aHUS)                                                                                                                                                                                                                                                                                                                                                                                                                                                                                                                                                                                                                                                                                                                                                                                                                                                                                                                                                                                                                                                                                                                                                                                                                                                                                                                            |
| Scientific title                              | Multicentre, open label, prospective, single arm study of safety impact of Eculizumab withdrawal                                                                                                                                                                                                                                                                                                                                                                                                                                                                                                                                                                                                                                                                                                                                                                                                                                                                                                                                                                                                                                                                                                                                                                                                                                                                                    |
| Countries of recruitment                      | England and Scotland                                                                                                                                                                                                                                                                                                                                                                                                                                                                                                                                                                                                                                                                                                                                                                                                                                                                                                                                                                                                                                                                                                                                                                                                                                                                                                                                                                |
| Health condition(s) or problem(s) studied     | atypical Haemolytic Uraemic Syndrome                                                                                                                                                                                                                                                                                                                                                                                                                                                                                                                                                                                                                                                                                                                                                                                                                                                                                                                                                                                                                                                                                                                                                                                                                                                                                                                                                |
| Intervention(s)                               | Withdrawal of Eculizumab                                                                                                                                                                                                                                                                                                                                                                                                                                                                                                                                                                                                                                                                                                                                                                                                                                                                                                                                                                                                                                                                                                                                                                                                                                                                                                                                                            |
| Key inclusion and exclusion criteria          | <p>Key inclusion criteria:</p> <ul style="list-style-type: none"> <li>• Age ≥2+ years of age,</li> <li>• On Eculizumab treatment for at least 6 months,</li> <li>• In remission with no evidence of ongoing microangiopathic haemolytic anaemia (MAHA) activity at screening defined by: <ul style="list-style-type: none"> <li>- Platelet count &gt; lower limit of normal as determined by local reference range,</li> <li>- Lactate Dehydrogenase (LDH) &lt;x2 upper limit of normal as determined by local lab reference ranges,</li> </ul> </li> <li>• Normal renal function or Chronic Kidney Disease (CKD) stages 1-3,</li> <li>• Absence of decline of renal function confirmed by review of available assessments of renal function for the preceding 6 months by the Chief Investigator (CI) and clinical members of the Trial Management Group (TMG).</li> </ul> <p>Key Exclusion Criteria:</p> <ul style="list-style-type: none"> <li>• Severe non-renal disease manifestations at initial presentation with aHUS, which in the opinion of the Chief Investigator and/or the clinical members of the TMG makes the risk of treatment withdrawal unacceptable,</li> <li>• Current or planned pregnancy within the study duration,</li> <li>• Unable to give informed consent or assent, or unable to obtain parent/guardian consent if under 16 years of age,</li> </ul> |

|                         |                                                                                                                                                                                                                                                                                                                                                                                                                                                                                                                                                                                                                                                                                                                                                                                                                                                                                                                                                                                                                                                                                                                                                                                                                                                                                                                                                                                                                                                                   |
|-------------------------|-------------------------------------------------------------------------------------------------------------------------------------------------------------------------------------------------------------------------------------------------------------------------------------------------------------------------------------------------------------------------------------------------------------------------------------------------------------------------------------------------------------------------------------------------------------------------------------------------------------------------------------------------------------------------------------------------------------------------------------------------------------------------------------------------------------------------------------------------------------------------------------------------------------------------------------------------------------------------------------------------------------------------------------------------------------------------------------------------------------------------------------------------------------------------------------------------------------------------------------------------------------------------------------------------------------------------------------------------------------------------------------------------------------------------------------------------------------------|
|                         | <ul style="list-style-type: none"> <li>• Current participation in another clinical trial (not including participation in aHUS registries),</li> <li>• Severe, uncontrolled hypertension (systolic blood pressure &gt;160 mmHg) that is likely to induce at TMA.</li> </ul>                                                                                                                                                                                                                                                                                                                                                                                                                                                                                                                                                                                                                                                                                                                                                                                                                                                                                                                                                                                                                                                                                                                                                                                        |
| Study type              | <p>Allocation: non-randomized</p> <p>Masking: open label</p> <p>Primary purpose: Safety</p> <p>Phase IIb</p>                                                                                                                                                                                                                                                                                                                                                                                                                                                                                                                                                                                                                                                                                                                                                                                                                                                                                                                                                                                                                                                                                                                                                                                                                                                                                                                                                      |
| Date of first enrolment | November 2018                                                                                                                                                                                                                                                                                                                                                                                                                                                                                                                                                                                                                                                                                                                                                                                                                                                                                                                                                                                                                                                                                                                                                                                                                                                                                                                                                                                                                                                     |
| Target sample size      | 50: 30 withdrawal and 20 non-withdrawal                                                                                                                                                                                                                                                                                                                                                                                                                                                                                                                                                                                                                                                                                                                                                                                                                                                                                                                                                                                                                                                                                                                                                                                                                                                                                                                                                                                                                           |
| Recruitment status      | Recruiting                                                                                                                                                                                                                                                                                                                                                                                                                                                                                                                                                                                                                                                                                                                                                                                                                                                                                                                                                                                                                                                                                                                                                                                                                                                                                                                                                                                                                                                        |
| Primary outcome(s)      | To determine the safety of Eculizumab withdrawal in patients with aHUS                                                                                                                                                                                                                                                                                                                                                                                                                                                                                                                                                                                                                                                                                                                                                                                                                                                                                                                                                                                                                                                                                                                                                                                                                                                                                                                                                                                            |
| Key secondary outcomes  | <ol style="list-style-type: none"> <li>1. Measure the effectiveness of a monitoring protocol to detect disease relapse following withdrawal of Eculizumab.</li> <li>2. Describe the relapse rate after withdrawal of Eculizumab.</li> <li>3. Estimate the proportion of patients, currently on long-term treatment with Eculizumab, who can be maintained off treatment.</li> <li>4. Describe the period from withdrawal to relapse in those patients who restart treatment.</li> <li>5. Measure the change in estimated Glomerular Filtration rate (GFR) over the course of the study.</li> <li>6. Identify important clinical and laboratory indicators of imminent relapse.</li> <li>7. To assess the costs and health outcomes (measured in terms of adverse events and quality-adjusted life years (QALYs)) for patients on standard care (not withdrawing from Eculizumab treatment) over the two-year trial duration.</li> <li>8. To assess the costs and health outcomes for patients fully, or partially, withdrawing from Eculizumab treatment, and on a policy of protocolised monitoring, over the two-year trial duration.</li> <li>9. To model the costs and health consequences (measured in terms of QALYs) associated with Eculizumab withdrawal, and a policy of protocolised monitoring following withdrawal (and treatment re-introduction if necessary), compared with standard care, beyond the two-year timeframe of the trial.</li> </ol> |

|                                             | Central Pre-Screen | Site Screen and Consent | Final Infusion | Withdrawal Phase |   |   |   |   |   |   |   |    |    |    |    |    |    |    |    |    |    |    |    |    |    |    |    |    |    |    |    |    |    |    | Unscheduled Visit |    |    |    |    |  |
|---------------------------------------------|--------------------|-------------------------|----------------|------------------|---|---|---|---|---|---|---|----|----|----|----|----|----|----|----|----|----|----|----|----|----|----|----|----|----|----|----|----|----|----|-------------------|----|----|----|----|--|
| Month                                       | 0                  | 0                       | 0              | 1                |   |   | 2 |   |   | 3 |   |    | 4  |    |    | 5  |    |    | 6  |    |    | 7  | 8  | 9  | 10 | 11 | 12 | 13 | 14 | 15 | 16 | 17 | 18 | 19 | 20                | 21 | 22 | 23 | 24 |  |
| Visit Number                                | N/A                | N/A                     | 1              | 2                | 3 | 4 | 5 | 6 | 7 | 8 | 9 | 10 | 11 | 12 | 13 | 14 | 15 | 16 | 17 | 18 | 19 | 20 | 21 | 22 | 23 | 24 | 25 | 26 | 27 | 28 | 29 | 30 | 31 | 32 | 33                | 34 |    |    |    |  |
| Genetic Eligibility                         | X                  |                         |                |                  |   |   |   |   |   |   |   |    |    |    |    |    |    |    |    |    |    |    |    |    |    |    |    |    |    |    |    |    |    |    |                   |    |    |    |    |  |
| Medical History Review                      |                    | X                       |                |                  |   |   |   |   |   |   |   |    |    |    |    |    |    |    |    |    |    |    |    |    |    |    |    |    |    |    |    |    |    |    |                   |    |    |    |    |  |
| Informed consent                            |                    | X                       |                |                  |   |   |   |   |   |   |   |    |    |    |    |    |    |    |    |    |    |    |    |    |    |    |    |    |    |    |    |    |    |    |                   |    |    |    |    |  |
| Eligibility Checklist Completion            |                    | X                       |                |                  |   |   |   |   |   |   |   |    |    |    |    |    |    |    |    |    |    |    |    |    |    |    |    |    |    |    |    |    |    |    |                   |    |    |    |    |  |
| Physical Examination                        |                    | X                       |                |                  |   |   |   |   |   |   |   |    |    |    |    |    |    |    |    |    |    |    |    |    |    |    |    |    |    |    |    |    |    |    |                   |    | X  | X  |    |  |
| Height & Weight                             |                    | X                       |                |                  |   |   |   |   |   |   |   |    |    |    |    |    |    |    |    |    |    |    |    |    |    |    |    |    |    |    |    |    |    |    |                   |    |    |    |    |  |
| Pregnancy test                              |                    | X                       |                |                  |   |   |   |   |   |   |   |    |    |    |    |    |    |    |    |    |    |    |    |    |    |    |    |    |    |    |    |    |    |    |                   |    |    |    |    |  |
| Eculizumab Infusion                         |                    |                         | X              |                  |   |   |   |   |   |   |   |    |    |    |    |    |    |    |    |    |    |    |    |    |    |    |    |    |    |    |    |    |    |    |                   |    |    |    |    |  |
| meningococcal prophylaxis                   |                    |                         | X              | X                |   |   |   |   |   |   |   |    |    |    |    |    |    |    |    |    |    |    |    |    |    |    |    |    |    |    |    |    |    |    |                   |    |    |    |    |  |
| urine analysis training                     |                    |                         |                | X                |   |   |   |   |   |   |   |    |    |    |    |    |    |    |    |    |    |    |    |    |    |    |    |    |    |    |    |    |    |    |                   |    |    |    |    |  |
| Vital Signs                                 |                    | X                       |                | X                | X | X | X | X | X | X | X | X  | X  | X  | X  | X  | X  | X  | X  | X  | X  | X  | X  | X  | X  | X  | X  | X  | X  | X  | X  | X  | X  | X  | X                 | X  | X  | X  | X  |  |
| Concomitant medication Review               |                    | X                       |                | X                | X | X | X | X | X | X | X | X  | X  | X  | X  | X  | X  | X  | X  | X  | X  | X  | X  | X  | X  | X  | X  | X  | X  | X  | X  | X  | X  | X  | X                 | X  | X  | X  | X  |  |
| Renal Function (Creatinine & GFR)           |                    | X                       |                | X                | X | X | X | X | X | X | X | X  | X  | X  | X  | X  | X  | X  | X  | X  | X  | X  | X  | X  | X  | X  | X  | X  | X  | X  | X  | X  | X  | X  | X                 | X  | X  | X  | X  |  |
| Liver Function Tests                        |                    | X                       |                | X                | X | X | X | X | X | X | X | X  | X  | X  | X  | X  | X  | X  | X  | X  | X  | X  | X  | X  | X  | X  | X  | X  | X  | X  | X  | X  | X  | X  | X                 | X  | X  | X  | X  |  |
| Haemolysis markers (full blood count & LDH) |                    | X                       |                | X                | X | X | X | X | X | X | X | X  | X  | X  | X  | X  | X  | X  | X  | X  | X  | X  | X  | X  | X  | X  | X  | X  | X  | X  | X  | X  | X  | X  | X                 | X  | X  | X  | X  |  |
| Electrolyte profile (U&Es)                  |                    | X                       |                | X                | X | X | X | X | X | X | X | X  | X  | X  | X  | X  | X  | X  | X  | X  | X  | X  | X  | X  | X  | X  | X  | X  | X  | X  | X  | X  | X  | X  | X                 | X  | X  | X  | X  |  |
| Haptoglobin & Blood film                    |                    | X                       |                | X                |   |   | X |   |   |   | X |    |    |    |    |    | X  |    |    |    |    |    |    |    |    |    |    |    |    |    |    |    |    |    |                   | X  | X  |    |    |  |
| Urine PCR                                   |                    | X                       |                | X                |   |   | X |   |   |   | X |    |    |    |    |    | X  |    |    |    |    |    |    |    |    |    |    |    |    |    |    |    |    |    |                   | X  | X  |    |    |  |
| Biomarkers and complement activation sample |                    | X                       |                | X                | X | X | X | X | X | X | X |    |    |    |    |    | X  |    |    |    |    |    |    |    |    |    |    |    |    |    |    |    |    |    |                   | X  | X  |    |    |  |

|   |                                       |  |   |  |       |   |   |   |                  |   |   |   |   |   |   |   |   |   |   |   |   |   |   |   |   |   |   |   |   |   |   |   |   |   |   |   |   |   |
|---|---------------------------------------|--|---|--|-------|---|---|---|------------------|---|---|---|---|---|---|---|---|---|---|---|---|---|---|---|---|---|---|---|---|---|---|---|---|---|---|---|---|---|
| 1 | Home Urinalysis                       |  | X |  | Daily |   |   |   | 3 times per week |   |   |   |   |   |   |   |   |   |   |   |   |   |   |   |   |   |   |   |   |   |   |   |   |   |   |   |   |   |
| 2 | Home Urinalysis diary review          |  |   |  | X     | X | X | X | X                | X | X | X | X | X | X | X | X | X | X | X | X | X | X | X | X | X | X | X | X | X | X | X | X | X | X | X | X |   |
| 3 | Adverse Events                        |  |   |  | X     | X | X | X | X                | X | X | X | X | X | X | X | X | X | X | X | X | X | X | X | X | X | X | X | X | X | X | X | X | X | X | X | X | X |
| 4 | EQ5D & SF36                           |  |   |  | X     |   | X |   |                  |   |   |   |   |   |   | X |   |   |   |   | X |   |   |   |   |   |   |   |   |   |   |   |   |   |   | X |   |   |
| 5 | Health care Utilisation questionnaire |  |   |  | X     |   | X |   |                  |   |   |   |   |   |   | X |   |   |   |   | X |   |   |   |   |   |   |   |   |   |   |   |   |   |   | X |   |   |
| 6 | Time & Travel Questionnaire           |  |   |  |       |   |   |   |                  |   |   |   |   |   |   |   |   |   |   |   |   |   |   |   |   |   |   |   |   |   |   |   |   |   |   | X |   |   |

For peer review only



| Follow - up                           |   |   |   |   |   |   |   |   |    |   |    |   |    |   |
|---------------------------------------|---|---|---|---|---|---|---|---|----|---|----|---|----|---|
| month                                 | 1 |   | 3 |   | 6 |   | 9 |   | 12 |   | 18 |   | 24 |   |
| visit number                          | 1 | 2 | 3 | 4 | 5 | 6 | 7 | 8 |    |   |    |   |    |   |
| Medical History Review                | X |   |   |   |   |   |   |   |    |   |    |   |    |   |
| Informed consent                      | X |   |   |   |   |   |   |   |    |   |    |   |    |   |
| Eligibility Checklist                 | X |   |   |   |   |   |   |   |    |   |    |   |    |   |
| EQ5D & SF36                           | X | X | X | X | X | X | X | X | X  | X | X  | X | X  | X |
| Health care Utilisation questionnaire | X | X | X | X | X | X | X | X | X  | X | X  | X | X  | X |
| Time & Travel Questionnaire           |   |   |   |   |   |   |   |   |    |   |    | X |    |   |

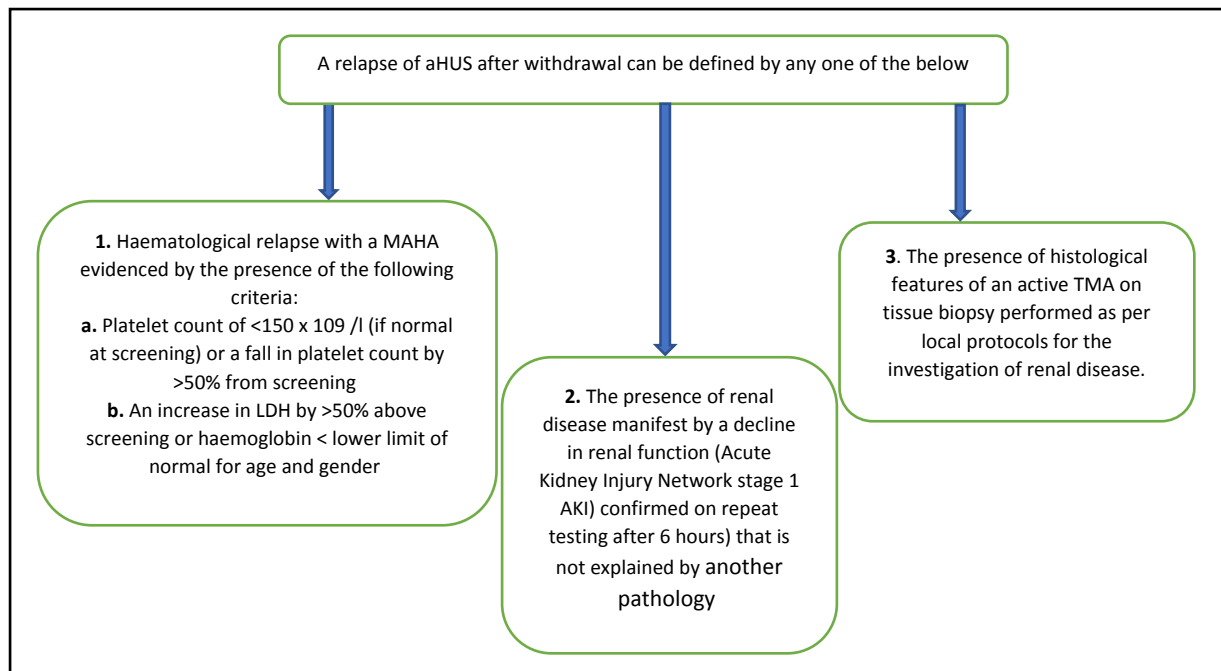

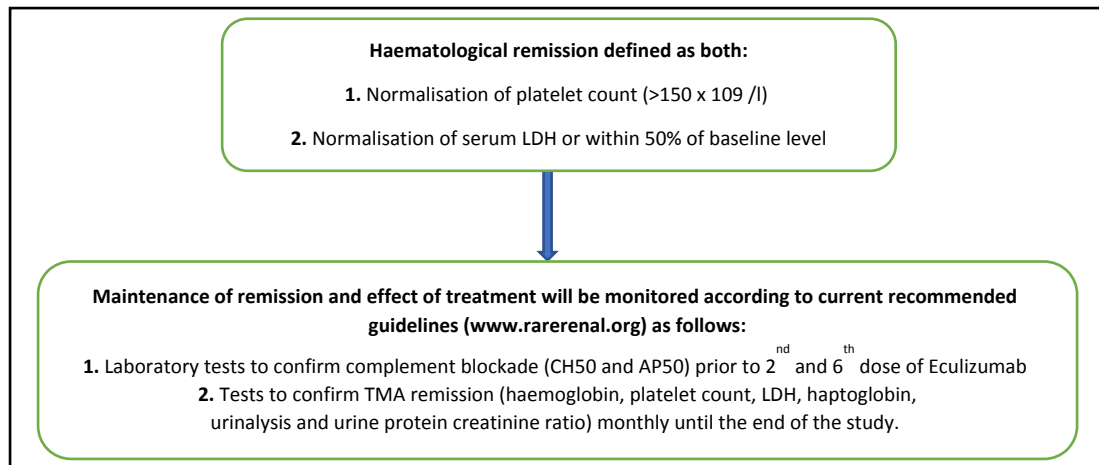

# Reporting checklist for protocol of a clinical trial.

Based on the SPIRIT guidelines.

## Instructions to authors

Complete this checklist by entering the page numbers from your manuscript where readers will find each of the items listed below.

Your article may not currently address all the items on the checklist. Please modify your text to include the missing information. If you are certain that an item does not apply, please write "n/a" and provide a short explanation.

Upload your completed checklist as an extra file when you submit to a journal.

In your methods section, say that you used the SPIRIT reporting guidelines, and cite them as:

Chan A-W, Tetzlaff JM, Gøtzsche PC, Altman DG, Mann H, Berlin J, Dickersin K, Hróbjartsson A, Schulz KF, Parulekar WR, Krleža-Jerić K, Laupacis A, Moher D. SPIRIT 2013 Explanation and Elaboration: Guidance for protocols of clinical trials. *BMJ*. 2013;346:e7586

|                                   | Reporting Item                                                                                                                  | Page Number |
|-----------------------------------|---------------------------------------------------------------------------------------------------------------------------------|-------------|
| <b>Administrative information</b> |                                                                                                                                 |             |
| Title                             | <a href="#">#1</a> Descriptive title identifying the study design, population, interventions, and, if applicable, trial acronym | 1           |

|    |                     |                     |                                     |                                       |
|----|---------------------|---------------------|-------------------------------------|---------------------------------------|
| 1  | Trial registration  | <a href="#">#2a</a> | Trial identifier and registry name. | 3                                     |
| 2  |                     |                     |                                     |                                       |
| 3  |                     |                     | If not yet registered, name of      |                                       |
| 4  |                     |                     | intended registry                   |                                       |
| 5  |                     |                     |                                     |                                       |
| 6  |                     |                     |                                     |                                       |
| 7  |                     |                     |                                     |                                       |
| 8  |                     |                     |                                     |                                       |
| 9  | Trial registration: | <a href="#">#2b</a> | All items from the World Health     | 19                                    |
| 10 |                     |                     |                                     |                                       |
| 11 | data set            |                     | Organization Trial Registration     |                                       |
| 12 |                     |                     |                                     |                                       |
| 13 |                     |                     | Data Set                            |                                       |
| 14 |                     |                     |                                     |                                       |
| 15 |                     |                     |                                     |                                       |
| 16 | Protocol version    | <a href="#">#3</a>  | Date and version identifier         | 3                                     |
| 17 |                     |                     |                                     |                                       |
| 18 |                     |                     |                                     |                                       |
| 19 | Funding             | <a href="#">#4</a>  | Sources and types of financial,     | 16                                    |
| 20 |                     |                     | material, and other support         |                                       |
| 21 |                     |                     |                                     |                                       |
| 22 |                     |                     |                                     |                                       |
| 23 |                     |                     |                                     |                                       |
| 24 |                     |                     |                                     |                                       |
| 25 | Roles and           | <a href="#">#5a</a> | Names, affiliations, and roles of   | 1                                     |
| 26 |                     |                     |                                     |                                       |
| 27 | responsibilities:   |                     | protocol contributors               |                                       |
| 28 |                     |                     |                                     |                                       |
| 29 | contributorship     |                     |                                     |                                       |
| 30 |                     |                     |                                     |                                       |
| 31 |                     |                     |                                     |                                       |
| 32 |                     |                     |                                     |                                       |
| 33 | Roles and           | <a href="#">#5b</a> | Name and contact information for    | 13 and 17                             |
| 34 |                     |                     |                                     |                                       |
| 35 | responsibilities:   |                     | the trial sponsor                   |                                       |
| 36 |                     |                     |                                     |                                       |
| 37 | sponsor contact     |                     |                                     |                                       |
| 38 |                     |                     |                                     |                                       |
| 39 | information         |                     |                                     |                                       |
| 40 |                     |                     |                                     |                                       |
| 41 |                     |                     |                                     |                                       |
| 42 |                     |                     |                                     |                                       |
| 43 | Roles and           | <a href="#">#5c</a> | Role of study sponsor and           | NA – sponsor and funder do not        |
| 44 |                     |                     |                                     |                                       |
| 45 | responsibilities:   |                     | funders, if any, in study design;   | have involvement in these activities. |
| 46 |                     |                     |                                     |                                       |
| 47 | sponsor and         |                     | collection, management, analysis,   |                                       |
| 48 |                     |                     |                                     |                                       |
| 49 | funder              |                     | and interpretation of data; writing |                                       |
| 50 |                     |                     |                                     |                                       |
| 51 |                     |                     | of the report; and the decision to  |                                       |
| 52 |                     |                     |                                     |                                       |
| 53 |                     |                     | submit the report for publication,  |                                       |
| 54 |                     |                     |                                     |                                       |
| 55 |                     |                     | including whether they will have    |                                       |
| 56 |                     |                     |                                     |                                       |
| 57 |                     |                     |                                     |                                       |
| 58 |                     |                     |                                     |                                       |
| 59 |                     |                     |                                     |                                       |
| 60 |                     |                     |                                     |                                       |

1 ultimate authority over any of

2 these activities

3  
4  
5  
6 Roles and [#5d](#) Composition, roles, and 11, 12 and 13  
7 responsibilities: responsibilities of the coordinating  
8 committees centre, steering committee,  
9 endpoint adjudication committee,  
10 data management team, and  
11 other individuals or groups  
12 overseeing the trial, if applicable  
13 (see Item 21a for data monitoring  
14 committee)  
15  
16  
17  
18  
19  
20  
21  
22  
23  
24  
25  
26

## 27 Introduction

28  
29  
30 Background and [#6a](#) Description of research question 4  
31 rationale and justification for undertaking  
32 the trial, including summary of  
33 relevant studies (published and  
34 unpublished) examining benefits  
35 and harms for each intervention  
36  
37  
38  
39  
40  
41  
42  
43

44 Background and [#6b](#) Explanation for choice of n/a – the trial withdraws patients  
45 rationale: choice of comparators from their current medication, no  
46 of comparators comparator required  
47  
48  
49  
50

51  
52 Objectives [#7](#) Specific objectives or hypotheses 4 and 5  
53

54  
55 Trial design [#8](#) Description of trial design 4  
56 including type of trial (eg, parallel  
57  
58  
59

group, crossover, factorial, single  
 group), allocation ratio, and  
 framework (eg, superiority,  
 equivalence, non-inferiority,  
 exploratory)

## Methods:

### Participants, interventions, and outcomes

- Study setting [#9](#) Description of study settings (eg, 6  
 community clinic, academic  
 hospital) and list of countries  
 where data will be collected.  
 Reference to where list of study  
 sites can be obtained
- Eligibility criteria [#10](#) Inclusion and exclusion criteria for 6  
 participants. If applicable,  
 eligibility criteria for study centres  
 and individuals who will perform  
 the interventions (eg, surgeons,  
 psychotherapists)
- Interventions: [#11a](#) Interventions for each group with 7  
 description sufficient detail to allow  
 replication, including how and  
 when they will be administered

|    |                  |                      |                                     |                                   |
|----|------------------|----------------------|-------------------------------------|-----------------------------------|
| 1  | Interventions:   | <a href="#">#11b</a> | Criteria for discontinuing or       | 9                                 |
| 2  |                  |                      |                                     |                                   |
| 3  | modifications    |                      | modifying allocated interventions   |                                   |
| 4  |                  |                      | for a given trial participant (eg,  |                                   |
| 5  |                  |                      | drug dose change in response to     |                                   |
| 6  |                  |                      | harms, participant request, or      |                                   |
| 7  |                  |                      | improving / worsening disease)      |                                   |
| 8  |                  |                      |                                     |                                   |
| 9  |                  |                      |                                     |                                   |
| 10 |                  |                      |                                     |                                   |
| 11 |                  |                      |                                     |                                   |
| 12 |                  |                      |                                     |                                   |
| 13 |                  |                      |                                     |                                   |
| 14 |                  |                      |                                     |                                   |
| 15 | Interventions:   | <a href="#">#11c</a> | Strategies to improve adherence     | 9 – monitoring of home urinalysis |
| 16 |                  |                      |                                     |                                   |
| 17 | adherence        |                      | to intervention protocols, and any  |                                   |
| 18 |                  |                      | procedures for monitoring           |                                   |
| 19 |                  |                      | adherence (eg, drug tablet return;  |                                   |
| 20 |                  |                      | laboratory tests)                   |                                   |
| 21 |                  |                      |                                     |                                   |
| 22 |                  |                      |                                     |                                   |
| 23 |                  |                      |                                     |                                   |
| 24 |                  |                      |                                     |                                   |
| 25 |                  |                      |                                     |                                   |
| 26 |                  |                      |                                     |                                   |
| 27 |                  |                      |                                     |                                   |
| 28 | Interventions:   | <a href="#">#11d</a> | Relevant concomitant care and       | 7 – relating to meningococcal     |
| 29 |                  |                      |                                     |                                   |
| 30 | concomitant care |                      | interventions that are permitted or | prophylaxis. No other concomitant |
| 31 |                  |                      | prohibited during the trial         | medication requirements imposed   |
| 32 |                  |                      |                                     | by the trial                      |
| 33 |                  |                      |                                     |                                   |
| 34 |                  |                      |                                     |                                   |
| 35 |                  |                      |                                     |                                   |
| 36 |                  |                      |                                     |                                   |
| 37 | Outcomes         | <a href="#">#12</a>  | Primary, secondary, and other       | 5                                 |
| 38 |                  |                      |                                     |                                   |
| 39 |                  |                      | outcomes, including the specific    |                                   |
| 40 |                  |                      | measurement variable (eg,           |                                   |
| 41 |                  |                      | systolic blood pressure), analysis  |                                   |
| 42 |                  |                      | metric (eg, change from baseline,   |                                   |
| 43 |                  |                      | final value, time to event), method |                                   |
| 44 |                  |                      | of aggregation (eg, median,         |                                   |
| 45 |                  |                      | proportion), and time point for     |                                   |
| 46 |                  |                      | each outcome. Explanation of the    |                                   |
| 47 |                  |                      | clinical relevance of chosen        |                                   |
| 48 |                  |                      |                                     |                                   |
| 49 |                  |                      |                                     |                                   |
| 50 |                  |                      |                                     |                                   |
| 51 |                  |                      |                                     |                                   |
| 52 |                  |                      |                                     |                                   |
| 53 |                  |                      |                                     |                                   |
| 54 |                  |                      |                                     |                                   |
| 55 |                  |                      |                                     |                                   |
| 56 |                  |                      |                                     |                                   |
| 57 |                  |                      |                                     |                                   |
| 58 |                  |                      |                                     |                                   |
| 59 |                  |                      |                                     |                                   |
| 60 |                  |                      |                                     |                                   |



efficacy and harm outcomes is

strongly recommended

|    |             |                     |                                           |
|----|-------------|---------------------|-------------------------------------------|
| 1  |             |                     |                                           |
| 2  |             |                     |                                           |
| 3  |             |                     |                                           |
| 4  |             |                     |                                           |
| 5  |             |                     |                                           |
| 6  | Participant | <a href="#">#13</a> | Time schedule of enrolment, 7             |
| 7  |             |                     |                                           |
| 8  | timeline    |                     | interventions (including any run-         |
| 9  |             |                     |                                           |
| 10 |             |                     | ins and washouts), assessments,           |
| 11 |             |                     |                                           |
| 12 |             |                     | and visits for participants. A            |
| 13 |             |                     |                                           |
| 14 |             |                     | schematic diagram is highly               |
| 15 |             |                     | recommended (see Figure)                  |
| 16 |             |                     |                                           |
| 17 |             |                     |                                           |
| 18 |             |                     |                                           |
| 19 |             |                     |                                           |
| 20 | Sample size | <a href="#">#14</a> | Estimated number of participants 6 and 10 |
| 21 |             |                     |                                           |
| 22 |             |                     | needed to achieve study                   |
| 23 |             |                     |                                           |
| 24 |             |                     | objectives and how it was                 |
| 25 |             |                     |                                           |
| 26 |             |                     | determined, including clinical and        |
| 27 |             |                     |                                           |
| 28 |             |                     | statistical assumptions supporting        |
| 29 |             |                     |                                           |
| 30 |             |                     | any sample size calculations              |
| 31 |             |                     |                                           |
| 32 |             |                     |                                           |
| 33 |             |                     |                                           |
| 34 | Recruitment | <a href="#">#15</a> | Strategies for achieving adequate 6       |
| 35 |             |                     |                                           |
| 36 |             |                     | participant enrolment to reach            |
| 37 |             |                     |                                           |
| 38 |             |                     | target sample size                        |
| 39 |             |                     |                                           |
| 40 |             |                     |                                           |
| 41 |             |                     |                                           |

## Methods:

### Assignment of interventions (for controlled trials)

|    |             |                      |                           |                          |
|----|-------------|----------------------|---------------------------|--------------------------|
| 52 | Allocation: | <a href="#">#16a</a> | Method of generating the  | NA- non-randomised trial |
| 53 |             |                      |                           |                          |
| 54 | sequence    |                      | allocation sequence (eg,  |                          |
| 55 |             |                      |                           |                          |
| 56 | generation  |                      | computer-generated random |                          |
| 57 |             |                      |                           |                          |
| 58 |             |                      |                           |                          |
| 59 |             |                      |                           |                          |

1 numbers), and list of any factors  
 2  
 3 for stratification. To reduce  
 4  
 5 predictability of a random  
 6  
 7 sequence, details of any planned  
 8  
 9 restriction (eg, blocking) should  
 10  
 11 be provided in a separate  
 12  
 13 document that is unavailable to  
 14  
 15 those who enrol participants or  
 16  
 17 assign interventions  
 18  
 19  
 20

|                                                 |                      |                                                                                                                                                                                                                                                                                            |                             |
|-------------------------------------------------|----------------------|--------------------------------------------------------------------------------------------------------------------------------------------------------------------------------------------------------------------------------------------------------------------------------------------|-----------------------------|
| 21 Allocation<br>22 concealment<br>23 mechanism | <a href="#">#16b</a> | 24 Mechanism of implementing the<br>25 allocation sequence (eg, central<br>26 telephone; sequentially<br>27 numbered, opaque, sealed<br>28 envelopes), describing any steps<br>29 to conceal the sequence until<br>30 interventions are assigned<br>31<br>32<br>33<br>34<br>35<br>36<br>37 | 38 NA- non-blinded          |
| 39 Allocation:<br>40 implementation             | <a href="#">#16c</a> | 41 Who will generate the allocation<br>42 sequence, who will enrol<br>43 participants, and who will assign<br>44 participants to interventions<br>45<br>46<br>47                                                                                                                           | 48 NA- non-randomised trial |
| 49 Blinding<br>50 (masking)                     | <a href="#">#17a</a> | 51 Who will be blinded after<br>52 assignment to interventions (eg,<br>53 trial participants, care providers,<br>54 outcome assessors, data<br>55 analysts), and how<br>56<br>57<br>58<br>59                                                                                               | 60 N/A – non-blinded        |

1 Blinding [#17b](#) If blinded, circumstances under NA – non-blinded  
 2  
 3 (masking): which unblinding is permissible,  
 4  
 5 emergency and procedure for revealing a  
 6  
 7 unblinding participant's allocated intervention  
 8  
 9 during the trial  
 10  
 11  
 12

### 13 **Methods: Data**

14 **collection,**  
 15  
 16 **management,**  
 17  
 18 **and analysis**  
 19  
 20  
 21  
 22

23 Data collection [#18a](#) Plans for assessment and 7  
 24  
 25 plan collection of outcome, baseline,  
 26  
 27 and other trial data, including any  
 28  
 29 related processes to promote  
 30  
 31 data quality (eg, duplicate  
 32  
 33 measurements, training of  
 34  
 35 assessors) and a description of  
 36  
 37 study instruments (eg,  
 38  
 39 questionnaires, laboratory tests)  
 40  
 41 along with their reliability and  
 42  
 43 validity, if known. Reference to  
 44  
 45 where data collection forms can  
 46  
 47 be found, if not in the protocol  
 48  
 49  
 50  
 51  
 52

53 Data collection [#18b](#) Plans to promote participant 9, 12 and 13  
 54  
 55 plan: retention retention and complete follow-up,  
 56  
 57 including list of any outcome data  
 58  
 59  
 60

to be collected for participants  
 who discontinue or deviate from  
 intervention protocols

|                                                                                                                                                                                               |                                                         |                             |                                                                                                                                                                                                                                                                          |                      |
|-----------------------------------------------------------------------------------------------------------------------------------------------------------------------------------------------|---------------------------------------------------------|-----------------------------|--------------------------------------------------------------------------------------------------------------------------------------------------------------------------------------------------------------------------------------------------------------------------|----------------------|
| <p>1<br/>2<br/>3<br/>4<br/>5<br/>6<br/>7<br/>8<br/>9<br/>10<br/>11<br/>12<br/>13<br/>14<br/>15<br/>16<br/>17<br/>18<br/>19<br/>20<br/>21<br/>22<br/>23<br/>24<br/>25<br/>26<br/>27<br/>28</p> | <p>Data management</p>                                  | <p><a href="#">#19</a></p>  | <p>Plans for data entry, coding, security, and storage, including any related processes to promote data quality (eg, double data entry; range checks for data values). Reference to where details of data management procedures can be found, if not in the protocol</p> | <p>13</p>            |
| <p>29<br/>30<br/>31<br/>32<br/>33<br/>34<br/>35<br/>36<br/>37<br/>38<br/>39<br/>40</p>                                                                                                        | <p>Statistics: outcomes</p>                             | <p><a href="#">#20a</a></p> | <p>Statistical methods for analysing primary and secondary outcomes. Reference to where other details of the statistical analysis plan can be found, if not in the protocol</p>                                                                                          | <p>10, 12 and 13</p> |
| <p>41<br/>42<br/>43<br/>44<br/>45<br/>46<br/>47<br/>48</p>                                                                                                                                    | <p>Statistics: additional analyses</p>                  | <p><a href="#">#20b</a></p> | <p>Methods for any additional analyses (eg, subgroup and adjusted analyses)</p>                                                                                                                                                                                          | <p>12 and 13</p>     |
| <p>49<br/>50<br/>51<br/>52<br/>53<br/>54<br/>55<br/>56<br/>57<br/>58<br/>59<br/>60</p>                                                                                                        | <p>Statistics: analysis population and missing data</p> | <p><a href="#">#20c</a></p> | <p>Definition of analysis population relating to protocol non-adherence (eg, as randomised analysis), and any statistical</p>                                                                                                                                            | <p>12</p>            |

1 methods to handle missing data

2  
3 (eg, multiple imputation)

4  
5  
6 **Methods:**

7  
8 **Monitoring**

9  
10  
11 Data monitoring: [#21a](#) Composition of data monitoring 11,12 and 13

12 formal committee committee (DMC); summary of its

13 role and reporting structure;

14 statement of whether it is

15 independent from the sponsor

16 and competing interests; and

17 reference to where further details

18 about its charter can be found, if

19 not in the protocol. Alternatively,

20 an explanation of why a DMC is

21 not needed

22  
23  
24  
25  
26  
27  
28  
29  
30  
31  
32  
33  
34  
35  
36 Data monitoring: [#21b](#) Description of any interim 11 and 12

37 interim analysis analyses and stopping guidelines,

38 including who will have access to

39 these interim results and make

40 the final decision to terminate the

41 trial

42  
43  
44  
45  
46  
47  
48  
49  
50 Harms [#22](#) Plans for collecting, assessing, 9 and 10

51 reporting, and managing solicited

52 and spontaneously reported

53 adverse events and other

|    |                      |                      |                                       |    |
|----|----------------------|----------------------|---------------------------------------|----|
| 1  |                      |                      | unintended effects of trial           |    |
| 2  |                      |                      | interventions or trial conduct        |    |
| 3  |                      |                      |                                       |    |
| 4  |                      |                      |                                       |    |
| 5  |                      |                      |                                       |    |
| 6  | Auditing             | <a href="#">#23</a>  | Frequency and procedures for          | 13 |
| 7  |                      |                      | auditing trial conduct, if any, and   |    |
| 8  |                      |                      | whether the process will be           |    |
| 9  |                      |                      | independent from investigators        |    |
| 10 |                      |                      | and the sponsor                       |    |
| 11 |                      |                      |                                       |    |
| 12 |                      |                      |                                       |    |
| 13 |                      |                      |                                       |    |
| 14 |                      |                      |                                       |    |
| 15 |                      |                      |                                       |    |
| 16 |                      |                      |                                       |    |
| 17 |                      |                      |                                       |    |
| 18 | <b>Ethics and</b>    |                      |                                       |    |
| 19 |                      |                      |                                       |    |
| 20 | <b>dissemination</b> |                      |                                       |    |
| 21 |                      |                      |                                       |    |
| 22 |                      |                      |                                       |    |
| 23 | Research ethics      | <a href="#">#24</a>  | Plans for seeking research ethics     | 14 |
| 24 |                      |                      | committee / institutional review      |    |
| 25 | approval             |                      | board (REC / IRB) approval            |    |
| 26 |                      |                      |                                       |    |
| 27 |                      |                      |                                       |    |
| 28 |                      |                      |                                       |    |
| 29 |                      |                      |                                       |    |
| 30 |                      |                      |                                       |    |
| 31 | Protocol             | <a href="#">#25</a>  | Plans for communicating               | 13 |
| 32 |                      |                      | important protocol modifications      |    |
| 33 | amendments           |                      | (eg, changes to eligibility criteria, |    |
| 34 |                      |                      | outcomes, analyses) to relevant       |    |
| 35 |                      |                      | parties (eg, investigators, REC /     |    |
| 36 |                      |                      | IRBs, trial participants, trial       |    |
| 37 |                      |                      | registries, journals, regulators)     |    |
| 38 |                      |                      |                                       |    |
| 39 |                      |                      |                                       |    |
| 40 |                      |                      |                                       |    |
| 41 |                      |                      |                                       |    |
| 42 |                      |                      |                                       |    |
| 43 |                      |                      |                                       |    |
| 44 |                      |                      |                                       |    |
| 45 |                      |                      |                                       |    |
| 46 |                      |                      |                                       |    |
| 47 | Consent or           | <a href="#">#26a</a> | Who will obtain informed consent      | 7  |
| 48 |                      |                      | or assent from potential trial        |    |
| 49 | assent               |                      | participants or authorised            |    |
| 50 |                      |                      | surrogates, and how (see Item         |    |
| 51 |                      |                      | 32)                                   |    |
| 52 |                      |                      |                                       |    |
| 53 |                      |                      |                                       |    |
| 54 |                      |                      |                                       |    |
| 55 |                      |                      |                                       |    |
| 56 |                      |                      |                                       |    |
| 57 |                      |                      |                                       |    |
| 58 |                      |                      |                                       |    |
| 59 |                      |                      |                                       |    |
| 60 |                      |                      |                                       |    |

|    |                    |                      |                                     |                                  |
|----|--------------------|----------------------|-------------------------------------|----------------------------------|
| 1  | Consent or         | <a href="#">#26b</a> | Additional consent provisions for   | 7                                |
| 2  |                    |                      |                                     |                                  |
| 3  | assent: ancillary  |                      | collection and use of participant   |                                  |
| 4  |                    |                      |                                     |                                  |
| 5  | studies            |                      | data and biological specimens in    |                                  |
| 6  |                    |                      |                                     |                                  |
| 7  |                    |                      | ancillary studies, if applicable    |                                  |
| 8  |                    |                      |                                     |                                  |
| 9  |                    |                      |                                     |                                  |
| 10 |                    |                      |                                     |                                  |
| 11 | Confidentiality    | <a href="#">#27</a>  | How personal information about      | 13                               |
| 12 |                    |                      |                                     |                                  |
| 13 |                    |                      | potential and enrolled participants |                                  |
| 14 |                    |                      |                                     |                                  |
| 15 |                    |                      | will be collected, shared, and      |                                  |
| 16 |                    |                      |                                     |                                  |
| 17 |                    |                      | maintained in order to protect      |                                  |
| 18 |                    |                      |                                     |                                  |
| 19 |                    |                      | confidentiality before, during, and |                                  |
| 20 |                    |                      |                                     |                                  |
| 21 |                    |                      | after the trial                     |                                  |
| 22 |                    |                      |                                     |                                  |
| 23 |                    |                      |                                     |                                  |
| 24 |                    |                      |                                     |                                  |
| 25 | Declaration of     | <a href="#">#28</a>  | Financial and other competing       | 16                               |
| 26 |                    |                      |                                     |                                  |
| 27 | interests          |                      | interests for principal             |                                  |
| 28 |                    |                      |                                     |                                  |
| 29 |                    |                      | investigators for the overall trial |                                  |
| 30 |                    |                      |                                     |                                  |
| 31 |                    |                      | and each study site                 |                                  |
| 32 |                    |                      |                                     |                                  |
| 33 |                    |                      |                                     |                                  |
| 34 |                    |                      |                                     |                                  |
| 35 | Data access        | <a href="#">#29</a>  | Statement of who will have          | 13                               |
| 36 |                    |                      |                                     |                                  |
| 37 |                    |                      | access to the final trial dataset,  |                                  |
| 38 |                    |                      |                                     |                                  |
| 39 |                    |                      | and disclosure of contractual       |                                  |
| 40 |                    |                      |                                     |                                  |
| 41 |                    |                      | agreements that limit such access   |                                  |
| 42 |                    |                      |                                     |                                  |
| 43 |                    |                      | for investigators                   |                                  |
| 44 |                    |                      |                                     |                                  |
| 45 |                    |                      |                                     |                                  |
| 46 |                    |                      |                                     |                                  |
| 47 | Ancillary and post | <a href="#">#30</a>  | Provisions, if any, for ancillary   | 7 – post trial safety monitoring |
| 48 |                    |                      |                                     |                                  |
| 49 | trial care         |                      | and post-trial care, and for        |                                  |
| 50 |                    |                      |                                     |                                  |
| 51 |                    |                      | compensation to those who suffer    |                                  |
| 52 |                    |                      |                                     |                                  |
| 53 |                    |                      | harm from trial participation       |                                  |
| 54 |                    |                      |                                     |                                  |
| 55 |                    |                      |                                     |                                  |
| 56 |                    |                      |                                     |                                  |
| 57 |                    |                      |                                     |                                  |
| 58 |                    |                      |                                     |                                  |
| 59 |                    |                      |                                     |                                  |
| 60 |                    |                      |                                     |                                  |

|    |                       |                      |                                     |                                                                              |
|----|-----------------------|----------------------|-------------------------------------|------------------------------------------------------------------------------|
| 1  | Dissemination         | <a href="#">#31a</a> | Plans for investigators and         | 14                                                                           |
| 2  |                       |                      |                                     |                                                                              |
| 3  | policy: trial results |                      | sponsor to communicate trial        |                                                                              |
| 4  |                       |                      | results to participants, healthcare |                                                                              |
| 5  |                       |                      | professionals, the public, and      |                                                                              |
| 6  |                       |                      | other relevant groups (eg, via      |                                                                              |
| 7  |                       |                      | publication, reporting in results   |                                                                              |
| 8  |                       |                      | databases, or other data sharing    |                                                                              |
| 9  |                       |                      | arrangements), including any        |                                                                              |
| 10 |                       |                      | publication restrictions            |                                                                              |
| 11 |                       |                      |                                     |                                                                              |
| 12 | Dissemination         | <a href="#">#31b</a> | Authorship eligibility guidelines   | 16                                                                           |
| 13 |                       |                      |                                     |                                                                              |
| 14 | policy: authorship    |                      | and any intended use of             |                                                                              |
| 15 |                       |                      | professional writers                |                                                                              |
| 16 |                       |                      |                                     |                                                                              |
| 17 | Dissemination         | <a href="#">#31c</a> | Plans, if any, for granting public  | 13                                                                           |
| 18 |                       |                      |                                     |                                                                              |
| 19 | policy:               |                      | access to the full protocol,        |                                                                              |
| 20 | reproducible          |                      | participant-level dataset, and      |                                                                              |
| 21 | research              |                      | statistical code                    |                                                                              |
| 22 |                       |                      |                                     |                                                                              |
| 23 | <b>Appendices</b>     |                      |                                     |                                                                              |
| 24 |                       |                      |                                     |                                                                              |
| 25 | Informed consent      | <a href="#">#32</a>  | Model consent form and other        | N/A – not included but can be                                                |
| 26 | materials             |                      | related documentation given to      | requested from the Trial Manager                                             |
| 27 |                       |                      | participants and authorised         | Sarah Dunn                                                                   |
| 28 |                       |                      | surrogates                          | <a href="mailto:sarah.dunn2@newcastle.ac.uk">sarah.dunn2@newcastle.ac.uk</a> |
| 29 |                       |                      |                                     |                                                                              |
| 30 | Biological            | <a href="#">#33</a>  | Plans for collection, laboratory    | N/A – not included, laboratory                                               |
| 31 | specimens             |                      | evaluation, and storage of          | manual can be requested from the                                             |
| 32 |                       |                      | biological specimens for genetic    |                                                                              |



1 or molecular analysis in the Trial Manager Sarah Dunn  
2  
3 current trial and for future use in [sarah.dunn2@newcastle.ac.uk](mailto:sarah.dunn2@newcastle.ac.uk)  
4  
5 ancillary studies, if applicable  
6  
7

8 None The SPIRIT Explanation and Elaboration paper is distributed under the terms of the Creative  
9  
10 Commons Attribution License CC-BY-NC. This checklist can be completed online using  
11  
12 <https://www.goodreports.org/>, a tool made by the [EQUATOR Network](#) in collaboration with  
13  
14 [Penelope.ai](#)  
15  
16  
17  
18  
19  
20  
21  
22  
23  
24  
25  
26  
27  
28  
29  
30  
31  
32  
33  
34  
35  
36  
37  
38  
39  
40  
41  
42  
43  
44  
45  
46  
47  
48  
49  
50  
51  
52  
53  
54  
55  
56  
57  
58  
59  
60

# BMJ Open

## Protocol for a multicentre, open label, prospective, single arm study of the safety and impact of eculizumab withdrawal in patients with atypical haemolytic uraemic syndrome

|                                 |                                                                                                                                                                                                                                                                                                                                                                                                                                                                                                                                                                                                                                                                                                                                                                                                                                                                                                                                                                                                                                                                                                                                                                                                                                                                                                                                                                                                                                                                                                                                                                                                       |
|---------------------------------|-------------------------------------------------------------------------------------------------------------------------------------------------------------------------------------------------------------------------------------------------------------------------------------------------------------------------------------------------------------------------------------------------------------------------------------------------------------------------------------------------------------------------------------------------------------------------------------------------------------------------------------------------------------------------------------------------------------------------------------------------------------------------------------------------------------------------------------------------------------------------------------------------------------------------------------------------------------------------------------------------------------------------------------------------------------------------------------------------------------------------------------------------------------------------------------------------------------------------------------------------------------------------------------------------------------------------------------------------------------------------------------------------------------------------------------------------------------------------------------------------------------------------------------------------------------------------------------------------------|
| Journal:                        | <i>BMJ Open</i>                                                                                                                                                                                                                                                                                                                                                                                                                                                                                                                                                                                                                                                                                                                                                                                                                                                                                                                                                                                                                                                                                                                                                                                                                                                                                                                                                                                                                                                                                                                                                                                       |
| Manuscript ID                   | bmjopen-2021-054536.R1                                                                                                                                                                                                                                                                                                                                                                                                                                                                                                                                                                                                                                                                                                                                                                                                                                                                                                                                                                                                                                                                                                                                                                                                                                                                                                                                                                                                                                                                                                                                                                                |
| Article Type:                   | Protocol                                                                                                                                                                                                                                                                                                                                                                                                                                                                                                                                                                                                                                                                                                                                                                                                                                                                                                                                                                                                                                                                                                                                                                                                                                                                                                                                                                                                                                                                                                                                                                                              |
| Date Submitted by the Author:   | 02-Jun-2022                                                                                                                                                                                                                                                                                                                                                                                                                                                                                                                                                                                                                                                                                                                                                                                                                                                                                                                                                                                                                                                                                                                                                                                                                                                                                                                                                                                                                                                                                                                                                                                           |
| Complete List of Authors:       | Dunn, Sarah; Newcastle University, Newcastle Clinical Trials Unit<br>Brocklebank, Victoria; Newcastle University, National Renal Complement Therapeutics Centre<br>Bryant, Andrew; Newcastle University, Population Health Sciences Institute<br>Carnell, Sonya; Newcastle University, Newcastle Clinical Trials Unit<br>Chadwick, Thomas; Newcastle University, Population Health Sciences Institute<br>Johnson, Sally; Newcastle Upon Tyne Hospitals NHS Foundation Trust, Great North Children's Hospital ; Newcastle University, National Renal Complement Therapeutics Centre<br>Kavanagh, David; Newcastle University, Translational and Clinical Research Institute ; Newcastle University, National Renal Complement Therapeutics Centre<br>Lecouturier, Jan; Newcastle University, Population Health Sciences Institute<br>Malina, Michal; Newcastle Upon Tyne Hospitals NHS Foundation Trust, Great North Children's Hospital; Newcastle University, National Renal Complement Therapeutics Centre<br>Moloney, Eoin; Optimax Access LTD, Health Economics<br>Oluboyede , Yemi; Newcastle University, Population Health Sciences Institute<br>Weetman, Christopher; Newcastle University, Newcastle Clinical Trials Unit<br>Wong, Edwin; Newcastle University, Translational and Clinical Research Institute ; Newcastle University, National Renal Complement Therapeutics Centre<br>Woodward, Len; aHUS alliance Global Action<br>Sheerin, Neil; Newcastle University, Translational and Clinical Research Institute ; Newcastle University, National Renal Complement Therapeutics Centre |
| <b>Primary Subject Heading</b>: | Renal medicine                                                                                                                                                                                                                                                                                                                                                                                                                                                                                                                                                                                                                                                                                                                                                                                                                                                                                                                                                                                                                                                                                                                                                                                                                                                                                                                                                                                                                                                                                                                                                                                        |
| Secondary Subject Heading:      | Qualitative research, Health economics                                                                                                                                                                                                                                                                                                                                                                                                                                                                                                                                                                                                                                                                                                                                                                                                                                                                                                                                                                                                                                                                                                                                                                                                                                                                                                                                                                                                                                                                                                                                                                |
| Keywords:                       | NEPHROLOGY, HEALTH ECONOMICS, QUALITATIVE RESEARCH                                                                                                                                                                                                                                                                                                                                                                                                                                                                                                                                                                                                                                                                                                                                                                                                                                                                                                                                                                                                                                                                                                                                                                                                                                                                                                                                                                                                                                                                                                                                                    |

1  
2  
3  
4  
5  
6  
7  
8  
9  
10  
11  
12  
13  
14  
15  
16  
17  
18  
19  
20  
21  
22  
23  
24  
25  
26  
27  
28  
29  
30  
31  
32  
33  
34  
35  
36  
37  
38  
39  
40  
41  
42  
43  
44  
45  
46  
47  
48  
49  
50  
51  
52  
53  
54  
55  
56  
57  
58  
59  
60

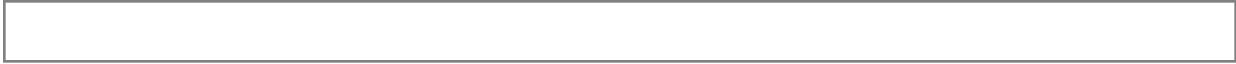

SCHOLARONE™  
Manuscripts

# Protocol for a multicentre, open label, prospective, single arm study of the safety and impact of eculizumab withdrawal in patients with atypical haemolytic uraemic syndrome

## Details of corresponding author

| Full name          | Postal address                                                                                                        | Email                                                            | ORCID ID            |
|--------------------|-----------------------------------------------------------------------------------------------------------------------|------------------------------------------------------------------|---------------------|
| Ms Sarah Dunn, MSc | Newcastle Clinical Trials Unit,<br>Newcastle University, 1-4 Claremont Terrace, Newcastle Upon Tyne, England, NE2 4AE | <a href="mailto:Sarah.dunn2@ncl.ac.uk">Sarah.dunn2@ncl.ac.uk</a> | 0000-0002-1901-3931 |

## Details of Co-authors

| Full name                                          | Department                                                                                                                       | Institution                                                                 | City                | Country | Email                                                                                          |
|----------------------------------------------------|----------------------------------------------------------------------------------------------------------------------------------|-----------------------------------------------------------------------------|---------------------|---------|------------------------------------------------------------------------------------------------|
| Dr Victoria Brocklebank, MBBS                      | National Renal Complement Therapeutics Centre                                                                                    | Newcastle University                                                        | Newcastle Upon Tyne | England | <a href="mailto:Victoria.Brocklebank@newcastle.ac.uk">Victoria.Brocklebank@newcastle.ac.uk</a> |
| Mr Andrew Bryant, MSc                              | Population Health Sciences                                                                                                       | Newcastle University                                                        | Newcastle Upon Tyne | England | <a href="mailto:andy.bryant@newcastle.ac.uk">andy.bryant@newcastle.ac.uk</a>                   |
| Dr Sonya Carnell PhD                               | Newcastle Clinical Trials Unit                                                                                                   | Newcastle University                                                        | Newcastle Upon Tyne | England | <a href="mailto:sonya_carnell@yahoo.com">sonya_carnell@yahoo.com</a>                           |
| Dr Thomas J Chadwick PhD                           | Population Health Sciences                                                                                                       | Newcastle University                                                        | Newcastle Upon Tyne | England | <a href="mailto:thomas.chadwick@newcastle.ac.uk">thomas.chadwick@newcastle.ac.uk</a>           |
| Dr Sally Johnson MB ChB MRCPCH, PhD                | Great North Children's Hospital, Translational and Clinical Research Institute and National Renal Complement Therapeutics Centre | Newcastle Upon Tyne Hospitals NHS Foundation Trust and Newcastle University | Newcastle Upon Tyne | England | <a href="mailto:sally.johnson15@nhs.net">sally.johnson15@nhs.net</a>                           |
| Professor David Kavanagh, MB, ChB, MRCP, PhD, FRCP | Translational and Clinical Research Institute and National Renal Complement Therapeutics Centre                                  | Newcastle University                                                        | Newcastle Upon Tyne | England | <a href="mailto:David.Kavanagh@newcastle.ac.uk">David.Kavanagh@newcastle.ac.uk</a>             |
| Ms Jan Lecouturier, MSc                            | Population Health Sciences                                                                                                       | Newcastle University                                                        | Newcastle Upon Tyne | England | <a href="mailto:jan.lecouturier@newcastle.ac.uk">jan.lecouturier@newcastle.ac.uk</a>           |

|                                                          |                                          |                                                                                                 |                                                                             |                     |         |                                                                                              |
|----------------------------------------------------------|------------------------------------------|-------------------------------------------------------------------------------------------------|-----------------------------------------------------------------------------|---------------------|---------|----------------------------------------------------------------------------------------------|
| 1<br>2<br>3<br>4<br>5<br>6<br>7<br>8<br>9                | Dr Michal Malina, MD, PhD, FRCPCH        | Great North Children's Hospital and National Renal Complement Therapeutics Centre               | Newcastle Upon Tyne Hospitals NHS Foundation Trust And Newcastle University | Newcastle Upon Tyne | England | <a href="mailto:michal.malina@nhs.net">michal.malina@nhs.net</a>                             |
| 10<br>11<br>12<br>13                                     | Mr Eoin Moloney, MSc                     | Health Economics                                                                                | Optimax Access LTD                                                          | Newcastle Upon Tyne | England | <a href="mailto:eoim.moloney@optimaxaccess.com">eoim.moloney@optimaxaccess.com</a>           |
| 14<br>15<br>16                                           | Dr Yemi Oluboyede PhD                    | Population Health Sciences                                                                      | Newcastle University                                                        | Newcastle Upon Tyne | England | <a href="mailto:yemi.oluboyede@newcastle.ac.uk">yemi.oluboyede@newcastle.ac.uk</a>           |
| 17<br>18<br>19<br>20                                     | Mr Christopher Weetman, BSc              | Newcastle Clinical Trials Unit                                                                  | Newcastle University                                                        | Newcastle Upon Tyne | England | <a href="mailto:christopher.weetman@newcastle.ac.uk">christopher.weetman@newcastle.ac.uk</a> |
| 21<br>22<br>23<br>24<br>25<br>26<br>27<br>28<br>29       | Dr Edwin Kwan Soon Wong, MBChB, PhD MRCP | Translational and Clinical Research Institute and National Renal Complement Therapeutics Centre | Newcastle University                                                        | Newcastle Upon Tyne | England | <a href="mailto:edwin.wong@newcastle.ac.uk">edwin.wong@newcastle.ac.uk</a>                   |
| 30<br>31<br>32<br>33                                     | Mr Len Woodward                          | N/A                                                                                             | aHUS alliance Global Action                                                 | Newcastle Upon Tyne | England | <a href="mailto:len.woodward@ntlworld.com">len.woodward@ntlworld.com</a>                     |
| 34<br>35<br>36<br>37<br>38<br>39<br>40<br>41<br>42<br>43 | Professor Neil Sheerin, MBBS, PhD, MRCP  | Translational and Clinical Research Institute and National Renal Complement Therapeutics Centre | Newcastle University                                                        | Newcastle Upon Tyne | England | <a href="mailto:Neil.Sheerin@newcastle.ac.uk">Neil.Sheerin@newcastle.ac.uk</a>               |

44  
45  
46  
47  
48  
49  
50  
51  
52  
53  
54  
55  
56  
57  
58  
59  
60

**Word Count: 4653**

## ABSTRACT

### Introduction

Atypical haemolytic uraemic syndrome (aHUS) is a rare, life threatening disease caused by excessive activation of part of the immune system called complement. Eculizumab is an effective treatment, controlling aHUS in 90% of patients. Due to the risk of relapse, lifelong treatment is currently recommended. Eculizumab treatment is not without problems, foremost being the risk of severe meningococcal infection, the burden of bi-weekly intravenous injections and the high cost.

This paper describes the design of the Stopping Eculizumab Treatment Safely in aHUS (SETS aHUS) trial that aims to establish whether a safety monitoring protocol, including the reintroduction of Eculizumab for those who relapse, could be a safe, alternative treatment strategy for patients with aHUS.

### Methods and analysis

This is a multi-centre, non-randomised, open label study of Eculizumab withdrawal with continuous monitoring of thrombotic microangiopathy (TMA) related serious adverse events using the Bayes factor single arm design. 30 patients will be recruited to withdraw from Eculizumab and have regular blood and urine tests for 24 months, to monitor for disease activity. If relapse occurs, treatment will be restarted within 24 hours of presentation. 20 patients will remain on treatment and complete health economic questionnaires only. An embedded qualitative study will explore the views of participants.

### Ethics and dissemination

A favourable ethical opinion and approval was obtained from the North East - Tyne & Wear South Research Ethics Committee. Outcomes will be disseminated via peer-reviewed articles and conference presentations.

### Trial registration

EudraCT Number: 2017-003916-37

ISRCTN number: ISRCTN17503205

Date of Registration: 20 April 2018

### Keywords

atypical Haemolytic Uraemic Syndrome, qualitative research, Complement, Eculizumab

### Article summary

Strengths and limitations of this study

- This is the first UK trial to evaluate the safety of eculizumab withdrawal in patient with aHUS.

- This trial fulfils the NICE recommendation that a research programme, with robust methods, should be carried out to evaluate when stopping Eculizumab treatment or dose adjustment might occur.
- Clinical experience suggests if relapse occurs this will likely happen in the first 12 months of withdrawal however, this trial follows patients up for 24 months to capture those patients who may relapse after the 12-month point.
- The small number of aHUS patients on treatment in the UK is insufficient to conduct a standard parallel group, randomised controlled trial.
- COVID-19 has had an impact on recruitment.

### **Trial Status**

This manuscript is based upon trial protocol version 7.0 dated 14<sup>th</sup> January 2021. The first patient was recruited in November 2018, recruitment ended on 31<sup>st</sup> January 2022 and planned last patient visit is November 2023.

## INTRODUCTION

Atypical Haemolytic Uraemic Syndrome (aHUS) is a severe, life-threatening disease characterised by thrombocytopenia, microangiopathic haemolytic anaemia and Acute Kidney Injury (AKI), and other organ involvement. Historically it is associated with a poor prognosis, with 50% of patients developing end stage kidney disease or dying in the first year after presentation [1] and a high risk of disease recurrence after kidney transplantation [2]. Prior to 2011, treatment options were limited and relied on plasma infusion or exchange, but in many cases this treatment failed to influence the course of disease [1] and was itself associated with significant morbidity and mortality [3]. In the UK, the incidence of aHUS is 0.4-0.5 cases per million per year [4].

The complement system is part of the innate immune system and in healthy individuals is tightly regulated to prevent excessive activation. In 60-70% of patients with aHUS, a genetic variant or autoantibody increasing complement activation can be identified [10]. In these patients, excessive activation of complement leads to endothelial injury and thrombus formation. The underlying genetic variant that predisposes to disease has an influence on the severity of disease and the likelihood of recurrent disease developing after transplantation [5].

Eculizumab is a humanized monoclonal antibody that inhibits the function of C5, an important protein involved in complement activation. Two uncontrolled, open label trials involving 36 adult and adolescent patients demonstrated the efficacy of Eculizumab treatment for aHUS over a 26 week period [6]. Additional prospective studies in children [7] and adults [8] confirmed efficacy. Follow-up of the original cohort suggests that treatment for 2 years is associated with good, longer-term clinical outcomes [9]. On the basis of the initial trial results, Eculizumab was approved for the treatment of aHUS by the European Medicines Agency (EMA) [10] and U.S. Food & Drug Administration (FDA) [11] in 2011. The National Institute for Health and Care Excellence (NICE) published its evaluation in 2015, recommending that Eculizumab should be used for the treatment of aHUS [12]. A recommendation in the NICE evaluation was that funding was on the condition that there was a 'research programme with robust methods to evaluate when stopping treatment or dose adjustment might occur'.

Complement is part of the immune system, therefore, treatment with Eculizumab is immunosuppressive, in particular, increasing the risk of *Neisseria meningitidis* infection (1-2000 fold)[13, 14]. All patients are vaccinated against meningococcal infection before starting Eculizumab and in the UK continuous prophylactic antibiotics are recommended. Despite these recommendations, there have been 6 cases of meningococcal infection in the UK in patients on Eculizumab treatment for aHUS. We are also aware of uncommon infections occurring in this group (enteroviral pneumonitis and *Herpes simplex* meningitis) but whether these are attributable to Eculizumab treatment is unclear.

Although there have been reports of patients relapsing after the withdrawal of treatment [15], there is increasing evidence that continuous treatment is not required for all patients. From experience prior to the introduction of Eculizumab, the risk of relapse is greatest in the period immediately after first presentation with 82% of relapses in adults, and 57% of relapses in children occurring within the first year after disease onset.



Beyond the first year, only a further 20% of patients will relapse in the subsequent 5-10 years [1]. Therefore, a proportion of patients will not relapse after their initial presentation and will be on Eculizumab unnecessarily. In addition, with monitoring for relapse and early reintroduction of treatment, complications from relapse can be avoided [16-18].

In this trial we will test the safety of eculizumab withdrawal using a Bayesian trial design. The efficacy of self-monitoring will also be tested, and we will explore patients' and parents/legal guardians' views on how treatment and monitoring of disease can be delivered most effectively.

## METHODS AND ANALYSIS

### Objectives and outcome measures

#### Primary

The primary clinical objective is to determine the safety of Eculizumab withdrawal in patients with aHUS, measured by the number of patients with a Thrombotic microangiopathy (TMA) related Serious Adverse Event (SAE) defined as any of the following:

- Irreversible (>3 months) reduction in estimated glomerular filtration rate (eGFR) -not attributable to another cause:

#### *In adults*

- by  $\geq 20\%$  if the screening eGFR is  $< 90\text{mls/min/1.73m}^2$ ,
- by  $> 20\%$  to a level  $< 90\text{mls/min/1.73m}^2$  if the screening eGFR is  $> 90\text{mls/min/1.73m}^2$ .

#### *In children*

- by  $\geq 20\%$  if the screening eGFR is  $< 75\text{mls/min/1.73m}^2$ ,
- by  $> 20\%$  to a level  $< 75\text{mls/min/1.73m}^2$  if the screening eGFR is  $> 75\text{mls/min/1.73m}^2$ .
- An episode of AKI attributed to a TMA that requires renal replacement therapy.
- A non-renal manifestation of a TMA that require hospitalisation, cause irreversible organ damage or death.

#### Secondary

##### *Clinical*

1. Measure the effectiveness of a monitoring protocol to detect disease relapse following withdrawal of Eculizumab as assessed by:

- The proportion of patients who relapse and restart Eculizumab without the development of a TMA-related SAE.
- The time from the first clinical feature (symptom, positive urinalysis or laboratory result) of a relapse of TMA and the re-introduction of Eculizumab.

- 1 2. The relapse rate after withdrawal of Eculizumab as determined by the proportion of patients who relapse  
2 after Eculizumab is withdrawn.
- 3 3. The proportion of patients, currently on long-term treatment with Eculizumab, who can be maintained off  
4 treatment.
- 5 4. The period from withdrawal to relapse in those patients who restart treatment.
- 6 5. The change in estimated GFR as calculated by the CKD-EPI or modified Schwartz equations over the course  
7 of the study from baseline (day 0) to end of the study.
- 8 6. Important clinical and laboratory indicators of imminent relapse by review of reported symptoms, physical  
9 signs, urinalysis and laboratory results prior to the diagnosis of a relapse.

### 17 *Health Economic*

- 18 7. The costs and health outcomes (measured in terms of adverse events and quality-adjusted life years [QALYs])  
19 for patients on standard care (not withdrawing from Eculizumab treatment) over the two-year trial duration:  
20
  - 21 • Healthcare Utilisation Questionnaires for non-withdrawal participants at Day 0, 14, 70,154, 252, 336, 504  
22 and 672.
  - 23 • Adverse Event Assessment at every visit from Day 7 (32 visits) for withdrawal participants.
- 24 8. QALYs estimated from responses to the EQ-5D-5L, and SF-36 and determinants of QALYs/utilities over the  
25 24-month follow-up period. at Day 0, 14, 70,154, 252, 336, 504 and 672.
- 26 9. Model-based estimate of the costs and health consequences, with results presented in terms of cost per  
27 QALY gained, over the estimated lifetime of patients withdrawing from treatment compared with standard  
28 care.

### 37 **Trial Design**

38 This is a multi-centre, non-randomised, open label study of Eculizumab withdrawal with continuous monitoring  
39 of TMA related serious adverse events using the Bayes factor single arm design of Johnson and Cook [19]. The  
40 patients will self-select whether they wish to withdraw from Eculizumab and carry out the monitoring protocol  
41 or remain on treatment and be part of the Health Economic analysis-only. An economic analysis, informed by  
42 the results of this trial, will determine whether Eculizumab withdrawal, substituting treatment with a  
43 protocolised surveillance and treatment reintroduction strategy, is cost-effective. The patient visit schedule for  
44 the withdrawal cohort is shown in Figure 1, and the Health Economic cohort in Figure 2.

### 53 **Trial setting**

54 This multi-centre trial will be carried out in up to 20 adult and paediatric Renal units (secondary and tertiary  
55 care) in the UK who are using Eculizumab to treat patients with aHUS.

### 59 **Eligibility**

60 All patients must fulfil the following inclusion criteria in order to be eligible for the trial:

- 1 • Age  $\geq 2+$  years of age,
- 2
- 3 • On Eculizumab treatment for at least 6 months,
- 4
- 5 • In remission with no evidence of ongoing microangiopathic haemolytic anaemia (MAHA) activity at
- 6 screening defined by:
- 7
  - 8 - Platelet count  $>$  lower limit of normal as determined by local reference range,
  - 9 - Lactate Dehydrogenase (LDH)  $< 2$  upper limit of normal as determined by local lab reference ranges,
- 10
- 11 • Normal renal function or Chronic Kidney Disease (CKD) stages 1-3 (eGFR  $> 30$ mls/min/1.73m<sup>2</sup>),
- 12
- 13 • Absence of decline of renal function confirmed by review of available assessments of renal function for the
- 14 preceding 6 months by the Chief Investigator (CI) and clinical members of the Trial Management Group
- 15 (TMG).
- 16
- 17
- 18
- 19

20 The following inclusion criteria must be met only by those wishing to participate in the withdrawal component

21 of the trial:

- 22
- 23 • Willing to attend for safety monitoring assessments,
- 24
- 25 • Willing to travel only to countries that can supply Eculizumab (to be confirmed with co-ordinating centre
- 26 prior to travel),
- 27
- 28 • Able to perform or parent/guardian to perform and record self-monitoring urinalysis,
- 29
- 30 • Sexually active female patients must have a negative pregnancy test at screening and be using an effective
- 31 contraception for the duration of the study.
- 32
- 33

34 OR

- 35 • fulfil one of the following criteria:
- 36
  - 37 - Be post-menopausal,
  - 38 - Have undergone surgical sterilisation.
- 39
- 40

41 The following exclusion criteria is applicable to all patients wishing to participate in the trial:

- 42
- 43
- 44 • Severe non-renal disease manifestations at initial presentation with aHUS, which in the opinion of the Chief
- 45 Investigator and/or the clinical members of the TMG makes the risk of treatment withdrawal unacceptable,
- 46
- 47 • Current or planned pregnancy within the study duration,
- 48
- 49 • Unable to give informed consent or assent, or unable to obtain parent/guardian consent if under 16 years
- 50 of age,
- 51
- 52 • Current participation in another clinical trial (not including participation in aHUS registries),
- 53
- 54 • Severe, uncontrolled hypertension (systolic blood pressure  $> 160$  mmHg) that is likely to induce at TMA.
- 55
- 56

57 The following exclusion criteria is applicable only to those wishing to participate in the withdrawal component

58 of the trial:

- 59 • Loss of a previous transplant kidney to recurrent aHUS,
- 60 • Transplant recipient with a pathogenic mutation in *C3*, *CFH* or *CFB*,

- Haematuria rating of 3+.

## Screening and Recruitment

30 patients will be recruited to withdraw from Eculizumab treatment, and 20 patients will be recruited who will remain on treatment and complete the Health Economic questionnaires only.

Patients with a diagnosis of aHUS receiving Eculizumab [4] to treat disease in native or transplanted kidneys will be identified by the National aHUS Service, which maintains a list of patients who fulfil these criteria as part of the NHS England commissioned service. Those patients who meet the genetic eligibility criteria will be highlighted to site teams who will carry out formal screening assessments. A physical examination and vital signs will be performed, and routine safety laboratory tests will be reviewed to ensure that a patient fulfils all eligibility criteria for entry into the study. Female participants withdrawing from treatment, who are of childbearing age and sexually active, will be required to have a negative pregnancy test prior to treatment withdrawal. Participants will also consent to have samples taken for exploratory analysis and storage at Newcastle University biobank for use in future research.

Consent will be sought from the parents/legal guardian on behalf of patients under the age of 16. Assent will be taken from those patients under 16 years old, as appropriate (supplement 1). No trial related procedures will be carried out prior to consent.

## Intervention

Patients who consent to withdraw from Eculizumab will receive their last dose of Eculizumab during visit 1 (classed as day -14 prior to withdrawal).

## Visit Details and Assessments

Baseline Assessments & Data collection for withdrawal cohort (Visit 2, Day 0 +/- 2 days)

Study day 0 will be the day that the participants would usually receive their next dose of Eculizumab, based on standard dosing schedules (+/-2 days). The Eculizumab will not be administered however, meningococcal prophylaxis will be continued for a further 2 weeks after day 0.

At day 0 of the study (Visit 2), participants will undergo the following assessments:

Vital signs (temperature, pulse and blood pressure), Height & weight, renal function (creatinine and eGFR), Urinalysis and urine protein/creatinine ratio, haemolysis markers including platelet count, haemoglobin, LDH, Electrolyte Profile, Liver Function (Bilirubin, ALT/AST, ALP, LDH, serum calcium, phosphate, albumin & total protein), haptoglobin (if available) and blood film, concomitant medication review, health-related quality of life questionnaires (EQ-5D-5L and SF-36) and health care utilisation questionnaire. A biomarker and complement activation sample to identify predictors of relapse (for example soluble C5b-9) is also taken and stored at site before transfer to Newcastle University.

## Study Visit Assessments & Data collection for withdrawal cohort (Visits 3-34)

Participants will be assessed regularly for evidence of disease relapse for the 2-year duration of the study. The participants will attend a total of 32 safety monitoring visits over the 2-year withdrawal follow-up period.

Trial participants will be reviewed at the trial site weekly (+/- 2 days) for the first month, then alternate weeks (+/-2 days) until month 6, then monthly (+/- 7 days) thereafter until the end of the trial period (month 24). At each study visit, the participants will undergo the monitoring assessments as detailed in Figure 1.

Paediatric participants must have their weight recorded at every visit for calculation of eGFR. At the end of the trial, the level of safety monitoring for those patients who remain off treatment and disease free will be decided by their local clinical care team in discussion with the National aHUS Service.

Due to the COVID-19 pandemic, participants may be unable to attend their scheduled follow up visits or may be attending a local hospital to have safety bloods taken. If the participants are unable to attend site due to self-isolation or underlying health issues; where possible, a remote, follow-up call will be carried out by a member of the local research team. Participants will be asked to report changes to their concomitant medications, any adverse events experienced since their previous follow-up and the results of their home urinalysis tests.

### Health Economic Assessments

Participants, or their parent/legal guardian, in both withdrawal and Health Economics cohorts will complete the EQ-5D-5L (proxy version if patient < 12 years), SF36 (parent/legal guardian completes if patient <14 years) and a health care utilisation questionnaire at 8 timepoints. A time and travel questionnaire is completed at 1 timepoint, as detailed in Figures 1 and 2.

### Self-monitored Urinalysis

Withdrawal participants, or their parent/legal guardian, will be trained to perform and understand the results of home urinalysis. Urinalysis, for the presence of haematuria or haemoglobinuria as an indicator of intravascular haemolysis and therefore disease activity, will then be performed daily by the participant or parent/legal guardian for the first month and then three times per week for the remainder of the study period. The results will be recorded in a participant diary and will be reviewed at each study visit. Participants or their parent/legal guardian will report any significant change in urinalysis, not related to menstruation, using their own baseline result to guide them in relation to the thresholds as detailed in *Table 1*.

*Table 1. Home Urinalysis result thresholds*

| Baseline  | urinalysis result threshold (not related to menstruation)     |
|-----------|---------------------------------------------------------------|
| Neg/Trace | ++ on any occasion OR + on any two occasions 24 hours apart   |
| +         | +++ on any occasion OR ++ on any two occasions 24 hours apart |
| ++        | +++ on any occasion                                           |

1  
2  
3 If the threshold criteria are met, participants or their parent/legal guardian will contact their treatment site  
4 immediately to arrange an unscheduled visit to assess disease activity as outlined in *Figure 1*.  
5  
6  
7

### 8 **Trial Withdrawal**

9 Participants will have the right to withdraw from the study at any time for any reason, and without giving a  
10 reason. The investigator will also have the right to withdraw participants from the study if she/he judges this to  
11 be in their best interest. Those participants who have been withdrawn from treatment can request to restart  
12 treatment, even if they have not relapsed. Data and blood samples provided by the participant up until the  
13 point of withdrawal will be included in analysis, unless they specifically request to have this removed.  
14 Participants who withdraw from the trial will not be replaced.  
15  
16  
17  
18  
19  
20

### 21 **Change in Health Status**

22 Participants will be advised to report any significant change in health status to the responsible site or local  
23 health care provider. Participants will be provided with a participant identification card to present to attending  
24 medical staff with details of the study, tests required and study centre and National aHUS Service contact details  
25 (Supplement 2). Sites will notify the participants' General Practitioner of their involvement in the study and  
26 inform them of the required action to be taken in the case of suspected relapse. Criteria for a diagnosis of aHUS  
27 relapse are shown in Figure 3.  
28  
29  
30  
31  
32  
33

34 If there is a clinical suspicion of disease activity, formal assessment will occur as outlined in *Figure 1*,  
35 Unscheduled visit column.  
36

37 Any other adverse events that could represent a relapse will be discussed with the Investigators and/or the  
38 aHUS National Service. A decision to restart will be made according to current Service procedures.  
39  
40  
41

### 42 **Relapse Management**

43 When a relapse is diagnosed, participants will restart Eculizumab treatment within 24 hours of presentation  
44 provided there is no evidence of an active infection that would be a contra-indication to treatment at the  
45 recommended dose of 900mg weekly for the first 4 weeks then 1200mg every two weeks thereafter (or age  
46 adjusted dose and regime). TMA activity will be monitored (platelet count, LDH) as recommended by attending  
47 clinician until haematological remission is achieved as defined in Figure 4.  
48  
49  
50  
51  
52  
53

54 Participants who relapse and require re-introduction of Eculizumab treatment will remain on treatment in study  
55 under follow up for the full 2 years of the study. Home urinalysis will not be required after re-introduction of  
56 Eculizumab treatment.  
57  
58

59 Participants will consent to travel to only those countries where Eculizumab is available. If a participant relapses  
60 while they are travelling outside of the country, the National aHUS Service will make arrangements with the

1 destination country to access and fund Eculizumab if required, with arrangements from the commissioning  
2 authority.  
3  
4  
5

### 6 **Embedded qualitative study**

7  
8 In-depth one-to-one telephone interviews will be conducted following a topic guide developed with the input  
9 of the research team, including PPI. The intention is to keep interviews very broad to ensure we capture the full  
10 experience of interviewees.  
11  
12

13  
14 Up to 30 patients who withdraw from Eculizumab and up to 20 patients who decline to withdraw will be  
15 approached to participate. Up to 20 patients who withdraw will be re-interviewed at the end of the withdrawal  
16 period (24 months later) to explore their views of the monitoring protocol. This group will be asked at the first  
17 interview if they agree to be contacted again towards the end of the study for a follow up interview. Where  
18 possible, any patients who relapse and go back onto treatment will also be interviewed. Consent will be  
19 recorded at the time of the interview. Interviews will be digitally recorded with the permission of the  
20 interviewee, transcribed verbatim and anonymised.  
21  
22  
23  
24  
25

### 26 **Safety reporting**

27  
28 All Adverse Events (AEs) occurring from the point of withdrawal (day 0) to end of study participation will be  
29 recorded. SAEs occurring from the point of withdrawal (day 0) must be reported to The Newcastle Clinical Trials  
30 Unit (NCTU) within 24 hours of the site becoming aware of the event. Serious Adverse Reactions (SARs) and  
31 Suspected Unexpected Serious Adverse Reactions (SUSARs) are reportable only for those participants who have  
32 Eculizumab treatment re-initiated during their participation in the trial. The assessment of expectedness will be  
33 performed by the PI at site against the approved Reference Safety Information (RSI) for the trial (Section 4.8 of  
34 the Soliris SmPC).  
35  
36  
37  
38  
39  
40  
41  
42

### 43 **Statistical Analysis**

#### 44 **Sample size**

45  
46 A maximum of 30 patients will be recruited to the withdrawal component; this is judged to be reasonable given  
47 the rare nature of the disease. The specifics of this sample size are intrinsically linked to the Bayes factor single  
48 arm binary design employed to analyse the primary outcome measure. There is no allowance for loss to follow-  
49 up as this patient group is already subject to a high degree of clinical follow-up and death is defined as one of  
50 the serious events under consideration. 20 patients will be recruited to the non-withdrawal arm as a  
51 comparator group for health economic analysis only.  
52  
53  
54  
55  
56

#### 57 **Analysis**

58  
59 This is a single arm, open label trial with the primary endpoint being a binary response (the presence/absence  
60 of a primary outcome event within the follow-up period). We will compare the rate of TMA-related serious



adverse events (primary outcomes) following the withdrawal of medication to that of treatment-related serious adverse events, expected under standard care.

The Bayes factor single arm binary model [19] will be used to monitor the trial. Based on historical data, the event rate (treatment-related serious adverse events in 100 patients over a 2 year period) for the standard of care is 0.06, and we expect that withdrawal of the treatment would give a rate of 0.12. This choice of rate has been informed in discussion with patients. Using this Bayesian hypothesis test-based design, we assume the rate is 0.06 under the null, and 0.12 under the alternative hypothesis.

We assume that the sample distribution of number of responses follows a binomial distribution and use an inverse moment prior for response under the alternative hypothesis.

### Stopping Rules

A minimum of 5 patients will be enrolled before applying the stopping rules, and the cohort size for monitoring is 5 patients. The Data Monitoring Committee (DMC) can request earlier review if adverse events are reported before this point.

We implement two stopping rules:

(1) We will stop the trial for superiority (there being fewer TMA related serious adverse events on the intervention than would be expected under standard of care) if the posterior probability of the alternative hypothesis is less than 0.05, i.e.  $\Pr(H_1 | \text{Data}) < 0.05$ ;

(2) We will stop the trial for inferiority if the posterior probability of the alternative hypothesis is greater than 0.80, i.e.,  $\Pr(H_1 | \text{Data}) > 0.80$ .

### Operating Characteristics and Stopping Boundaries

The operating characteristics (Table 2) and stopping boundaries (Table 3) were produced using the M. D. Anderson Cancer Center Department of Biostatistics software BayesFactorBinary, version 1.0 [20]

Table 2. Operating Characteristics

| Scenario | True rate of treatment related serious adverse events | Probability of Stopping for Inferiority | Probability of Stopping for Superiority | Average number of patients treated (Percentiles: 10%, 25%, 50%, 75%, 90%) |
|----------|-------------------------------------------------------|-----------------------------------------|-----------------------------------------|---------------------------------------------------------------------------|
| 1        | 0.06                                                  | 0.096                                   | 0                                       | 28.44 (30, 30, 30, 30, 30)                                                |
| 2        | 0.12                                                  | 0.443                                   | 0                                       | 23.48 (5, 15, 30, 30, 30)                                                 |
| 3        | 0.18                                                  | 0.753                                   | 0                                       | 17.76 (5, 10, 15, 30, 30)                                                 |
| 4        | 0.24                                                  | 0.928                                   | 0                                       | 13.72 (5, 5, 15, 15, 30)                                                  |
| 5        | 0.30                                                  | 0.982                                   | 0                                       | 10.52 (5, 5, 10, 15, 20)                                                  |

If the true rate is 0.06 (Scenario 1, null hypothesis), the trial will stop with probabilities of 0.096 and 0 in favour of the alternative and null hypotheses, respectively. The average number of patients (10%, 90% percentiles) is



28.44 (30, 30). If the true rate is 0.12 (Scenario 2, alternative hypothesis), the trial will stop with probabilities of 0.443 and 0 in favour of the alternative and null hypotheses, respectively. The average number of patients (10%, 90%) is 23.48 (5, 30).

Table 3 – SETS aHUS Trial Stopping Boundaries

| Number of patients (in complete cohorts of 5) | <b>Stop</b> the trial for Superiority if there are this many TMA Events (inclusive) | <b>Continue</b> the trial if there are this many TMA Events (inclusive) | <b>Stop</b> the trial for Inferiority if there are this many TMA Events (inclusive) |
|-----------------------------------------------|-------------------------------------------------------------------------------------|-------------------------------------------------------------------------|-------------------------------------------------------------------------------------|
| 5                                             | Never stop for superiority with this many patients                                  | 0-1                                                                     | 2-5                                                                                 |
| 10 or 15                                      | Never stop for superiority with this many patients                                  | 0-2                                                                     | 3-15                                                                                |
| 20                                            | Never stop for superiority with this many patients                                  | 0-3                                                                     | 4-20                                                                                |
| 25 or 30                                      | Never stop for superiority with this many patients                                  | 0-4 (The trial always stops at 30 patients, which is the maximum)       | 5-30                                                                                |

The study will stop for inferiority with 2 TMA related serious adverse events in the first cohort of 5 participants. Subsequently, the study would stop if 3 or more TMA related serious adverse events are observed in the first 15 participants, 4 or more in the first 20 participants, and 5 or more in the whole study population. We are well placed to respond to any negative safety signal.

1000 repetitions were used in the software simulation. Calculations with different numbers of repetitions resulted in unchanged stopping boundaries with only marginal changes to the operating characteristics.

There may be differing risk of relapse according to disease aetiology. However, the available numbers do not allow for risk strata to be monitored separately. The DMC will consider this within their remit.

In addition to this ongoing analysis, at the end of the study, data will also be reported descriptively, together with the number of patients recruited. Descriptive statistics reported will be selected as appropriate to the specific outcome measure. For proportion outcomes, the number of patients recording the event will also be reported.

Due to the sample size, no comparative statistical methods will be applied. There will be no imputation of missing data and a complete case analysis will be undertaken.

### Subgroup Analyses

Except for the analysis of the primary outcome on an ongoing basis, the analyses described above may be reported separately for different genetic groups or risk strata.

### Health Economic analysis

Within-trial assessments of costs and outcomes

1 Costs and health outcomes (measured in terms of resource use of primary and secondary health care NHS  
2 services and QALYs) associated with Eculizumab withdrawal (30 participants), compared with standard care (20  
3 participants), will be assessed over the 24-month follow-up period. Information on costs and health outcomes  
4 will be recorded for each individual involved in both treatment groups. Data derived from the within-trial analysis  
5 will be assessed to understand the key determinants of differences in costs and outcomes between the two patient  
6 groups. Data will then be used to parameterise the lifetime economic model (combined with data from the  
7 literature).

### 14 Assessment of cost-effectiveness

15 An economic decision model will be developed to assess the cost-effectiveness of the alternative treatment  
16 options under evaluation. Costs and health consequences, measured in terms of QALYs, associated with  
17 Eculizumab withdrawal, and a policy of monitoring following withdrawal, and standard care, beyond the two-  
18 year timeframe of the trial will be captured. We propose to conduct a cost-utility analysis, with results presented  
19 in terms of incremental cost per QALY gained.  
20  
21  
22  
23

### 26 Qualitative analysis

27 We will take an inductive approach to data collection and analysis. This means there is no a priori theory;  
28 themes, concepts and theories will be elicited from the interview data when it is analysed and drawing upon  
29 relevant literature, PPI, and experts in the study team. Data will be analysed thematically using a constant  
30 comparative method. This entails a process of familiarisation with the data and then the development of a  
31 thematic framework. A small number of transcripts will be coded, and the framework amended accordingly. A  
32 second level analysis will be conducted using a constant comparative method. This involves a process of  
33 comparing and contrasting themes elicited from the data, within and across interviews [21]. NVivo will be used  
34 as a data management tool.  
35  
36  
37  
38  
39  
40  
41  
42

### 43 Trial Management and monitoring

44 This trial is sponsored by the Newcastle Upon Tyne Hospitals NHS Foundation Trust. The trial will be co-  
45 ordinated by a TMG that will include those individuals responsible for the day-to-day management of the trial.  
46 A Trial Steering Committee (TSC) made up of independent clinical and lay members will provide overall  
47 supervision of the trial. A Data Monitoring Committee (DMC) composed of independent clinicians and  
48 statistician will undertake independent review and monitor efficacy and safety endpoints. The trial was  
49 prospectively registered on the International Standard Registered Clinical/social sTudy Number (ISRCTN)  
50 registry and the European Union Drug Regulating Authorities Clinical Trials Database (EudraCT) (supplement 3).  
51 The Newcastle Clinical Trials Unit (NCTU) will be responsible for communicating protocol amendments to  
52 participating sites and carrying out central, remote, and on-site monitoring.  
53  
54  
55  
56  
57  
58  
59  
60

### Confidentiality and data handling

1 Personal data will be regarded as strictly confidential. To preserve anonymity, a unique participant ID will be  
2 assigned to each participant at consent. Only the clinical team at the participating sites will have access to key  
3 data which links study identifiers to individual datasets. All study records and Investigator Site Files will be kept  
4 at site in a locked filing cabinet with restricted access.  
5  
6  
7

8 Written consent will be sought from participants or legal guardians, if patient is under the age of 16 years, to  
9 allow access to their hospital records.  
10

11 Data is recorded by authorised staff and stored in a secure web-based electronic data capture system (MACRO)  
12 designed and maintained by NCTU hosted on secure servers at Rackspace within the UK. Analysis of the data  
13 will be undertaken by the Newcastle University trial statisticians. Anonymised data from this trial may be  
14 available to the scientific community subject to regulatory and ethics approval. Requests for data should be  
15 directed to the corresponding author. All study data will be archived for 5 years.  
16  
17  
18  
19  
20

### 21 **Patient and public involvement (PPI)**

22 A PPI representative sits on the Trial Management Group, was involved in protocol and study document  
23 development, and is involved in ongoing trial management discussions. We also have an aHUS patient as an  
24 independent member of the Trial Steering Committee.  
25  
26  
27  
28  
29

### 30 **ETHICS AND DISSEMINATION**

31 A favourable ethical opinion and approval was obtained from the North East - Tyne & Wear South Research  
32 Ethics Committee in April 2018. Written informed consent will be obtained from all participants prior to their  
33 involvement in the trial. The results of the study will be submitted to peer-reviewed journals, presented at  
34 conferences and on the trial website.  
35  
36  
37  
38  
39

### 40 **DISCUSSION**

41 This study will determine whether it is safe to withdraw Eculizumab using a trial methodology designed to  
42 detect an excess of adverse outcomes following withdrawal (primary endpoint). The study will also estimate  
43 the proportion of patients with aHUS that can be maintained off Eculizumab and test a system for surveillance  
44 to identify relapse early (secondary endpoints). This will allow a cost-utility analysis to be conducted, exploring  
45 the impact of treatment withdrawal [22]. This carefully monitored patient group will allow us to determine how  
46 early sub-clinical relapse can be detected using standard biochemical and haematological measurements and  
47 novel biomarkers of complement activation or tissue injury. An embedded qualitative study of patients, both  
48 those who withdraw and decide not to withdraw, will explore attitudes towards treatment and its withdrawal.  
49  
50  
51  
52  
53  
54  
55  
56  
57  
58  
59  
60

1  
2  
3 **REFERENCES**  
4

- 5 1. Fremeaux-Bacchi V, Fakhouri F, Garnier A, et al. Genetics and outcome of atypical hemolytic uremic  
6 syndrome: a nationwide French series comparing children and adults. *Clin J Am Soc Nephrol* 2013,  
7 8(4):554-562.  
8  
9  
10 2. Noris M, Remuzzi G. Thrombotic microangiopathy after kidney transplantation. *Am J Transplant*  
11 2010;10(7):1517-1523.  
12  
13 3. Johnson S, Stojanovic J, Ariceta G, et al. An audit analysis of a guideline for the investigation and initial  
14 therapy of diarrhea negative (atypical) hemolytic uremic syndrome. *Pediatric nephrology (Berlin,*  
15 *Germany)* 2014;29(10):1967-1978.  
16  
17 4. Sheerin NS, Kavanagh D, Goodship TH, et al. A national specialized service in England for atypical  
18 haemolytic uraemic syndrome-the first year's experience. *QJM* 2016;109(1):27-33.  
19  
20 5. Le Quintrec M, Zuber J, Moulin B, et al. Complement genes strongly predict recurrence and graft  
21 outcome in adult renal transplant recipients with atypical hemolytic and uremic syndrome. *Am J*  
22 *Transplant* 2013;13(3):663-675.  
23  
24 6. Legendre CM, Licht C, Muus P, et al. Terminal complement inhibitor eculizumab in atypical hemolytic-  
25 uremic syndrome. *The New England journal of medicine* 2013;368(23):2169-2181.  
26  
27 7. Greenbaum LA, Fila M, Ardissino G, et al. Eculizumab is a safe and effective treatment in pediatric  
28 patients with atypical hemolytic uremic syndrome. *Kidney international* 2016;89(3):701-711.  
29  
30 8. Fakhouri F, Hourmant M, Campistol JM, et al. Terminal Complement Inhibitor Eculizumab in Adult  
31 Patients With Atypical Hemolytic Uremic Syndrome: A Single-Arm, Open-Label Trial. *Am J Kidney Dis*  
32 2016; 68(1):84-93.  
33  
34 9. Licht C, Greenbaum LA, Muus P, et al. Efficacy and safety of eculizumab in atypical hemolytic uremic  
35 syndrome from 2-year extensions of phase 2 studies. *Kidney international* 2015; 87(5):1061-1073.  
36  
37 10. European Medicines Agency: [http://www.ema.europa.eu/docs/en\\_GB/document\\_library/EPAR\\_-](http://www.ema.europa.eu/docs/en_GB/document_library/EPAR_-_Assessment_Report_-_Variation/human/000791/WC500119185.pdf)  
38 [Assessment\\_Report\\_-\\_Variation/human/000791/WC500119185.pdf](http://www.ema.europa.eu/docs/en_GB/document_library/EPAR_-_Assessment_Report_-_Variation/human/000791/WC500119185.pdf). 2011.  
39  
40 11. FDA:  
41 [http://www.fda.gov/AboutFDA/CentersOffices/OfficeofMedicalProductsandTobacco/CDER/ucm2730](http://www.fda.gov/AboutFDA/CentersOffices/OfficeofMedicalProductsandTobacco/CDER/ucm273089.htm)  
42 [89.htm](http://www.fda.gov/AboutFDA/CentersOffices/OfficeofMedicalProductsandTobacco/CDER/ucm273089.htm).  
43  
44 12. [https://www.nice.org.uk/guidance/hst1/resources/eculizumab-for-treating-atypical-haemolytic-](https://www.nice.org.uk/guidance/hst1/resources/eculizumab-for-treating-atypical-haemolytic-uraemic-syndrome-1394895848389)  
45 [uraemic-syndrome-1394895848389](https://www.nice.org.uk/guidance/hst1/resources/eculizumab-for-treating-atypical-haemolytic-uraemic-syndrome-1394895848389)  
46  
47 13. Struijk GH, Bouts AH, Rijkers GT, et al. Meningococcal sepsis complicating eculizumab treatment  
48 despite prior vaccination. *Am J Transplant* 2013;13(3):819-820.  
49  
50 14. McNamara LA, Topaz N, Wang X, et al. High Risk for Invasive Meningococcal Disease Among Patients  
51 Receiving Eculizumab (Soliris) Despite Receipt of Meningococcal Vaccine. *MMWR Morb Mortal Wkly*  
52 *Rep* 2017;66(27):734-737.  
53  
54  
55  
56  
57  
58  
59  
60

- 1  
2  
3  
4  
5  
6  
7  
8  
9  
10  
11  
12  
13  
14  
15  
16  
17  
18  
19  
20  
21  
22  
23  
24  
25  
26  
27  
28  
29  
30  
31  
32  
33  
34  
35  
36  
37  
38  
39  
40  
41  
42  
43  
44  
45  
46  
47  
48  
49  
50  
51  
52  
53  
54  
55  
56  
57  
58  
59  
60
15. Carr R, Cataland SR. Relapse of aHUS after discontinuation of therapy with eculizumab in a patient with aHUS and factor H mutation. *Annals of hematology* 2013;92(6):845-846.
  16. Ardissino G, Testa S, Possenti I, et al. Discontinuation of eculizumab maintenance treatment for atypical hemolytic uremic syndrome: a report of 10 cases. *Am J Kidney Dis* 2014;64(4):633-637.
  17. Wijnsma KL, Duineveld C, Volokhina EB, et al. Safety and effectiveness of restrictive eculizumab treatment in atypical haemolytic uremic syndrome. *Nephrol Dial Transplant* 2018;33(4):635-645.
  18. Fakhouri F, Fila M, Hummel A, et al. Eculizumab discontinuation in children and adults with atypical haemolytic uremic syndrome: a prospective multicentric study. *Blood* 2020.
  19. Johnson VE, Cook JD: Bayesian design of single-arm phase II clinical trials with continuous monitoring. *Clin Trials* 2009; 6(3):217-226.
  20. [https://biostatistics.mdanderson.org/SoftwareDownload/SoftwareFiles/BayesFactorBinary/UsersGuide\\_BayesFactorBinary.pdf](https://biostatistics.mdanderson.org/SoftwareDownload/SoftwareFiles/BayesFactorBinary/UsersGuide_BayesFactorBinary.pdf)
  21. Glaser BG. The Constant Comparative Method of Qualitative Analysis. *Social Problems* 1965;12(4):436-45.
  22. Drummond MF, O'Brien B, Stoddart GL, et al. Basic Types of Economic Evaluation. In: *Methods for economic evaluation of health care programmes*. edn. Oxford University Press; 2005.

## Acknowledgements

The authors would like to thank Dr Colin Muirhead who was responsible for the statistical proposal in the initial grant application.

The authors would also like to thank all the Principal Investigators for their contribution and support, the research nurses, the members of the TSC and DMC and all the patients involved in the SETS aHUS Trial.

## Contributors

Professor Neil Sheerin is the Chief Investigator and senior author of the SETS aHUS design and has led on grant acquisition and protocol development. Professor David Kavanagh, Dr Sally Johnson, Dr Ewin Kwan Soon Wong, Mr Len Woodward, Ms Jan Lecouturier, Dr Thomas Chadwick, and Dr Yemi Oluboyede are co-applicants of the grant and contributed to the design of the trial and protocol development. Dr Sonya Carnell and Ms Sarah Dunn are part of the trial management team and contributed to protocol development. Mr Eoin Moloney is a Health Economist and contributed to protocol development. Mr Andy Bryant is a research statistician and contributed to protocol development. Mr Christopher Weetman is a data manager and contributed to protocol development. Dr Michal Malina and Dr Victoria Brocklebank are part of the National Renal Complement Therapeutics Centre and have played key roles in the running of the SETS aHUS trial.

This paper was drafted from the current approved version of the protocol by the corresponding author SD; all contributing authors commented and amended drafts of the paper. All contributing authors read and approved the final manuscript.

## Funding

The SETS aHUS Trial is funded by the National Institute for Health Research (NIHR) Health Technology Assessment (HTA) Programme (project number 15/130/94). The views expressed are those of the authors and not necessarily those of the NIHR or the Department of Health and Social Care.

## Conflict of interests

SB has received honoraria for sitting on advisory boards for Alexion and Novartis. DK is a director of and scientific advisor to Gyroscope Therapeutics. DK received advisory board payments from Idorsia, Novartis, ChemoCentryx, Alexion, Apellis, Biomarin and Sarepta. DK's spouse works for GSK. MM has received honoraria for educational talks and honorarium for national lead of aHUS registry, both from Alexion and travel expenses from Alexion. EKSJ has received honoraria for lectures and/or advisory boards for Alexion Pharmaceutical, Biocryst and Novartis. LW has received expenses, honoraria and fees for advisory board participation and talks from Alexion and Roche. NS has given lectures or sat on advisory boards for Alexion Pharmaceutical, Roche, Astra Zeneca and Novartis, no personal honoraria, all payments made to the department.

## Patient and public involvement

1 Patients and/or the public were involved in the design, or conduct, or reporting, or dissemination plans of this  
2 research. Refer to the Methods section for further details.  
3  
4  
5

### 6 **Patient consent for publication**

7  
8 Not required.  
9

### 10 11 **Provenance and peer review**

12 Not commissioned; externally peer reviewed during funding application process.  
13  
14  
15

### 16 17 **Figure Legends**

18  
19 Figure 1. Data Collection Time Points for Withdrawal cohort  
20

21 Figure 2. Data Collection Time Points for Health Economics Cohort  
22

23 Figure 3. Criteria for diagnosis of aHUS relapse  
24

25  
26 Figure 4. Haematological remission definition and maintenance  
27  
28  
29  
30  
31  
32  
33  
34  
35  
36  
37  
38  
39  
40  
41  
42  
43  
44  
45  
46  
47  
48  
49  
50  
51  
52  
53  
54  
55  
56  
57  
58  
59  
60

|                                             | Central Pre-Screen | Site Screen and Consent | Final Infusion | Withdrawal Phase |   |   |   |   |   |   |   |    |    |    |    |    |    |    |    |    |    |    |    |    |    |    |    |    |    |    |    |    |    |    | Unscheduled Visit |    |    |    |    |   |
|---------------------------------------------|--------------------|-------------------------|----------------|------------------|---|---|---|---|---|---|---|----|----|----|----|----|----|----|----|----|----|----|----|----|----|----|----|----|----|----|----|----|----|----|-------------------|----|----|----|----|---|
| Month                                       | 0                  | 0                       | 0              | 1                |   |   | 2 |   |   | 3 |   |    | 4  |    |    | 5  |    |    | 6  |    |    | 7  | 8  | 9  | 10 | 11 | 12 | 13 | 14 | 15 | 16 | 17 | 18 | 19 | 20                | 21 | 22 | 23 | 24 |   |
| Visit Number                                | N/A                | N/A                     | 1              | 2                | 3 | 4 | 5 | 6 | 7 | 8 | 9 | 10 | 11 | 12 | 13 | 14 | 15 | 16 | 17 | 18 | 19 | 20 | 21 | 22 | 23 | 24 | 25 | 26 | 27 | 28 | 29 | 30 | 31 | 32 | 33                | 34 |    |    |    |   |
| Genetic Eligibility                         | X                  |                         |                |                  |   |   |   |   |   |   |   |    |    |    |    |    |    |    |    |    |    |    |    |    |    |    |    |    |    |    |    |    |    |    |                   |    |    |    |    |   |
| Medical History Review                      |                    | X                       |                |                  |   |   |   |   |   |   |   |    |    |    |    |    |    |    |    |    |    |    |    |    |    |    |    |    |    |    |    |    |    |    |                   |    |    |    |    |   |
| Informed consent                            |                    | X                       |                |                  |   |   |   |   |   |   |   |    |    |    |    |    |    |    |    |    |    |    |    |    |    |    |    |    |    |    |    |    |    |    |                   |    |    |    |    |   |
| Eligibility Checklist Completion            |                    | X                       |                |                  |   |   |   |   |   |   |   |    |    |    |    |    |    |    |    |    |    |    |    |    |    |    |    |    |    |    |    |    |    |    |                   |    |    |    |    |   |
| Physical Examination                        |                    | X                       |                |                  |   |   |   |   |   |   |   |    |    |    |    |    |    |    |    |    |    |    |    |    |    |    |    |    |    |    |    |    |    |    |                   |    | X  | X  |    |   |
| Height & Weight                             |                    | X                       |                |                  |   |   |   |   |   |   |   |    |    |    |    |    |    |    |    |    |    |    |    |    |    |    |    |    |    |    |    |    |    |    |                   |    |    |    |    |   |
| Pregnancy test                              |                    | X                       |                |                  |   |   |   |   |   |   |   |    |    |    |    |    |    |    |    |    |    |    |    |    |    |    |    |    |    |    |    |    |    |    |                   |    |    |    |    |   |
| Eculizumab Infusion                         |                    |                         | X              |                  |   |   |   |   |   |   |   |    |    |    |    |    |    |    |    |    |    |    |    |    |    |    |    |    |    |    |    |    |    |    |                   |    |    |    |    |   |
| meningococcal prophylaxis                   |                    |                         | X              | X                |   |   |   |   |   |   |   |    |    |    |    |    |    |    |    |    |    |    |    |    |    |    |    |    |    |    |    |    |    |    |                   |    |    |    |    |   |
| urine analysis training                     |                    |                         |                | X                |   |   |   |   |   |   |   |    |    |    |    |    |    |    |    |    |    |    |    |    |    |    |    |    |    |    |    |    |    |    |                   |    |    |    |    |   |
| Vital Signs                                 |                    | X                       |                | X                | X | X | X | X | X | X | X | X  | X  | X  | X  | X  | X  | X  | X  | X  | X  | X  | X  | X  | X  | X  | X  | X  | X  | X  | X  | X  | X  | X  | X                 | X  | X  | X  | X  |   |
| Concomitant medication Review               |                    | X                       |                | X                | X | X | X | X | X | X | X | X  | X  | X  | X  | X  | X  | X  | X  | X  | X  | X  | X  | X  | X  | X  | X  | X  | X  | X  | X  | X  | X  | X  | X                 | X  | X  | X  | X  |   |
| Renal Function (Creatinine & GFR)           |                    | X                       |                | X                | X | X | X | X | X | X | X | X  | X  | X  | X  | X  | X  | X  | X  | X  | X  | X  | X  | X  | X  | X  | X  | X  | X  | X  | X  | X  | X  | X  | X                 | X  | X  | X  | X  |   |
| Liver Function Tests                        |                    | X                       |                | X                | X | X | X | X | X | X | X | X  | X  | X  | X  | X  | X  | X  | X  | X  | X  | X  | X  | X  | X  | X  | X  | X  | X  | X  | X  | X  | X  | X  | X                 | X  | X  | X  | X  | X |
| Haemolysis markers (full blood count & LDH) |                    | X                       |                | X                | X | X | X | X | X | X | X | X  | X  | X  | X  | X  | X  | X  | X  | X  | X  | X  | X  | X  | X  | X  | X  | X  | X  | X  | X  | X  | X  | X  | X                 | X  | X  | X  | X  |   |
| Electrolyte profile (U&Es)                  |                    | X                       |                | X                | X | X | X | X | X | X | X | X  | X  | X  | X  | X  | X  | X  | X  | X  | X  | X  | X  | X  | X  | X  | X  | X  | X  | X  | X  | X  | X  | X  | X                 | X  | X  | X  | X  |   |
| Haptoglobin & Blood film                    |                    | X                       |                | X                |   |   | X |   |   |   | X |    |    |    |    |    | X  |    |    |    |    |    |    |    |    |    |    |    |    |    |    |    |    |    |                   | X  | X  |    |    |   |
| Urine PCR                                   |                    | X                       |                | X                |   |   | X |   |   |   | X |    |    |    |    |    | X  |    |    |    |    |    |    |    |    |    |    |    |    |    |    |    |    |    |                   | X  | X  |    |    |   |
| Biomarkers and complement                   |                    | X                       |                | X                | X | X | X | X | X | X | X | X  | X  | X  | X  | X  | X  | X  | X  | X  | X  | X  | X  | X  | X  | X  | X  | X  | X  | X  | X  | X  | X  | X  | X                 | X  | X  | X  | X  |   |





1  
2  
3  
4  
5  
6  
7  
8  
9  
10  
11  
12  
13  
14  
15  
16  
17  
18  
19  
20  
21  
22  
23  
24  
25  
26  
27  
28  
29  
30  
31  
32  
33  
34  
35  
36  
37  
38  
39  
40  
41  
42  
43  
44  
45  
46

For peer review only

| Follow - up                           |   |   |   |   |   |   |    |   |
|---------------------------------------|---|---|---|---|---|---|----|---|
| month                                 | 1 |   | 3 |   | 6 |   | 24 |   |
| visit number                          | 1 | 2 | 3 | 4 | 5 | 6 | 7  | 8 |
| Medical History Review                | X |   |   |   |   |   |    |   |
| Informed consent                      | X |   |   |   |   |   |    |   |
| Eligibility Checklist                 | X |   |   |   |   |   |    |   |
| EQ5D & SF36                           | X | X | X | X | X | X | X  | X |
| Health care Utilisation questionnaire | X | X | X | X | X | X | X  | X |
| Time & Travel Questionnaire           |   |   |   |   |   |   | X  |   |

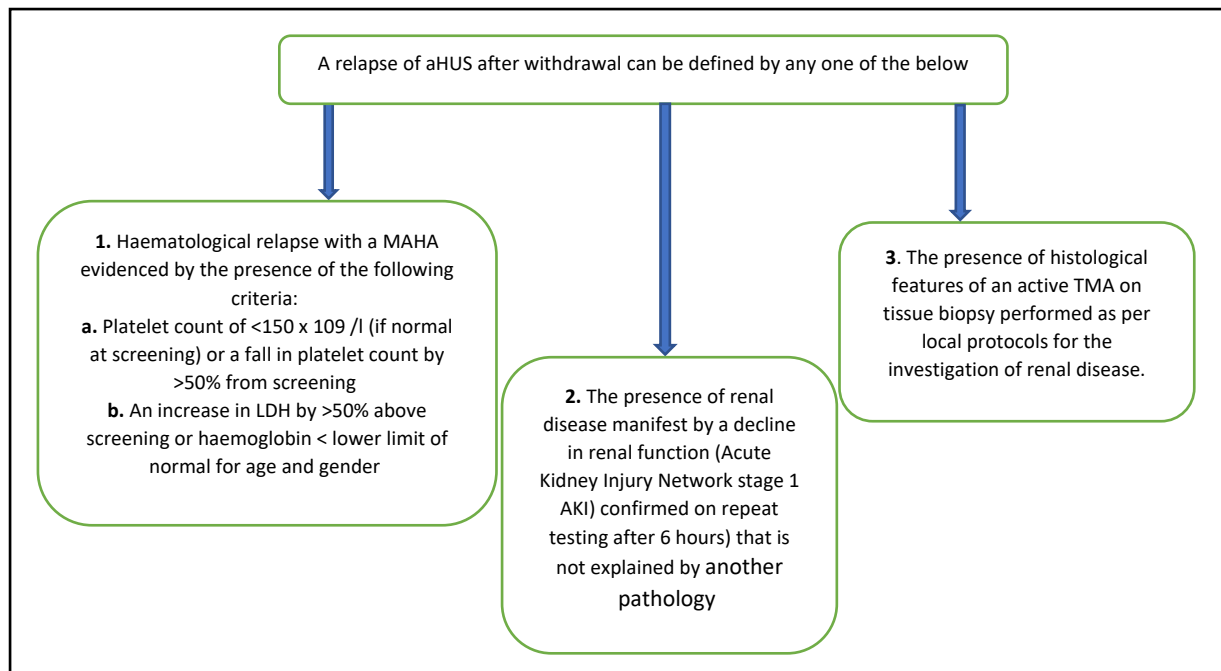

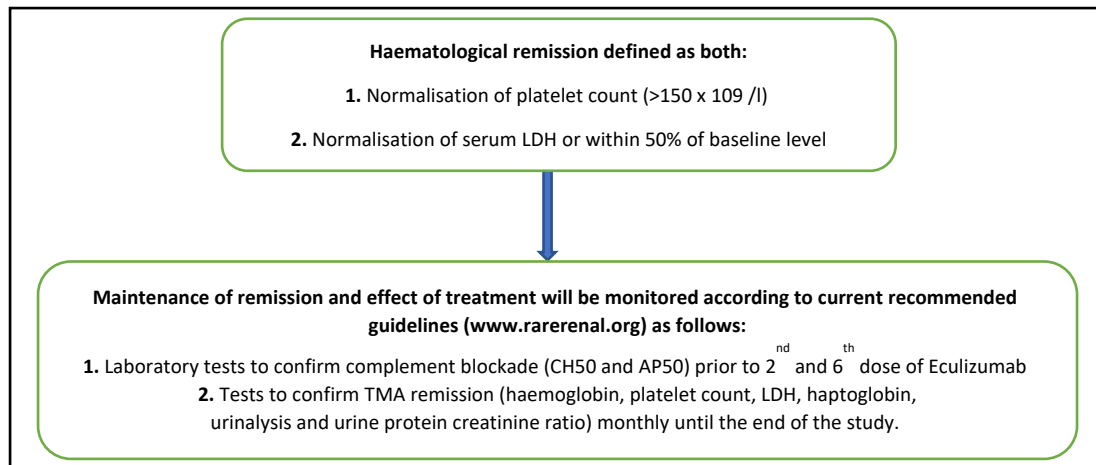

**SETS aHUS: Stopping Eculizumab Treatment Safely in aHUS**  
**Participant Information Sheet (aged 16+)**  
**Version 3.0, 08.02.19**

**Invitation**

You are being invited to take part in a research study. Please read the following information to help you decide if you want to take part. We would like you to understand why we are doing this research and what it means for you. You do not need to make a decision straight away, so please feel free to talk to others about the study if you wish. Please ask us if there is anything that is not clear or if you want to know more.

Please remember that you do not have to take part and your normal healthcare will not be affected in any way, whatever you decide.

**Part 1**

**What is the purpose of this study?**

***Atypical Haemolytic Uraemic Syndrome*** (aHUS) is a rare disease. When aHUS occurs the cells that line the blood vessels are damaged and are no longer able to stop blood from clotting. Blood clots form in small vessels, particularly in the kidney, leading to problems with kidney function. Most cases are due to abnormalities in a part of the immune system called the complement system. These abnormalities lead to excessive activation of the complement system, which is responsible for the cell damage and blood clots.

***Current standard treatment*** for aHUS involves a long-term intravenous injection of a drug called Eculizumab every 2 weeks. Eculizumab blocks the body's complement system and its ability to damage its own vulnerable cells.

Research has shown that Eculizumab is effective in the treatment of aHUS, but the recommendation that Eculizumab treatment should be lifelong is not based on strong evidence and may not be necessary for many patients.

This study hopes to provide evidence for an alternative strategy for treatment of aHUS based on monitoring and treatment re-introduction rather than continuous Eculizumab treatment.

***Overall aim: To establish an alternative and safe treatment strategy for patients with aHUS that includes withdrawal of Eculizumab treatment.***

**Thank you for reading so far – if you are still interested, please read the rest of this leaflet which gives more detailed information about the trial and what will happen if you decide to take part.**

## **Why have I been chosen to take part?**

You have been asked to take part in the study because you have Atypical Haemolytic Uraemic Syndrome and are currently receiving Eculizumab treatment. We are hoping to recruit 30 patients to the withdrawal study and an additional 20 patients who will remain on Eculizumab and complete a series of questionnaires only.

## **What would taking part involve?**

Taking part would involve stopping your Eculizumab treatment and attending 34 safety monitoring visits at hospital over the course of 24 months during which we will assess that you are safe to continue to remain off medication. If you currently receive your treatment at home you would need to be willing to attend the hospital to complete the safety visits. You will be required to test your urine at home and document the results daily (for the first month), and then three times per week for the remaining 23 months, in a patient diary provided to you by the study team. You will also complete questionnaires on 8 occasions relating to quality of life and measure use of NHS resources and your own out of pocket expenses related to health care.

If you do not want to stop your Eculizumab treatment but still want to participate you can also complete study questionnaires that relate to your quality of life, and measure use of NHS resources and your own out of pocket expenses related to health care. You would only be asked to complete these on 8 occasions over the 24-month period.

There is also a linked interview study that you can take part in whether you decide to withdraw from treatment or continue with Eculizumab treatment. If you would like to receive information about this study you can consent to have your contact details passed to the research team for them to contact you about this.

## **What are the possible benefits of taking part?**

It might mean that you will no longer need to take the Eculizumab treatment and face any potential risks or side effects associated with treatment. Patients are about a thousand times more likely to develop a serious, potentially life threatening infection with meningococcus, a bug that causes meningitis or sepsis. Vaccination, and even antibiotics, do not give complete protection from this. Other serious problems have also been reported in patients taking Eculizumab but we cannot be certain that Eculizumab was the cause of these problems.

Being in the study will mean that you will no longer need bi-weekly infusions and will not have to continue taking additional antibiotics to prevent infection. However, it is possible that you could need to restart and continue to receive Eculizumab treatment if a relapse was to occur.

[Trust Headed Paper]

## What are the possible risks of taking part?

The withdrawal of Eculizumab treatment could lead to a relapse of atypical HUS and relapse associated complications. When a relapse is diagnosed, your Eculizumab treatment will be restarted within 24 hours of presentation. It is essential that you present to a hospital with your patient card as soon as you begin to feel unwell or the home urine test shows an increase in the level of blood. This is to ensure that the Eculizumab is re-started as soon as possible to reduce the likelihood of kidney damage and associated complications. If your treatment is re-started, you will receive your first infusion in the hospital. You will also have the antibiotics restarted to protect you from infection. If you need to be put back on to Eculizumab treatment you can decide to receive your infusions in hospital or at home. This can be arranged with your clinical team if you relapse while in the study.

If a relapse occurs this could lead to:

- A drop in kidney function
- Other problems related to the disease which can affect organs such as the pancreas or nervous system

The evidence that is available at the moment suggests that if Eculizumab is reintroduced quickly these problems can be avoided. This is not proven, and this study will test whether this is true.

If, during the trial, you decide to travel outside of the country, we ask that you only travel to countries where Eculizumab is available, so treatment can be re-started immediately as required. You **MUST** first inform your hospital to check whether Eculizumab is available in the country that you plan to travel to and inform them of the dates that you will be outside of the country. While the cost of the Eculizumab will be covered by NHS England you must ensure that you have appropriate travel insurance and inform your insurance company that you are taking part in the trial. This is to ensure that all other treatment costs and hospital stays abroad are covered by your own insurance should you relapse. We have developed a travel guide to be followed should you decide to travel outside of the country while you are participating in the withdrawal study.

To minimise the risks of taking part in the study, we will only include you in the study if you:

- Have been on Eculizumab treatment for at least 6 months;
- Are in remission;
- Have a stable kidney function;
- Are willing to attend for safety monitoring assessments;
- Are willing to travel only to countries that can supply Eculizumab (to be confirmed with co-ordinating centre prior to travel);
- Are able to perform and record self-monitoring urinalysis.



Sexually active females of child bearing age must:

- Have a negative pregnancy test at screening and be using an effective contraception for the duration of the study (please ask your doctor/nurse).

OR

- fulfil one of the following criteria:
  - Be post-menopausal
  - Have undergone surgical sterilisation

You will not be able to take part if you:

- have lost a previous transplant kidney to recurrent aHUS;
- Are currently or are planning pregnancy;
- Are unable to comply with safety monitoring assessments;
- Are currently participating in another clinical trial (not including participation in aHUS registries)

### **What will happen to me if I take part?**

**If you consent to withdraw from Eculizumab Treatment, you will complete the following visits:**

#### **Screening Visit**

You will be asked to attend a screening visit at the hospital or clinic where you usually receive your Eculizumab treatment or if you receive your treatment at home, you will be asked to attend the hospital where your clinician is based. If you decide to take part you will complete a consent form. You will be given a unique patient ID number that will be written on your consent form and all questionnaires and samples that you provide in the study. This ID number will only be linked to you at your hospital and so nobody outside of your direct clinical care team will know that the information and samples belong to you.

If you are a female of child bearing age you will be required to have a pregnancy test at the screening visit after you have signed the consent form. You will receive your last Eculizumab infusion at the screening visit. Please be aware that you will continue to take your meningococcal prophylaxis for 4 weeks following this last Eculizumab infusion.

We will also collect information from your medical notes about your medical history after you have signed the consent form.

#### **Baseline Visit**

Your baseline visit will be 2 weeks (+/-2 days) after your screening visit on the day that you would usually receive your next dose of Eculizumab. You will not receive the infusion but will

[Trust Headed Paper]

attend your usual hospital or clinic to have your blood pressure and temperature checked. You will also have a blood and urine test and complete questionnaires about your health.

### **Study Visits**

You will be reviewed at the hospital weekly for the first month, then alternate weeks until month 6, then monthly thereafter until the end of the study period (month 24).

At each study visit you will have a blood and urine test and answer questions about how your health has been since your last visit.

You will also be required to complete questionnaires at your hospital visits twice in month 1, and once in the following months, 3, 6, 9, 12, 18 & 24. These will ask about your health, quality of life, medications and about use of NHS services and your out of pocket expenses relating to health care. It should take between 20 and 30 minutes to complete these questionnaires each time.

Overall you will be attending 34 visits over the 24 month period which includes the screening and baseline visit. You will not be required to attend more visits than you would usually if you were to stay on your current treatment. If you currently receive your Eculizumab infusions at home you will need to come in to the hospital for the study visits as these cannot be carried out at your home.

You will be required to carry out urine tests at home and to document this in a patient diary. You will be given a 30-minute training session during your baseline visit that will explain everything that you will need to do to carry this out at home.

You will also be given a small card to carry which will include information on the trial. If you attend **ANY** hospital or clinic for treatment outside of your scheduled follow-up visits you **MUST** give the doctor this card so that they are able to contact the trial team.

### **If you continue with your Eculizumab treatment and consent to completing the questionnaires only;**

You will receive the questionnaires by post on 8 occasions over the 24-month period. This should take you around 20-30 minutes to complete. You will be required to post the completed questionnaires back to the research team at Newcastle University using the pre-paid envelope supplied. The questionnaires will not contain any identifiable information relating to you as your unique patient ID will be written on the questionnaires when you receive them.

### **Will participating in research affect my treatment?**

If you decide to take part in the withdrawal component of the trial then you will no longer receive your Eculizumab treatment. If you decide to take part in the questionnaire part of the trial only, your Eculizumab treatment will remain the same.

## **What will happen if I don't want to carry on with the study?**

You may withdraw from the study at any time without giving a reason. If you decide to go back on to Eculizumab treatment we would like you to continue to be followed up by the study team. You may wish to withdraw completely from the study and further follow up and so we would not collect any further information about you to be used in the study. However, we would like to use the information and blood samples previously provided. If you decide that you don't want any of the information or blood samples already provided to be used in the study please contact a member of the study team so it can be removed from analysis.

## **Will I be paid for taking part?**

If you receive re-imburement for travel to clinics this will continue. If you currently receive your Eculizumab treatment at home, you may qualify to be reimbursed for travel to clinics for your follow up visits. Your doctor can give you more information about this. You will not be paid for taking part in this study.

## **Part 2**

## **Will my GP be told about my involvement in this study?**

If you decide to take part in this study and consent to have your GP informed, then we will inform your GP. Your participation in the study will also be noted in your medical records.

## **Will my taking part in research be kept confidential?**

All of the data we collect will be kept strictly confidential and in accordance with the General Data Protection Regulation (GDPR).

The Newcastle Upon Tyne Hospitals NHS Foundation Trust (NUTH) is the sponsor for this study based in the United Kingdom and will act as the "data controller" for this study. **They are responsible for looking after your information and using it properly.** This study is managed on behalf of the sponsor by the Newcastle Clinical Trials Unit (NCTU) who will act as the "data processor". As data processor, NCTU are responsible for processing personal data on behalf of the data controller. The Newcastle Clinical Trials Unit based at Newcastle University would like to receive a copy of your consent form for safety purposes. This will be destroyed once it has been reviewed. No other identifiable information will be received by the Newcastle Clinical Trials Unit

Your rights to access, change or move your information are limited, as we need to manage your information in specific ways in order for the research to be reliable and accurate. If you withdraw from the study, we will keep the information about you that we have already

[Trust Headed Paper]

obtained. To safeguard your rights, we will use the minimum personally-identifiable information possible.

You can find out more about how we use your information at [www.newcastle-hospitals.org.uk/about-us/freedom-of-information\\_how-we-use-information.aspx](http://www.newcastle-hospitals.org.uk/about-us/freedom-of-information_how-we-use-information.aspx)

To find out more information about research and general use of patient information please refer to the Health Research Authority Website at [www.hra.nhs.uk/information-about-patients](http://www.hra.nhs.uk/information-about-patients)

The local study team at [NHS site] will use your name, [NHS number/CHI number] and contacts details to contact you about the research study, and make sure that relevant information about the study is recorded for your care, and to oversee the quality of the study. Individuals from the sponsor, Newcastle Clinical Trials Unit and regulatory organisations may look at your medical and research records to check the accuracy of the research study. The local study team will pass these details to the sponsor or the Newcastle Clinical Trials Unit along with information collected from you and/or your medical records. The only people at sponsor or the Newcastle Clinical Trials Unit who will have access to information that identifies you will be people who need to audit the data collection process. The people who analyse the information will not be able to identify you and will not be able to find out your name, [NHS number/CHI number] or contact details.

The local study team at [NHS site] will keep identifiable information about you from this study for 5 years after the study has finished.

When you agree to take part in a research study, the information about your health and care may be provided to researchers running other research studies in this organisation and in other organisations. These organisations may be universities, NHS organisations or companies involved in health and care research in this country or abroad. Your information will only be used by organisations and researchers to conduct research in accordance with the UK Policy Framework for Health and Social Care Research and will not contain any personal identifiable information such as your name, [NHS number/CHI number] or contact details.

This information will not identify you and will not be combined with other information in a way that could identify you. The information will only be used for the purpose of health and care research and cannot be used to contact you or to affect your care. It will not be used to make decisions about future services available to you, such as insurance.

The blood samples that you provide will be sent to Newcastle University to be analysed and will have your unique ID number on them but no personal identifiable information attached. Once the study is finished, these samples will be stored at the Newcastle University biobank and may be used in future aHUS research. Please let us know if you do not want your samples used in future research.

## **What will happen to the results of the research study?**

Whenever possible we will publish the results of our studies in scientific journals. We also plan to present data at scientific conferences. You will not be named in any publication or presentation of the study results. We would also like to send you a newsletter with a summary of our results. Please let the research team know if you want to receive the newsletter. Results will also be available at the end of the study on the atypical HUS website which can be found at the following web address:

<http://www.atypicalhus.co.uk/>

## **Who is organising and funding the research?**

This study is funded by the National Institute for Health Research (NIHR). The study is sponsored and indemnified by the Newcastle Upon Tyne NHS Foundation Trust and indemnified by Newcastle University. The Newcastle Clinical Trials Unit is managing the study.

## **Who has reviewed the study?**

All research in the NHS is looked at by an independent group of people called a NHS Research Ethics Committee (REC). This is to protect your interests. This study has been reviewed and given a favourable opinion by the North East – Tyne & Wear South Research Ethics Committee and has been approved by the NHS Health Research Authority (HRA). The study has also been given approval by the Medicines and Healthcare products Regulatory Agency (MHRA).

## **What if relevant new information becomes available?**

The study team will ensure that you are receiving the most appropriate and up to date medical care that you require.

## **What if something goes wrong?**

If you have a concern about any aspect of the study please contact your local doctor (see contact details below). Alternatively, you can contact one of the researchers running this study and discuss your concerns.

### **Your local contact people for the study are:**

#### Contact Details of local PI:

Name:  
Address:  
Phone:  
Email:

#### Contact details of local Research Nurse:

Name:  
Address:  
Phone:  
Email:

**The Newcastle Trial Team contact is:**

**Contact Details of Trial Manager:**  
Name: Sarah Dunn  
Address: 1-2 Claremont Terrace,  
NCTU, Newcastle University, NE2 4AE  
Phone: 0191 208 2521  
Email: sarah.dunn2@ncl.ac.uk

If you are still unhappy and wish to complain formally and confidentially you can do this through the NHS complaints procedure by speaking to a member of the PALS (Patient Advise and Liaison Service) on 0800 0320 202 or by visiting [www.PALS.nhs.uk](http://www.PALS.nhs.uk).

In the event that something goes wrong and you are harmed during the research due to someone's negligence, then you may have grounds for a legal action for compensation against Newcastle upon-Tyne Hospitals NHS Foundation Trust but you may have to pay your legal costs.

**How have patients and the public been involved in this study?**

Our patient representative group has helped to design the study and study documents.

The group will meet when the trial is near completion to have input into the interpretation of the results. Their views of withdrawal and the safety results from the study will be considered. This will inform the publication of results. The groups views on the dissemination of results will also be considered.

**Thank you for taking time to read this information sheet**



# SETS aHUS: Stopping Eculizumab Treatment Safely in aHUS

The holder of this card has a rare disease known as atypical Haemolytic Uraemic Syndrome and is taking part in a clinical trial to assess the safe withdrawal of Eculizumab treatment. Because of this, the holder of this card may suffer a **relapse**.

If the holder presents unwell, however minor the illness, please evaluate immediately and obtain the following Laboratory investigations as their Eculizumab treatment and prophylactic antibiotics may need to be re-started as soon as possible and **within 24hrs**:

• U&E • FBC • LDH

If the results are abnormal, **immediately** contact the local medical team and refer to the UK National aHUS Service website for advice. Contact details on reverse side.

# SETS aHUS: Stopping Eculizumab Treatment Safely in aHUS

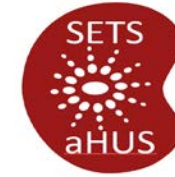

**Patients Local Medical team: +44 (0).....**

**UK National aHUS Service: +44 (0)191 2820385**  
(from 9am to 5pm GMT)

**Outside of these hours, please contact the Newcastle Hospitals  
Switchboard and request to speak to the clinician on call for the  
aHUS Service on +44 (0)191 233 6161**

**[www.atypicalhus.co.uk](http://www.atypicalhus.co.uk)**



|                                               |                                                                                                                                                                                                                                                                                                                                                                                                                                                                                                                                                                                                                                                                                                                                                                                                                  |
|-----------------------------------------------|------------------------------------------------------------------------------------------------------------------------------------------------------------------------------------------------------------------------------------------------------------------------------------------------------------------------------------------------------------------------------------------------------------------------------------------------------------------------------------------------------------------------------------------------------------------------------------------------------------------------------------------------------------------------------------------------------------------------------------------------------------------------------------------------------------------|
| Primary registry and trial identifying number | ISRCTN<br>ISRCTN17503205                                                                                                                                                                                                                                                                                                                                                                                                                                                                                                                                                                                                                                                                                                                                                                                         |
| Date of registration in primary registry      | 20 April 2018                                                                                                                                                                                                                                                                                                                                                                                                                                                                                                                                                                                                                                                                                                                                                                                                    |
| Secondary identifying numbers                 | EudraCT: 2017-003916-37                                                                                                                                                                                                                                                                                                                                                                                                                                                                                                                                                                                                                                                                                                                                                                                          |
| Source(s) of monetary or material support     | NIHR HTA                                                                                                                                                                                                                                                                                                                                                                                                                                                                                                                                                                                                                                                                                                                                                                                                         |
| Primary sponsor                               | Newcastle Upon Tyne Hospitals NHS FT – Christopher Price<br><a href="mailto:christoper.price6@nhs.uk">christoper.price6@nhs.uk</a>                                                                                                                                                                                                                                                                                                                                                                                                                                                                                                                                                                                                                                                                               |
| Secondary sponsor(s)                          | N/A                                                                                                                                                                                                                                                                                                                                                                                                                                                                                                                                                                                                                                                                                                                                                                                                              |
| Contact for public queries                    | Trial Manager – Sarah Dunn <a href="mailto:sarah.dunn2@newcastle.ac.uk">sarah.dunn2@newcastle.ac.uk</a>                                                                                                                                                                                                                                                                                                                                                                                                                                                                                                                                                                                                                                                                                                          |
| Contact for scientific queries                | Chief Investigator – Professor Neil Sheerin <a href="mailto:neil.sheerin@newcastle.ac.uk">neil.sheerin@newcastle.ac.uk</a>                                                                                                                                                                                                                                                                                                                                                                                                                                                                                                                                                                                                                                                                                       |
| Public title                                  | Stopping Eculizumab Treatment Safely in aHUS (SETS aHUS)                                                                                                                                                                                                                                                                                                                                                                                                                                                                                                                                                                                                                                                                                                                                                         |
| Scientific title                              | Multicentre, open label, prospective, single arm study of safety impact of Eculizumab withdrawal                                                                                                                                                                                                                                                                                                                                                                                                                                                                                                                                                                                                                                                                                                                 |
| Countries of recruitment                      | England and Scotland                                                                                                                                                                                                                                                                                                                                                                                                                                                                                                                                                                                                                                                                                                                                                                                             |
| Health condition(s) or problem(s) studied     | atypical Haemolytic Uraemic Syndrome                                                                                                                                                                                                                                                                                                                                                                                                                                                                                                                                                                                                                                                                                                                                                                             |
| Intervention(s)                               | Withdrawal of Eculizumab                                                                                                                                                                                                                                                                                                                                                                                                                                                                                                                                                                                                                                                                                                                                                                                         |
| Key inclusion and exclusion criteria          | <p>Key inclusion criteria:</p> <ul style="list-style-type: none"> <li>• Age <math>\geq 2+</math> years of age,</li> <li>• On Eculizumab treatment for at least 6 months,</li> <li>• In remission with no evidence of ongoing microangiopathic haemolytic anaemia (MAHA) activity at screening defined by: <ul style="list-style-type: none"> <li>- Platelet count &gt; lower limit of normal as determined by local reference range,</li> <li>- Lactate Dehydrogenase (LDH) &lt;x2 upper limit of normal as determined by local lab reference ranges,</li> </ul> </li> <li>• Normal renal function or Chronic Kidney Disease (CKD) stages 1-3,</li> <li>• Absence of decline of renal function confirmed by review of available assessments of renal function for the preceding 6 months by the Chief</li> </ul> |

|                         |                                                                                                                                                                                                                                                                                                                                                                                                                                                                                                                                                                                                                                                                                                                                                                                                                                                                                                                                                                                                                                                                                                                                                                                                                                                                                                                                                                                                                                          |
|-------------------------|------------------------------------------------------------------------------------------------------------------------------------------------------------------------------------------------------------------------------------------------------------------------------------------------------------------------------------------------------------------------------------------------------------------------------------------------------------------------------------------------------------------------------------------------------------------------------------------------------------------------------------------------------------------------------------------------------------------------------------------------------------------------------------------------------------------------------------------------------------------------------------------------------------------------------------------------------------------------------------------------------------------------------------------------------------------------------------------------------------------------------------------------------------------------------------------------------------------------------------------------------------------------------------------------------------------------------------------------------------------------------------------------------------------------------------------|
|                         | <p>Investigator (CI) and clinical members of the Trial Management Group (TMG).</p> <p>Key Exclusion Criteria:</p> <ul style="list-style-type: none"> <li>• Severe non-renal disease manifestations at initial presentation with aHUS, which in the opinion of the Chief Investigator and/or the clinical members of the TMG makes the risk of treatment withdrawal unacceptable,</li> <li>• Current or planned pregnancy within the study duration,</li> <li>• Unable to give informed consent or assent, or unable to obtain parent/guardian consent if under 16 years of age,</li> <li>• Current participation in another clinical trial (not including participation in aHUS registries),</li> <li>• Severe, uncontrolled hypertension (systolic blood pressure &gt;160 mmHg) that is likely to induce at TMA.</li> </ul>                                                                                                                                                                                                                                                                                                                                                                                                                                                                                                                                                                                                             |
| Study type              | <p>Allocation: non-randomized</p> <p>Masking: open label</p> <p>Primary purpose: Safety</p> <p>Phase IIb</p>                                                                                                                                                                                                                                                                                                                                                                                                                                                                                                                                                                                                                                                                                                                                                                                                                                                                                                                                                                                                                                                                                                                                                                                                                                                                                                                             |
| Date of first enrolment | November 2018                                                                                                                                                                                                                                                                                                                                                                                                                                                                                                                                                                                                                                                                                                                                                                                                                                                                                                                                                                                                                                                                                                                                                                                                                                                                                                                                                                                                                            |
| Target sample size      | 50: 30 withdrawal and 20 non-withdrawal                                                                                                                                                                                                                                                                                                                                                                                                                                                                                                                                                                                                                                                                                                                                                                                                                                                                                                                                                                                                                                                                                                                                                                                                                                                                                                                                                                                                  |
| Recruitment status      | Recruiting                                                                                                                                                                                                                                                                                                                                                                                                                                                                                                                                                                                                                                                                                                                                                                                                                                                                                                                                                                                                                                                                                                                                                                                                                                                                                                                                                                                                                               |
| Primary outcome(s)      | To determine the safety of Eculizumab withdrawal in patients with aHUS                                                                                                                                                                                                                                                                                                                                                                                                                                                                                                                                                                                                                                                                                                                                                                                                                                                                                                                                                                                                                                                                                                                                                                                                                                                                                                                                                                   |
| Key secondary outcomes  | <p>1. The effectiveness of a monitoring protocol to detect disease relapse following withdrawal of Eculizumab assessed by:</p> <p>1.1. The proportion of patients who relapse and restart Eculizumab without the development of a TMA-related SAE</p> <p>1.2. The time from the first clinical feature (symptom, positive urinalysis or laboratory result) of a relapse of TMA and the re-introduction of Eculizumab</p> <p>This outcome is ongoing and not measured at any particular timepoint</p> <p>2. The relapse rate after withdrawal of Eculizumab as determined by the proportion of patients who relapse after Eculizumab is withdrawn. This outcome is ongoing and not measured at any particular time point. A patient could relapse at any point in the 2 years participation period.</p> <p>3. The proportion of patients, currently on long-term treatment with Eculizumab, who can be maintained off treatment. This outcome is measured at the end of the trial when all relapse data is collected. A patient could relapse at any point in the 2 years participation period.</p> <p>4. The period from withdrawal to relapse in those patients who restart treatment. This outcome is measured at the end of the trial when all relapse data is collected.</p> <p>5. The change in estimated GFR as calculated by the CKD-EPI or modified Schwartz equations over the course of the study from baseline (day 0) to</p> |

|  |                                                                                                                                                                                                                                                                                                                                                                                                                                                                                                                                                                                                                                                                                                                                                                                                                                                                                                                                                                                                                                                                                                                                                                                                                                                                                                                                                                                                                                                       |
|--|-------------------------------------------------------------------------------------------------------------------------------------------------------------------------------------------------------------------------------------------------------------------------------------------------------------------------------------------------------------------------------------------------------------------------------------------------------------------------------------------------------------------------------------------------------------------------------------------------------------------------------------------------------------------------------------------------------------------------------------------------------------------------------------------------------------------------------------------------------------------------------------------------------------------------------------------------------------------------------------------------------------------------------------------------------------------------------------------------------------------------------------------------------------------------------------------------------------------------------------------------------------------------------------------------------------------------------------------------------------------------------------------------------------------------------------------------------|
|  | <p>end of the study. This outcome is calculated at the end of the trial when all GFR data is collected. GFR data is collected at all 34 visits.</p> <p>6. Important clinical and laboratory indicators of imminent relapse by review of reported symptoms, physical signs, urinalysis and laboratory results prior to the diagnosis of a relapse. This outcome will be assessed at the end of the trial when all relapse data is collected. Those who have relapsed will have all data preceding relapse reviewed to establish a relapse profile.</p> <p>7. The costs and health outcomes (measured in terms of adverse events and quality-adjusted life years [QALYs]) for patients on standard care (not withdrawing from Eculizumab treatment) over the two-year trial duration:</p> <p>7.1. Healthcare Utilisation Questionnaires for non-withdrawal participants at Day 0, 14, 70,154, 252, 336, 504 and 672.</p> <p>7.2. Adverse Event Assessment at every visit from Day 7 (32 visits) for withdrawal participants.</p> <p>8. QALYs estimated from responses to the EQ-5D-5L, and SF-36 and determinants of QALYs/utilities over the 24-month follow-up period. at Day 0, 14, 70,154, 252, 336, 504 and 672.</p> <p>9. Model-based estimate of the costs and health consequences, with results presented in terms of cost per QALY gained, over the estimated lifetime of patients withdrawing from treatment compared with standard care.</p> |
|--|-------------------------------------------------------------------------------------------------------------------------------------------------------------------------------------------------------------------------------------------------------------------------------------------------------------------------------------------------------------------------------------------------------------------------------------------------------------------------------------------------------------------------------------------------------------------------------------------------------------------------------------------------------------------------------------------------------------------------------------------------------------------------------------------------------------------------------------------------------------------------------------------------------------------------------------------------------------------------------------------------------------------------------------------------------------------------------------------------------------------------------------------------------------------------------------------------------------------------------------------------------------------------------------------------------------------------------------------------------------------------------------------------------------------------------------------------------|

review only

# Reporting checklist for protocol of a clinical trial.

Based on the SPIRIT guidelines.

## Instructions to authors

Complete this checklist by entering the page numbers from your manuscript where readers will find each of the items listed below.

Your article may not currently address all the items on the checklist. Please modify your text to include the missing information. If you are certain that an item does not apply, please write "n/a" and provide a short explanation.

Upload your completed checklist as an extra file when you submit to a journal.

In your methods section, say that you used the SPIRIT reporting guidelines, and cite them as:

Chan A-W, Tetzlaff JM, Gøtzsche PC, Altman DG, Mann H, Berlin J, Dickersin K, Hróbjartsson A, Schulz KF, Parulekar WR, Krleža-Jerić K, Laupacis A, Moher D. SPIRIT 2013 Explanation and Elaboration: Guidance for protocols of clinical trials. *BMJ*. 2013;346:e7586

|                                   | Reporting Item                                                                                                                  | Page Number                  |
|-----------------------------------|---------------------------------------------------------------------------------------------------------------------------------|------------------------------|
| <b>Administrative information</b> |                                                                                                                                 |                              |
| Title                             | <a href="#">#1</a> Descriptive title identifying the study design, population, interventions, and, if applicable, trial acronym | 1                            |
| Trial registration                | <a href="#">#2a</a> Trial identifier and registry name. If not yet registered, name of intended registry                        | 3                            |
| Trial registration: data set      | <a href="#">#2b</a> All items from the World Health Organization Trial Registration Data Set                                    | 3, 4, 6, 7, 8, 9, 13, 16, 20 |
| Protocol version                  | <a href="#">#3</a> Date and version identifier                                                                                  | 3                            |
| Funding                           | <a href="#">#4</a> Sources and types of financial, material, and other support                                                  | 16                           |

|    |                     |                     |                                    |                                       |
|----|---------------------|---------------------|------------------------------------|---------------------------------------|
| 1  | Roles and           | <a href="#">#5a</a> | Names, affiliations, and roles of  | 1                                     |
| 2  | responsibilities:   |                     | protocol contributors              |                                       |
| 3  | contributorship     |                     |                                    |                                       |
| 4  |                     |                     |                                    |                                       |
| 5  |                     |                     |                                    |                                       |
| 6  | Roles and           | <a href="#">#5b</a> | Name and contact information for   | 13 and 17                             |
| 7  | responsibilities:   |                     | the trial sponsor                  |                                       |
| 8  | sponsor contact     |                     |                                    |                                       |
| 9  | information         |                     |                                    |                                       |
| 10 |                     |                     |                                    |                                       |
| 11 |                     |                     |                                    |                                       |
| 12 |                     |                     |                                    |                                       |
| 13 | Roles and           | <a href="#">#5c</a> | Role of study sponsor and          | NA – sponsor and funder do not        |
| 14 | responsibilities:   |                     | funders, if any, in study design;  | have involvement in these activities. |
| 15 | sponsor and         |                     | collection, management,            |                                       |
| 16 | funder              |                     | analysis, and interpretation of    |                                       |
| 17 |                     |                     | data; writing of the report; and   |                                       |
| 18 |                     |                     | the decision to submit the report  |                                       |
| 19 |                     |                     | for publication, including whether |                                       |
| 20 |                     |                     | they will have ultimate authority  |                                       |
| 21 |                     |                     | over any of these activities       |                                       |
| 22 |                     |                     |                                    |                                       |
| 23 |                     |                     |                                    |                                       |
| 24 |                     |                     |                                    |                                       |
| 25 |                     |                     |                                    |                                       |
| 26 |                     |                     |                                    |                                       |
| 27 | Roles and           | <a href="#">#5d</a> | Composition, roles, and            | 11, 12 and 13                         |
| 28 | responsibilities:   |                     | responsibilities of the            |                                       |
| 29 | committees          |                     | coordinating centre, steering      |                                       |
| 30 |                     |                     | committee, endpoint adjudication   |                                       |
| 31 |                     |                     | committee, data management         |                                       |
| 32 |                     |                     | team, and other individuals or     |                                       |
| 33 |                     |                     | groups overseeing the trial, if    |                                       |
| 34 |                     |                     | applicable (see Item 21a for data  |                                       |
| 35 |                     |                     | monitoring committee)              |                                       |
| 36 |                     |                     |                                    |                                       |
| 37 |                     |                     |                                    |                                       |
| 38 |                     |                     |                                    |                                       |
| 39 |                     |                     |                                    |                                       |
| 40 |                     |                     |                                    |                                       |
| 41 |                     |                     |                                    |                                       |
| 42 | <b>Introduction</b> |                     |                                    |                                       |
| 43 |                     |                     |                                    |                                       |
| 44 | Background and      | <a href="#">#6a</a> | Description of research question   | 4                                     |
| 45 | rationale           |                     | and justification for undertaking  |                                       |
| 46 |                     |                     | the trial, including summary of    |                                       |
| 47 |                     |                     | relevant studies (published and    |                                       |
| 48 |                     |                     | unpublished) examining benefits    |                                       |
| 49 |                     |                     | and harms for each intervention    |                                       |
| 50 |                     |                     |                                    |                                       |
| 51 |                     |                     |                                    |                                       |
| 52 |                     |                     |                                    |                                       |
| 53 |                     |                     |                                    |                                       |
| 54 | Background and      | <a href="#">#6b</a> | Explanation for choice of          | n/a – the trial withdraws patients    |
| 55 | rationale: choice   |                     | comparators                        | from their current medication, no     |
| 56 | of comparators      |                     |                                    | comparator required                   |
| 57 |                     |                     |                                    |                                       |
| 58 |                     |                     |                                    |                                       |
| 59 |                     |                     |                                    |                                       |
| 60 |                     |                     |                                    |                                       |

|    |                       |                      |                                        |         |
|----|-----------------------|----------------------|----------------------------------------|---------|
| 1  | Objectives            | <a href="#">#7</a>   | Specific objectives or hypotheses      | 4 and 5 |
| 2  |                       |                      |                                        |         |
| 3  | Trial design          | <a href="#">#8</a>   | Description of trial design            | 4       |
| 4  |                       |                      | including type of trial (eg, parallel  |         |
| 5  |                       |                      | group, crossover, factorial, single    |         |
| 6  |                       |                      | group), allocation ratio, and          |         |
| 7  |                       |                      | framework (eg, superiority,            |         |
| 8  |                       |                      | equivalence, non-inferiority,          |         |
| 9  |                       |                      | exploratory)                           |         |
| 10 |                       |                      |                                        |         |
| 11 |                       |                      |                                        |         |
| 12 |                       |                      |                                        |         |
| 13 |                       |                      |                                        |         |
| 14 | <b>Methods:</b>       |                      |                                        |         |
| 15 | <b>Participants,</b>  |                      |                                        |         |
| 16 | <b>interventions,</b> |                      |                                        |         |
| 17 | <b>and outcomes</b>   |                      |                                        |         |
| 18 |                       |                      |                                        |         |
| 19 |                       |                      |                                        |         |
| 20 |                       |                      |                                        |         |
| 21 | Study setting         | <a href="#">#9</a>   | Description of study settings (eg,     | 6       |
| 22 |                       |                      | community clinic, academic             |         |
| 23 |                       |                      | hospital) and list of countries        |         |
| 24 |                       |                      | where data will be collected.          |         |
| 25 |                       |                      | Reference to where list of study       |         |
| 26 |                       |                      | sites can be obtained                  |         |
| 27 |                       |                      |                                        |         |
| 28 |                       |                      |                                        |         |
| 29 |                       |                      |                                        |         |
| 30 |                       |                      |                                        |         |
| 31 | Eligibility criteria  | <a href="#">#10</a>  | Inclusion and exclusion criteria       | 6       |
| 32 |                       |                      | for participants. If applicable,       |         |
| 33 |                       |                      | eligibility criteria for study centres |         |
| 34 |                       |                      | and individuals who will perform       |         |
| 35 |                       |                      | the interventions (eg, surgeons,       |         |
| 36 |                       |                      | psychotherapists)                      |         |
| 37 |                       |                      |                                        |         |
| 38 |                       |                      |                                        |         |
| 39 |                       |                      |                                        |         |
| 40 |                       |                      |                                        |         |
| 41 | Interventions:        | <a href="#">#11a</a> | Interventions for each group with      | 7       |
| 42 | description           |                      | sufficient detail to allow             |         |
| 43 |                       |                      | replication, including how and         |         |
| 44 |                       |                      | when they will be administered         |         |
| 45 |                       |                      |                                        |         |
| 46 |                       |                      |                                        |         |
| 47 |                       |                      |                                        |         |
| 48 | Interventions:        | <a href="#">#11b</a> | Criteria for discontinuing or          | 9       |
| 49 | modifications         |                      | modifying allocated interventions      |         |
| 50 |                       |                      | for a given trial participant (eg,     |         |
| 51 |                       |                      | drug dose change in response to        |         |
| 52 |                       |                      | harms, participant request, or         |         |
| 53 |                       |                      | improving / worsening disease)         |         |
| 54 |                       |                      |                                        |         |
| 55 |                       |                      |                                        |         |
| 56 |                       |                      |                                        |         |
| 57 |                       |                      |                                        |         |
| 58 |                       |                      |                                        |         |
| 59 |                       |                      |                                        |         |
| 60 |                       |                      |                                        |         |

|    |                  |                      |                                    |                                   |
|----|------------------|----------------------|------------------------------------|-----------------------------------|
| 1  | Interventions:   | <a href="#">#11c</a> | Strategies to improve adherence    | 9 – monitoring of home urinalysis |
| 2  | adherence        |                      | to intervention protocols, and any |                                   |
| 3  |                  |                      | procedures for monitoring          |                                   |
| 4  |                  |                      | adherence (eg, drug tablet return; |                                   |
| 5  |                  |                      | laboratory tests)                  |                                   |
| 6  |                  |                      |                                    |                                   |
| 7  |                  |                      |                                    |                                   |
| 8  |                  |                      |                                    |                                   |
| 9  | Interventions:   | <a href="#">#11d</a> | Relevant concomitant care and      | 7 – relating to meningococcal     |
| 10 | concomitant care |                      | interventions that are permitted   | prophylaxis. No other concomitant |
| 11 |                  |                      | or prohibited during the trial     | medication requirements imposed   |
| 12 |                  |                      |                                    | by the trial                      |
| 13 |                  |                      |                                    |                                   |
| 14 |                  |                      |                                    |                                   |
| 15 |                  |                      |                                    |                                   |
| 16 | Outcomes         | <a href="#">#12</a>  | Primary, secondary, and other      | 5                                 |
| 17 |                  |                      | outcomes, including the specific   |                                   |
| 18 |                  |                      | measurement variable (eg,          |                                   |
| 19 |                  |                      | systolic blood pressure), analysis |                                   |
| 20 |                  |                      | metric (eg, change from baseline,  |                                   |
| 21 |                  |                      | final value, time to event),       |                                   |
| 22 |                  |                      | method of aggregation (eg,         |                                   |
| 23 |                  |                      | median, proportion), and time      |                                   |
| 24 |                  |                      | point for each outcome.            |                                   |
| 25 |                  |                      | Explanation of the clinical        |                                   |
| 26 |                  |                      | relevance of chosen efficacy and   |                                   |
| 27 |                  |                      | harm outcomes is strongly          |                                   |
| 28 |                  |                      | recommended                        |                                   |
| 29 |                  |                      |                                    |                                   |
| 30 |                  |                      |                                    |                                   |
| 31 |                  |                      |                                    |                                   |
| 32 |                  |                      |                                    |                                   |
| 33 |                  |                      |                                    |                                   |
| 34 |                  |                      |                                    |                                   |
| 35 |                  |                      |                                    |                                   |
| 36 | Participant      | <a href="#">#13</a>  | Time schedule of enrolment,        | 7                                 |
| 37 | timeline         |                      | interventions (including any run-  |                                   |
| 38 |                  |                      | ins and washouts), assessments,    |                                   |
| 39 |                  |                      | and visits for participants. A     |                                   |
| 40 |                  |                      | schematic diagram is highly        |                                   |
| 41 |                  |                      | recommended (see Figure)           |                                   |
| 42 |                  |                      |                                    |                                   |
| 43 |                  |                      |                                    |                                   |
| 44 |                  |                      |                                    |                                   |
| 45 |                  |                      |                                    |                                   |
| 46 | Sample size      | <a href="#">#14</a>  | Estimated number of participants   | 6 and 10                          |
| 47 |                  |                      | needed to achieve study            |                                   |
| 48 |                  |                      | objectives and how it was          |                                   |
| 49 |                  |                      | determined, including clinical and |                                   |
| 50 |                  |                      | statistical assumptions            |                                   |
| 51 |                  |                      | supporting any sample size         |                                   |
| 52 |                  |                      | calculations                       |                                   |
| 53 |                  |                      |                                    |                                   |
| 54 |                  |                      |                                    |                                   |
| 55 |                  |                      |                                    |                                   |
| 56 |                  |                      |                                    |                                   |
| 57 |                  |                      |                                    |                                   |
| 58 |                  |                      |                                    |                                   |
| 59 |                  |                      |                                    |                                   |
| 60 |                  |                      |                                    |                                   |

|    |                        |                      |                                     |                          |
|----|------------------------|----------------------|-------------------------------------|--------------------------|
| 1  | Recruitment            | <a href="#">#15</a>  | Strategies for achieving adequate   | 6                        |
| 2  |                        |                      | participant enrolment to reach      |                          |
| 3  |                        |                      | target sample size                  |                          |
| 4  |                        |                      |                                     |                          |
| 5  |                        |                      |                                     |                          |
| 6  | <b>Methods:</b>        |                      |                                     |                          |
| 7  |                        |                      |                                     |                          |
| 8  | <b>Assignment of</b>   |                      |                                     |                          |
| 9  | <b>interventions</b>   |                      |                                     |                          |
| 10 | <b>(for controlled</b> |                      |                                     |                          |
| 11 | <b>trials)</b>         |                      |                                     |                          |
| 12 |                        |                      |                                     |                          |
| 13 |                        |                      |                                     |                          |
| 14 | Allocation:            | <a href="#">#16a</a> | Method of generating the            | NA- non-randomised trial |
| 15 | sequence               |                      | allocation sequence (eg,            |                          |
| 16 | generation             |                      | computer-generated random           |                          |
| 17 |                        |                      | numbers), and list of any factors   |                          |
| 18 |                        |                      | for stratification. To reduce       |                          |
| 19 |                        |                      | predictability of a random          |                          |
| 20 |                        |                      | sequence, details of any planned    |                          |
| 21 |                        |                      | restriction (eg, blocking) should   |                          |
| 22 |                        |                      | be provided in a separate           |                          |
| 23 |                        |                      | document that is unavailable to     |                          |
| 24 |                        |                      | those who enrol participants or     |                          |
| 25 |                        |                      | assign interventions                |                          |
| 26 |                        |                      |                                     |                          |
| 27 |                        |                      |                                     |                          |
| 28 |                        |                      |                                     |                          |
| 29 |                        |                      |                                     |                          |
| 30 |                        |                      |                                     |                          |
| 31 |                        |                      |                                     |                          |
| 32 |                        |                      |                                     |                          |
| 33 | Allocation             | <a href="#">#16b</a> | Mechanism of implementing the       | NA- non-blinded          |
| 34 | concealment            |                      | allocation sequence (eg, central    |                          |
| 35 | mechanism              |                      | telephone; sequentially             |                          |
| 36 |                        |                      | numbered, opaque, sealed            |                          |
| 37 |                        |                      | envelopes), describing any steps    |                          |
| 38 |                        |                      | to conceal the sequence until       |                          |
| 39 |                        |                      | interventions are assigned          |                          |
| 40 |                        |                      |                                     |                          |
| 41 |                        |                      |                                     |                          |
| 42 |                        |                      |                                     |                          |
| 43 |                        |                      |                                     |                          |
| 44 | Allocation:            | <a href="#">#16c</a> | Who will generate the allocation    | NA- non-randomised trial |
| 45 | implementation         |                      | sequence, who will enrol            |                          |
| 46 |                        |                      | participants, and who will assign   |                          |
| 47 |                        |                      | participants to interventions       |                          |
| 48 |                        |                      |                                     |                          |
| 49 |                        |                      |                                     |                          |
| 50 |                        |                      |                                     |                          |
| 51 | Blinding               | <a href="#">#17a</a> | Who will be blinded after           | N/A – non-blinded        |
| 52 | (masking)              |                      | assignment to interventions (eg,    |                          |
| 53 |                        |                      | trial participants, care providers, |                          |
| 54 |                        |                      | outcome assessors, data             |                          |
| 55 |                        |                      | analysts), and how                  |                          |
| 56 |                        |                      |                                     |                          |
| 57 |                        |                      |                                     |                          |
| 58 |                        |                      |                                     |                          |
| 59 |                        |                      |                                     |                          |
| 60 |                        |                      |                                     |                          |



|    |                      |                      |                                     |                  |
|----|----------------------|----------------------|-------------------------------------|------------------|
| 1  | Blinding             | <a href="#">#17b</a> | If blinded, circumstances under     | NA – non-blinded |
| 2  | (masking):           |                      | which unblinding is permissible,    |                  |
| 3  | emergency            |                      | and procedure for revealing a       |                  |
| 4  | unblinding           |                      | participant's allocated             |                  |
| 5  |                      |                      | intervention during the trial       |                  |
| 6  |                      |                      |                                     |                  |
| 7  |                      |                      |                                     |                  |
| 8  |                      |                      |                                     |                  |
| 9  | <b>Methods: Data</b> |                      |                                     |                  |
| 10 | <b>collection,</b>   |                      |                                     |                  |
| 11 | <b>management,</b>   |                      |                                     |                  |
| 12 | <b>and analysis</b>  |                      |                                     |                  |
| 13 |                      |                      |                                     |                  |
| 14 |                      |                      |                                     |                  |
| 15 |                      |                      |                                     |                  |
| 16 | Data collection      | <a href="#">#18a</a> | Plans for assessment and            | 7                |
| 17 | plan                 |                      | collection of outcome, baseline,    |                  |
| 18 |                      |                      | and other trial data, including any |                  |
| 19 |                      |                      | related processes to promote        |                  |
| 20 |                      |                      | data quality (eg, duplicate         |                  |
| 21 |                      |                      | measurements, training of           |                  |
| 22 |                      |                      | assessors) and a description of     |                  |
| 23 |                      |                      | study instruments (eg,              |                  |
| 24 |                      |                      | questionnaires, laboratory tests)   |                  |
| 25 |                      |                      | along with their reliability and    |                  |
| 26 |                      |                      | validity, if known. Reference to    |                  |
| 27 |                      |                      | where data collection forms can     |                  |
| 28 |                      |                      | be found, if not in the protocol    |                  |
| 29 |                      |                      |                                     |                  |
| 30 |                      |                      |                                     |                  |
| 31 |                      |                      |                                     |                  |
| 32 |                      |                      |                                     |                  |
| 33 |                      |                      |                                     |                  |
| 34 |                      |                      |                                     |                  |
| 35 |                      |                      |                                     |                  |
| 36 | Data collection      | <a href="#">#18b</a> | Plans to promote participant        | 9, 12 and 13     |
| 37 | plan: retention      |                      | retention and complete follow-up,   |                  |
| 38 |                      |                      | including list of any outcome data  |                  |
| 39 |                      |                      | to be collected for participants    |                  |
| 40 |                      |                      | who discontinue or deviate from     |                  |
| 41 |                      |                      | intervention protocols              |                  |
| 42 |                      |                      |                                     |                  |
| 43 |                      |                      |                                     |                  |
| 44 |                      |                      |                                     |                  |
| 45 |                      |                      |                                     |                  |
| 46 | Data                 | <a href="#">#19</a>  | Plans for data entry, coding,       | 13               |
| 47 | management           |                      | security, and storage, including    |                  |
| 48 |                      |                      | any related processes to promote    |                  |
| 49 |                      |                      | data quality (eg, double data       |                  |
| 50 |                      |                      | entry; range checks for data        |                  |
| 51 |                      |                      | values). Reference to where         |                  |
| 52 |                      |                      | details of data management          |                  |
| 53 |                      |                      | procedures can be found, if not in  |                  |
| 54 |                      |                      | the protocol                        |                  |
| 55 |                      |                      |                                     |                  |
| 56 |                      |                      |                                     |                  |
| 57 |                      |                      |                                     |                  |
| 58 |                      |                      |                                     |                  |
| 59 |                      |                      |                                     |                  |
| 60 |                      |                      |                                     |                  |

|    |                      |                      |                                     |               |
|----|----------------------|----------------------|-------------------------------------|---------------|
| 1  | Statistics:          | <a href="#">#20a</a> | Statistical methods for analysing   | 10, 12 and 13 |
| 2  | outcomes             |                      | primary and secondary               |               |
| 3  |                      |                      | outcomes. Reference to where        |               |
| 4  |                      |                      | other details of the statistical    |               |
| 5  |                      |                      | analysis plan can be found, if not  |               |
| 6  |                      |                      | in the protocol                     |               |
| 7  |                      |                      |                                     |               |
| 8  |                      |                      |                                     |               |
| 9  |                      |                      |                                     |               |
| 10 | Statistics:          | <a href="#">#20b</a> | Methods for any additional          | 12 and 13     |
| 11 | additional           |                      | analyses (eg, subgroup and          |               |
| 12 | analyses             |                      | adjusted analyses)                  |               |
| 13 |                      |                      |                                     |               |
| 14 |                      |                      |                                     |               |
| 15 |                      |                      |                                     |               |
| 16 | Statistics: analysis | <a href="#">#20c</a> | Definition of analysis population   | 12            |
| 17 | population and       |                      | relating to protocol non-           |               |
| 18 | missing data         |                      | adherence (eg, as randomised        |               |
| 19 |                      |                      | analysis), and any statistical      |               |
| 20 |                      |                      | methods to handle missing data      |               |
| 21 |                      |                      | (eg, multiple imputation)           |               |
| 22 |                      |                      |                                     |               |
| 23 |                      |                      |                                     |               |
| 24 |                      |                      |                                     |               |
| 25 |                      |                      |                                     |               |
| 26 | <b>Methods:</b>      |                      |                                     |               |
| 27 | <b>Monitoring</b>    |                      |                                     |               |
| 28 |                      |                      |                                     |               |
| 29 |                      |                      |                                     |               |
| 30 | Data monitoring:     | <a href="#">#21a</a> | Composition of data monitoring      | 11,12 and 13  |
| 31 | formal committee     |                      | committee (DMC); summary of its     |               |
| 32 |                      |                      | role and reporting structure;       |               |
| 33 |                      |                      | statement of whether it is          |               |
| 34 |                      |                      | independent from the sponsor        |               |
| 35 |                      |                      | and competing interests; and        |               |
| 36 |                      |                      | reference to where further details  |               |
| 37 |                      |                      | about its charter can be found, if  |               |
| 38 |                      |                      | not in the protocol. Alternatively, |               |
| 39 |                      |                      | an explanation of why a DMC is      |               |
| 40 |                      |                      | not needed                          |               |
| 41 |                      |                      |                                     |               |
| 42 |                      |                      |                                     |               |
| 43 |                      |                      |                                     |               |
| 44 |                      |                      |                                     |               |
| 45 |                      |                      |                                     |               |
| 46 |                      |                      |                                     |               |
| 47 | Data monitoring:     | <a href="#">#21b</a> | Description of any interim          | 11 and 12     |
| 48 | interim analysis     |                      | analyses and stopping               |               |
| 49 |                      |                      | guidelines, including who will      |               |
| 50 |                      |                      | have access to these interim        |               |
| 51 |                      |                      | results and make the final          |               |
| 52 |                      |                      | decision to terminate the trial     |               |
| 53 |                      |                      |                                     |               |
| 54 |                      |                      |                                     |               |
| 55 |                      |                      |                                     |               |
| 56 |                      |                      |                                     |               |
| 57 | Harms                | <a href="#">#22</a>  | Plans for collecting, assessing,    | 9 and 10      |
| 58 |                      |                      | reporting, and managing solicited   |               |
| 59 |                      |                      |                                     |               |
| 60 |                      |                      |                                     |               |

|    |                      |                      |                                       |    |
|----|----------------------|----------------------|---------------------------------------|----|
| 1  |                      |                      | and spontaneously reported            |    |
| 2  |                      |                      | adverse events and other              |    |
| 3  |                      |                      | unintended effects of trial           |    |
| 4  |                      |                      | interventions or trial conduct        |    |
| 5  |                      |                      |                                       |    |
| 6  |                      |                      |                                       |    |
| 7  | Auditing             | <a href="#">#23</a>  | Frequency and procedures for          | 13 |
| 8  |                      |                      | auditing trial conduct, if any, and   |    |
| 9  |                      |                      | whether the process will be           |    |
| 10 |                      |                      | independent from investigators        |    |
| 11 |                      |                      | and the sponsor                       |    |
| 12 |                      |                      |                                       |    |
| 13 |                      |                      |                                       |    |
| 14 |                      |                      |                                       |    |
| 15 | <b>Ethics and</b>    |                      |                                       |    |
| 16 | <b>dissemination</b> |                      |                                       |    |
| 17 |                      |                      |                                       |    |
| 18 |                      |                      |                                       |    |
| 19 | Research ethics      | <a href="#">#24</a>  | Plans for seeking research ethics     | 14 |
| 20 | approval             |                      | committee / institutional review      |    |
| 21 |                      |                      | board (REC / IRB) approval            |    |
| 22 |                      |                      |                                       |    |
| 23 |                      |                      |                                       |    |
| 24 | Protocol             | <a href="#">#25</a>  | Plans for communicating               | 13 |
| 25 | amendments           |                      | important protocol modifications      |    |
| 26 |                      |                      | (eg, changes to eligibility criteria, |    |
| 27 |                      |                      | outcomes, analyses) to relevant       |    |
| 28 |                      |                      | parties (eg, investigators, REC /     |    |
| 29 |                      |                      | IRBs, trial participants, trial       |    |
| 30 |                      |                      | registries, journals, regulators)     |    |
| 31 |                      |                      |                                       |    |
| 32 |                      |                      |                                       |    |
| 33 |                      |                      |                                       |    |
| 34 |                      |                      |                                       |    |
| 35 |                      |                      |                                       |    |
| 36 | Consent or assent    | <a href="#">#26a</a> | Who will obtain informed consent      | 7  |
| 37 |                      |                      | or assent from potential trial        |    |
| 38 |                      |                      | participants or authorised            |    |
| 39 |                      |                      | surrogates, and how (see Item         |    |
| 40 |                      |                      | 32)                                   |    |
| 41 |                      |                      |                                       |    |
| 42 |                      |                      |                                       |    |
| 43 |                      |                      |                                       |    |
| 44 | Consent or           | <a href="#">#26b</a> | Additional consent provisions for     | 7  |
| 45 | assent: ancillary    |                      | collection and use of participant     |    |
| 46 | studies              |                      | data and biological specimens in      |    |
| 47 |                      |                      | ancillary studies, if applicable      |    |
| 48 |                      |                      |                                       |    |
| 49 |                      |                      |                                       |    |
| 50 |                      |                      |                                       |    |
| 51 | Confidentiality      | <a href="#">#27</a>  | How personal information about        | 13 |
| 52 |                      |                      | potential and enrolled                |    |
| 53 |                      |                      | participants will be collected,       |    |
| 54 |                      |                      | shared, and maintained in order       |    |
| 55 |                      |                      | to protect confidentiality before,    |    |
| 56 |                      |                      | during, and after the trial           |    |
| 57 |                      |                      |                                       |    |
| 58 |                      |                      |                                       |    |
| 59 |                      |                      |                                       |    |
| 60 |                      |                      |                                       |    |

|    |                       |                      |                                      |                                                                              |
|----|-----------------------|----------------------|--------------------------------------|------------------------------------------------------------------------------|
| 1  | Declaration of        | <a href="#">#28</a>  | Financial and other competing        | 16                                                                           |
| 2  | interests             |                      | interests for principal              |                                                                              |
| 3  |                       |                      | investigators for the overall trial  |                                                                              |
| 4  |                       |                      | and each study site                  |                                                                              |
| 5  |                       |                      |                                      |                                                                              |
| 6  |                       |                      |                                      |                                                                              |
| 7  |                       |                      |                                      |                                                                              |
| 8  | Data access           | <a href="#">#29</a>  | Statement of who will have           | 13                                                                           |
| 9  |                       |                      | access to the final trial dataset,   |                                                                              |
| 10 |                       |                      | and disclosure of contractual        |                                                                              |
| 11 |                       |                      | agreements that limit such           |                                                                              |
| 12 |                       |                      | access for investigators             |                                                                              |
| 13 |                       |                      |                                      |                                                                              |
| 14 |                       |                      |                                      |                                                                              |
| 15 |                       |                      |                                      |                                                                              |
| 16 | Ancillary and post    | <a href="#">#30</a>  | Provisions, if any, for ancillary    | 7 – post trial safety monitoring                                             |
| 17 | trial care            |                      | and post-trial care, and for         |                                                                              |
| 18 |                       |                      | compensation to those who            |                                                                              |
| 19 |                       |                      | suffer harm from trial participation |                                                                              |
| 20 |                       |                      |                                      |                                                                              |
| 21 |                       |                      |                                      |                                                                              |
| 22 |                       |                      |                                      |                                                                              |
| 23 | Dissemination         | <a href="#">#31a</a> | Plans for investigators and          | 14                                                                           |
| 24 | policy: trial results |                      | sponsor to communicate trial         |                                                                              |
| 25 |                       |                      | results to participants, healthcare  |                                                                              |
| 26 |                       |                      | professionals, the public, and       |                                                                              |
| 27 |                       |                      | other relevant groups (eg, via       |                                                                              |
| 28 |                       |                      | publication, reporting in results    |                                                                              |
| 29 |                       |                      | databases, or other data sharing     |                                                                              |
| 30 |                       |                      | arrangements), including any         |                                                                              |
| 31 |                       |                      | publication restrictions             |                                                                              |
| 32 |                       |                      |                                      |                                                                              |
| 33 |                       |                      |                                      |                                                                              |
| 34 |                       |                      |                                      |                                                                              |
| 35 |                       |                      |                                      |                                                                              |
| 36 |                       |                      |                                      |                                                                              |
| 37 | Dissemination         | <a href="#">#31b</a> | Authorship eligibility guidelines    | 16                                                                           |
| 38 | policy: authorship    |                      | and any intended use of              |                                                                              |
| 39 |                       |                      | professional writers                 |                                                                              |
| 40 |                       |                      |                                      |                                                                              |
| 41 |                       |                      |                                      |                                                                              |
| 42 |                       |                      |                                      |                                                                              |
| 43 | Dissemination         | <a href="#">#31c</a> | Plans, if any, for granting public   | 13                                                                           |
| 44 | policy:               |                      | access to the full protocol,         |                                                                              |
| 45 | reproducible          |                      | participant-level dataset, and       |                                                                              |
| 46 | research              |                      | statistical code                     |                                                                              |
| 47 |                       |                      |                                      |                                                                              |
| 48 |                       |                      |                                      |                                                                              |
| 49 | <b>Appendices</b>     |                      |                                      |                                                                              |
| 50 |                       |                      |                                      |                                                                              |
| 51 |                       |                      |                                      |                                                                              |
| 52 | Informed consent      | <a href="#">#32</a>  | Model consent form and other         | N/A – not included but can be                                                |
| 53 | materials             |                      | related documentation given to       | requested from the Trial Manager                                             |
| 54 |                       |                      | participants and authorised          | Sarah Dunn                                                                   |
| 55 |                       |                      | surrogates                           | <a href="mailto:sarah.dunn2@newcastle.ac.uk">sarah.dunn2@newcastle.ac.uk</a> |
| 56 |                       |                      |                                      |                                                                              |
| 57 |                       |                      |                                      |                                                                              |
| 58 |                       |                      |                                      |                                                                              |
| 59 |                       |                      |                                      |                                                                              |
| 60 |                       |                      |                                      |                                                                              |

|   |            |                     |                                     |                                                                              |
|---|------------|---------------------|-------------------------------------|------------------------------------------------------------------------------|
| 1 | Biological | <a href="#">#33</a> | Plans for collection, laboratory    | N/A – not included, laboratory                                               |
| 2 | specimens  |                     | evaluation, and storage of          | manual can be requested from the                                             |
| 3 |            |                     | biological specimens for genetic    | Trial Manager Sarah Dunn                                                     |
| 4 |            |                     | or molecular analysis in the        | <a href="mailto:sarah.dunn2@newcastle.ac.uk">sarah.dunn2@newcastle.ac.uk</a> |
| 5 |            |                     | current trial and for future use in |                                                                              |
| 6 |            |                     | ancillary studies, if applicable    |                                                                              |
| 7 |            |                     |                                     |                                                                              |
| 8 |            |                     |                                     |                                                                              |
| 9 |            |                     |                                     |                                                                              |

10  
11 None The SPIRIT Explanation and Elaboration paper is distributed under the terms of the Creative  
12 Commons Attribution License CC-BY-NC. This checklist can be completed online using  
13 <https://www.goodreports.org/>, a tool made by the [EQUATOR Network](#) in collaboration with  
14 [Penelope.ai](#)  
15  
16  
17  
18  
19  
20  
21  
22  
23  
24  
25  
26  
27  
28  
29  
30  
31  
32  
33  
34  
35  
36  
37  
38  
39  
40  
41  
42  
43  
44  
45  
46  
47  
48  
49  
50  
51  
52  
53  
54  
55  
56  
57  
58  
59  
60

# BMJ Open

## Protocol for a multicentre, open label, prospective, single arm study of the safety and impact of eculizumab withdrawal in patients with atypical haemolytic uraemic syndrome

|                                 |                                                                                                                                                                                                                                                                                                                                                                                                                                                                                                                                                                                                                                                                                                                                                                                                                                                                                                                                                                                                                                                                                                                                                                                                                                                                                                                                                                                                                                                                                                                                                                                                       |
|---------------------------------|-------------------------------------------------------------------------------------------------------------------------------------------------------------------------------------------------------------------------------------------------------------------------------------------------------------------------------------------------------------------------------------------------------------------------------------------------------------------------------------------------------------------------------------------------------------------------------------------------------------------------------------------------------------------------------------------------------------------------------------------------------------------------------------------------------------------------------------------------------------------------------------------------------------------------------------------------------------------------------------------------------------------------------------------------------------------------------------------------------------------------------------------------------------------------------------------------------------------------------------------------------------------------------------------------------------------------------------------------------------------------------------------------------------------------------------------------------------------------------------------------------------------------------------------------------------------------------------------------------|
| Journal:                        | <i>BMJ Open</i>                                                                                                                                                                                                                                                                                                                                                                                                                                                                                                                                                                                                                                                                                                                                                                                                                                                                                                                                                                                                                                                                                                                                                                                                                                                                                                                                                                                                                                                                                                                                                                                       |
| Manuscript ID                   | bmjopen-2021-054536.R2                                                                                                                                                                                                                                                                                                                                                                                                                                                                                                                                                                                                                                                                                                                                                                                                                                                                                                                                                                                                                                                                                                                                                                                                                                                                                                                                                                                                                                                                                                                                                                                |
| Article Type:                   | Protocol                                                                                                                                                                                                                                                                                                                                                                                                                                                                                                                                                                                                                                                                                                                                                                                                                                                                                                                                                                                                                                                                                                                                                                                                                                                                                                                                                                                                                                                                                                                                                                                              |
| Date Submitted by the Author:   | 16-Aug-2022                                                                                                                                                                                                                                                                                                                                                                                                                                                                                                                                                                                                                                                                                                                                                                                                                                                                                                                                                                                                                                                                                                                                                                                                                                                                                                                                                                                                                                                                                                                                                                                           |
| Complete List of Authors:       | Dunn, Sarah; Newcastle University, Newcastle Clinical Trials Unit<br>Brocklebank, Victoria; Newcastle University, National Renal Complement Therapeutics Centre<br>Bryant, Andrew; Newcastle University, Population Health Sciences Institute<br>Carnell, Sonya; Newcastle University, Newcastle Clinical Trials Unit<br>Chadwick, Thomas; Newcastle University, Population Health Sciences Institute<br>Johnson, Sally; Newcastle Upon Tyne Hospitals NHS Foundation Trust, Great North Children's Hospital ; Newcastle University, National Renal Complement Therapeutics Centre<br>Kavanagh, David; Newcastle University, Translational and Clinical Research Institute ; Newcastle University, National Renal Complement Therapeutics Centre<br>Lecouturier, Jan; Newcastle University, Population Health Sciences Institute<br>Malina, Michal; Newcastle Upon Tyne Hospitals NHS Foundation Trust, Great North Children's Hospital; Newcastle University, National Renal Complement Therapeutics Centre<br>Moloney, Eoin; Optimax Access LTD, Health Economics<br>Oluboyede , Yemi; Newcastle University, Population Health Sciences Institute<br>Weetman, Christopher; Newcastle University, Newcastle Clinical Trials Unit<br>Wong, Edwin; Newcastle University, Translational and Clinical Research Institute ; Newcastle University, National Renal Complement Therapeutics Centre<br>Woodward, Len; aHUS alliance Global Action<br>Sheerin, Neil; Newcastle University, Translational and Clinical Research Institute ; Newcastle University, National Renal Complement Therapeutics Centre |
| <b>Primary Subject Heading</b>: | Renal medicine                                                                                                                                                                                                                                                                                                                                                                                                                                                                                                                                                                                                                                                                                                                                                                                                                                                                                                                                                                                                                                                                                                                                                                                                                                                                                                                                                                                                                                                                                                                                                                                        |
| Secondary Subject Heading:      | Qualitative research, Health economics                                                                                                                                                                                                                                                                                                                                                                                                                                                                                                                                                                                                                                                                                                                                                                                                                                                                                                                                                                                                                                                                                                                                                                                                                                                                                                                                                                                                                                                                                                                                                                |
| Keywords:                       | NEPHROLOGY, HEALTH ECONOMICS, QUALITATIVE RESEARCH                                                                                                                                                                                                                                                                                                                                                                                                                                                                                                                                                                                                                                                                                                                                                                                                                                                                                                                                                                                                                                                                                                                                                                                                                                                                                                                                                                                                                                                                                                                                                    |

1  
2  
3  
4  
5  
6  
7  
8  
9  
10  
11  
12  
13  
14  
15  
16  
17  
18  
19  
20  
21  
22  
23  
24  
25  
26  
27  
28  
29  
30  
31  
32  
33  
34  
35  
36  
37  
38  
39  
40  
41  
42  
43  
44  
45  
46  
47  
48  
49  
50  
51  
52  
53  
54  
55  
56  
57  
58  
59  
60



SCHOLARONE™  
Manuscripts

# Protocol for a multicentre, open label, prospective, single arm study of the safety and impact of eculizumab withdrawal in patients with atypical haemolytic uraemic syndrome

## Details of corresponding author

| Full name          | Postal address                                                                                                        | Email                                                            | ORCID ID            |
|--------------------|-----------------------------------------------------------------------------------------------------------------------|------------------------------------------------------------------|---------------------|
| Ms Sarah Dunn, MSc | Newcastle Clinical Trials Unit,<br>Newcastle University, 1-4 Claremont Terrace, Newcastle Upon Tyne, England, NE2 4AE | <a href="mailto:Sarah.dunn2@ncl.ac.uk">Sarah.dunn2@ncl.ac.uk</a> | 0000-0002-1901-3931 |

## Details of Co-authors

| Full name                                          | Department                                                                                                                       | Institution                                                                 | City                | Country | Email                                                                                          |
|----------------------------------------------------|----------------------------------------------------------------------------------------------------------------------------------|-----------------------------------------------------------------------------|---------------------|---------|------------------------------------------------------------------------------------------------|
| Dr Victoria Brocklebank, MBBS                      | National Renal Complement Therapeutics Centre                                                                                    | Newcastle University                                                        | Newcastle Upon Tyne | England | <a href="mailto:Victoria.Brocklebank@newcastle.ac.uk">Victoria.Brocklebank@newcastle.ac.uk</a> |
| Mr Andrew Bryant, MSc                              | Population Health Sciences                                                                                                       | Newcastle University                                                        | Newcastle Upon Tyne | England | <a href="mailto:andy.bryant@newcastle.ac.uk">andy.bryant@newcastle.ac.uk</a>                   |
| Dr Sonya Carnell PhD                               | Newcastle Clinical Trials Unit                                                                                                   | Newcastle University                                                        | Newcastle Upon Tyne | England | <a href="mailto:sonya_carnell@yahoo.com">sonya_carnell@yahoo.com</a>                           |
| Dr Thomas J Chadwick PhD                           | Population Health Sciences                                                                                                       | Newcastle University                                                        | Newcastle Upon Tyne | England | <a href="mailto:thomas.chadwick@newcastle.ac.uk">thomas.chadwick@newcastle.ac.uk</a>           |
| Dr Sally Johnson MB ChB MRCPCH, PhD                | Great North Children's Hospital, Translational and Clinical Research Institute and National Renal Complement Therapeutics Centre | Newcastle Upon Tyne Hospitals NHS Foundation Trust and Newcastle University | Newcastle Upon Tyne | England | <a href="mailto:sally.johnson15@nhs.net">sally.johnson15@nhs.net</a>                           |
| Professor David Kavanagh, MB, ChB, MRCP, PhD, FRCP | Translational and Clinical Research Institute and National Renal Complement Therapeutics Centre                                  | Newcastle University                                                        | Newcastle Upon Tyne | England | <a href="mailto:David.Kavanagh@newcastle.ac.uk">David.Kavanagh@newcastle.ac.uk</a>             |
| Ms Jan Lecouturier, MSc                            | Population Health Sciences                                                                                                       | Newcastle University                                                        | Newcastle Upon Tyne | England | <a href="mailto:jan.lecouturier@newcastle.ac.uk">jan.lecouturier@newcastle.ac.uk</a>           |



|                                                          |                                          |                                                                                                 |                                                                             |                     |         |                                                                                              |
|----------------------------------------------------------|------------------------------------------|-------------------------------------------------------------------------------------------------|-----------------------------------------------------------------------------|---------------------|---------|----------------------------------------------------------------------------------------------|
| 1<br>2<br>3<br>4<br>5<br>6<br>7<br>8<br>9                | Dr Michal Malina, MD, PhD, FRCPCH        | Great North Children's Hospital and National Renal Complement Therapeutics Centre               | Newcastle Upon Tyne Hospitals NHS Foundation Trust And Newcastle University | Newcastle Upon Tyne | England | <a href="mailto:michal.malina@nhs.net">michal.malina@nhs.net</a>                             |
| 10<br>11<br>12<br>13                                     | Mr Eoin Moloney, MSc                     | Health Economics                                                                                | Optimax Access LTD                                                          | Newcastle Upon Tyne | England | <a href="mailto:eoim.moloney@optimaxaccess.com">eoim.moloney@optimaxaccess.com</a>           |
| 14<br>15<br>16                                           | Dr Yemi Oluboyede PhD                    | Population Health Sciences                                                                      | Newcastle University                                                        | Newcastle Upon Tyne | England | <a href="mailto:yemi.oluboyede@newcastle.ac.uk">yemi.oluboyede@newcastle.ac.uk</a>           |
| 17<br>18<br>19<br>20                                     | Mr Christopher Weetman, BSc              | Newcastle Clinical Trials Unit                                                                  | Newcastle University                                                        | Newcastle Upon Tyne | England | <a href="mailto:christopher.weetman@newcastle.ac.uk">christopher.weetman@newcastle.ac.uk</a> |
| 21<br>22<br>23<br>24<br>25<br>26<br>27<br>28<br>29       | Dr Edwin Kwan Soon Wong, MBChB, PhD MRCP | Translational and Clinical Research Institute and National Renal Complement Therapeutics Centre | Newcastle University                                                        | Newcastle Upon Tyne | England | <a href="mailto:edwin.wong@newcastle.ac.uk">edwin.wong@newcastle.ac.uk</a>                   |
| 30<br>31<br>32<br>33                                     | Mr Len Woodward                          | N/A                                                                                             | aHUS alliance Global Action                                                 | Newcastle Upon Tyne | England | <a href="mailto:len.woodward@ntlworld.com">len.woodward@ntlworld.com</a>                     |
| 34<br>35<br>36<br>37<br>38<br>39<br>40<br>41<br>42<br>43 | Professor Neil Sheerin, MBBS, PhD, MRCP  | Translational and Clinical Research Institute and National Renal Complement Therapeutics Centre | Newcastle University                                                        | Newcastle Upon Tyne | England | <a href="mailto:Neil.Sheerin@newcastle.ac.uk">Neil.Sheerin@newcastle.ac.uk</a>               |

44  
45  
46  
47  
48  
49  
50  
51  
52  
53  
54  
55  
56  
57  
58  
59  
60

**Word Count: 4653**

## ABSTRACT

### Introduction

Atypical haemolytic uraemic syndrome (aHUS) is a rare, life threatening disease caused by excessive activation of part of the immune system called complement. Eculizumab is an effective treatment, controlling aHUS in 90% of patients. Due to the risk of relapse, lifelong treatment is currently recommended. Eculizumab treatment is not without problems, foremost being the risk of severe meningococcal infection, the burden of bi-weekly intravenous injections and the high cost.

This paper describes the design of the Stopping Eculizumab Treatment Safely in aHUS (SETS aHUS) trial that aims to establish whether a safety monitoring protocol, including the reintroduction of Eculizumab for those who relapse, could be a safe, alternative treatment strategy for patients with aHUS.

### Methods and analysis

This is a multi-centre, non-randomised, open label study of Eculizumab withdrawal with continuous monitoring of thrombotic microangiopathy (TMA) related serious adverse events using the Bayes factor single arm design. 30 patients will be recruited to withdraw from Eculizumab and have regular blood and urine tests for 24 months, to monitor for disease activity. If relapse occurs, treatment will be restarted within 24 hours of presentation. 20 patients will remain on treatment and complete health economic questionnaires only. An embedded qualitative study will explore the views of participants.

### Ethics and dissemination

A favourable ethical opinion and approval was obtained from the North East - Tyne & Wear South Research Ethics Committee. Outcomes will be disseminated via peer-reviewed articles and conference presentations.

### Trial registration

EudraCT Number: 2017-003916-37

ISRCTN number: ISRCTN17503205

Date of Registration: 20 April 2018

### Keywords

atypical Haemolytic Uraemic Syndrome, qualitative research, Complement, Eculizumab

### Article summary

Strengths and limitations of this study

- This is the first UK trial to evaluate the safety of eculizumab withdrawal in patient with aHUS.

- This trial fulfils the NICE recommendation that a research programme, with robust methods, should be carried out to evaluate when stopping Eculizumab treatment or dose adjustment might occur.
- Clinical experience suggests if relapse occurs this will likely happen in the first 12 months of withdrawal however, this trial follows patients up for 24 months to capture those patients who may relapse after the 12-month point.
- The small number of aHUS patients on treatment in the UK is insufficient to conduct a standard parallel group, randomised controlled trial.
- COVID-19 has had an impact on recruitment.

### **Trial Status**

This manuscript is based upon trial protocol version 7.0 dated 14<sup>th</sup> January 2021. The first patient was recruited in November 2018, recruitment ended on 31<sup>st</sup> January 2022 and planned last patient visit is November 2023.

## INTRODUCTION

Atypical Haemolytic Uraemic Syndrome (aHUS) is a severe, life-threatening disease characterised by thrombocytopenia, microangiopathic haemolytic anaemia and Acute Kidney Injury (AKI), and other organ involvement. Historically it is associated with a poor prognosis, with 50% of patients developing end stage kidney disease or dying in the first year after presentation [1] and a high risk of disease recurrence after kidney transplantation [2]. Prior to 2011, treatment options were limited and relied on plasma infusion or exchange, but in many cases this treatment failed to influence the course of disease [1] and was itself associated with significant morbidity and mortality [3]. In the UK, the incidence of aHUS is 0.4-0.5 cases per million per year [4].

The complement system is part of the innate immune system and in healthy individuals is tightly regulated to prevent excessive activation. In 60-70% of patients with aHUS, a genetic variant or autoantibody increasing complement activation can be identified [10]. In these patients, excessive activation of complement leads to endothelial injury and thrombus formation. The underlying genetic variant that predisposes to disease has an influence on the severity of disease and the likelihood of recurrent disease developing after transplantation [5].

Eculizumab is a humanized monoclonal antibody that inhibits the function of C5, an important protein involved in complement activation. Two uncontrolled, open label trials involving 36 adult and adolescent patients demonstrated the efficacy of Eculizumab treatment for aHUS over a 26 week period [6]. Additional prospective studies in children [7] and adults [8] confirmed efficacy. Follow-up of the original cohort suggests that treatment for 2 years is associated with good, longer-term clinical outcomes [9]. On the basis of the initial trial results, Eculizumab was approved for the treatment of aHUS by the European Medicines Agency (EMA) [10] and U.S. Food & Drug Administration (FDA) [11] in 2011. The National Institute for Health and Care Excellence (NICE) published its evaluation in 2015, recommending that Eculizumab should be used for the treatment of aHUS [12]. A recommendation in the NICE evaluation was that funding was on the condition that there was a 'research programme with robust methods to evaluate when stopping treatment or dose adjustment might occur'.

Complement is part of the immune system, therefore, treatment with Eculizumab is immunosuppressive, in particular, increasing the risk of *Neisseria meningitidis* infection (1-2000 fold)[13, 14]. All patients are vaccinated against meningococcal infection before starting Eculizumab and in the UK continuous prophylactic antibiotics are recommended. Despite these recommendations, there have been 6 cases of meningococcal infection in the UK in patients on Eculizumab treatment for aHUS. We are also aware of uncommon infections occurring in this group (enteroviral pneumonitis and *Herpes simplex* meningitis) but whether these are attributable to Eculizumab treatment is unclear.

Although there have been reports of patients relapsing after the withdrawal of treatment [15], there is increasing evidence that continuous treatment is not required for all patients. From experience prior to the introduction of Eculizumab, the risk of relapse is greatest in the period immediately after first presentation with 82% of relapses in adults, and 57% of relapses in children occurring within the first year after disease onset.

Beyond the first year, only a further 20% of patients will relapse in the subsequent 5-10 years [1]. Therefore, a proportion of patients will not relapse after their initial presentation and will be on Eculizumab unnecessarily. In addition, with monitoring for relapse and early reintroduction of treatment, complications from relapse can be avoided [16-18].

In this trial we will test the safety of eculizumab withdrawal using a Bayesian trial design. The efficacy of self-monitoring will also be tested, and we will explore patients' and parents/legal guardians' views on how treatment and monitoring of disease can be delivered most effectively.

## METHODS AND ANALYSIS

### Objectives and outcome measures

#### Primary

The primary clinical objective is to determine the safety of Eculizumab withdrawal in patients with aHUS, measured by the number of patients with a Thrombotic microangiopathy (TMA) related Serious Adverse Event (SAE) defined as any of the following:

- Irreversible (>3 months) reduction in estimated glomerular filtration rate (eGFR) -not attributable to another cause:

#### *In adults*

- by  $\geq 20\%$  if the screening eGFR is  $< 90\text{mls/min/1.73m}^2$ ,
- by  $> 20\%$  to a level  $< 90\text{mls/min/1.73m}^2$  if the screening eGFR is  $> 90\text{mls/min/1.73m}^2$ .

#### *In children*

- by  $\geq 20\%$  if the screening eGFR is  $< 75\text{mls/min/1.73m}^2$ ,
- by  $> 20\%$  to a level  $< 75\text{mls/min/1.73m}^2$  if the screening eGFR is  $> 75\text{mls/min/1.73m}^2$ .
- An episode of AKI attributed to a TMA that requires renal replacement therapy.
- A non-renal manifestation of a TMA that require hospitalisation, cause irreversible organ damage or death.

#### Secondary

##### *Clinical*

1. Measure the effectiveness of a monitoring protocol to detect disease relapse following withdrawal of Eculizumab as assessed by:

- The proportion of patients who relapse and restart Eculizumab without the development of a TMA-related SAE.
- The time from the first clinical feature (symptom, positive urinalysis or laboratory result) of a relapse of TMA and the re-introduction of Eculizumab.

- 1 2. The relapse rate after withdrawal of Eculizumab as determined by the proportion of patients who relapse  
2 after Eculizumab is withdrawn.
- 3 3. The proportion of patients, currently on long-term treatment with Eculizumab, who can be maintained off  
4 treatment.
- 5 4. The period from withdrawal to relapse in those patients who restart treatment.
- 6 5. The change in estimated GFR as calculated by the CKD-EPI or modified Schwartz equations over the course  
7 of the study from baseline (day 0) to end of the study.
- 8 6. Important clinical and laboratory indicators of imminent relapse by review of reported symptoms, physical  
9 signs, urinalysis and laboratory results prior to the diagnosis of a relapse.

### 17 *Health Economic*

- 18 7. The costs and health outcomes (measured in terms of adverse events and quality-adjusted life years [QALYs])  
19 for patients on standard care (not withdrawing from Eculizumab treatment) over the two-year trial duration:  
20
  - 21 • Healthcare Utilisation Questionnaires for non-withdrawal participants at Day 0, 14, 70,154, 252, 336, 504  
22 and 672.
  - 23 • Adverse Event Assessment at every visit from Day 7 (32 visits) for withdrawal participants.
- 24 8. QALYs estimated from responses to the EQ-5D-5L, and SF-36 and determinants of QALYs/utilities over the  
25 24-month follow-up period. at Day 0, 14, 70,154, 252, 336, 504 and 672.
- 26 9. Model-based estimate of the costs and health consequences, with results presented in terms of cost per  
27 QALY gained, over the estimated lifetime of patients withdrawing from treatment compared with standard  
28 care.

### 37 **Trial Design**

38 This is a multi-centre, non-randomised, open label study of Eculizumab withdrawal with continuous monitoring  
39 of TMA related serious adverse events using the Bayes factor single arm design of Johnson and Cook [19]. The  
40 patients will self-select whether they wish to withdraw from Eculizumab and carry out the monitoring protocol  
41 or remain on treatment and be part of the Health Economic analysis-only. An economic analysis, informed by  
42 the results of this trial, will determine whether Eculizumab withdrawal, substituting treatment with a  
43 protocolised surveillance and treatment reintroduction strategy, is cost-effective. The patient visit schedule for  
44 the withdrawal cohort is shown in Figure 1, and the Health Economic cohort in Figure 2.

### 53 **Trial setting**

54 This multi-centre trial will be carried out in up to 20 adult and paediatric Renal units (secondary and tertiary  
55 care) in the UK who are using Eculizumab to treat patients with aHUS.

### 59 **Eligibility**

60 All patients must fulfil the following inclusion criteria in order to be eligible for the trial:

- 1 • Age  $\geq 2+$  years of age,
- 2
- 3 • On Eculizumab treatment for at least 6 months,
- 4
- 5 • In remission with no evidence of ongoing microangiopathic haemolytic anaemia (MAHA) activity at
- 6 screening defined by:
- 7
  - 8 - Platelet count  $>$  lower limit of normal as determined by local reference range,
  - 9 - Lactate Dehydrogenase (LDH)  $< 2$  upper limit of normal as determined by local lab reference ranges,
- 10
- 11 • Normal renal function or Chronic Kidney Disease (CKD) stages 1-3 (eGFR  $> 30$ mls/min/1.73m<sup>2</sup>),
- 12
- 13 • Absence of decline of renal function confirmed by review of available assessments of renal function for the
- 14 preceding 6 months by the Chief Investigator (CI) and clinical members of the Trial Management Group
- 15 (TMG).
- 16
- 17
- 18
- 19

20 The following inclusion criteria must be met only by those wishing to participate in the withdrawal component

21 of the trial:

- 22
- 23 • Willing to attend for safety monitoring assessments,
- 24
- 25 • Willing to travel only to countries that can supply Eculizumab (to be confirmed with co-ordinating centre
- 26 prior to travel),
- 27
- 28 • Able to perform or parent/guardian to perform and record self-monitoring urinalysis,
- 29
- 30 • Sexually active female patients must have a negative pregnancy test at screening and be using an effective
- 31 contraception for the duration of the study.
- 32
- 33

34 OR

- 35 • fulfil one of the following criteria:
- 36
  - 37 - Be post-menopausal,
  - 38 - Have undergone surgical sterilisation.
- 39
- 40

41 The following exclusion criteria is applicable to all patients wishing to participate in the trial:

- 42
- 43
- 44 • Severe non-renal disease manifestations at initial presentation with aHUS, which in the opinion of the Chief
- 45 Investigator and/or the clinical members of the TMG makes the risk of treatment withdrawal unacceptable,
- 46
- 47 • Current or planned pregnancy within the study duration,
- 48
- 49 • Unable to give informed consent or assent, or unable to obtain parent/guardian consent if under 16 years
- 50 of age,
- 51
- 52 • Current participation in another clinical trial (not including participation in aHUS registries),
- 53
- 54 • Severe, uncontrolled hypertension (systolic blood pressure  $> 160$  mmHg) that is likely to induce at TMA.
- 55
- 56

57 The following exclusion criteria is applicable only to those wishing to participate in the withdrawal component

58 of the trial:

- 59 • Loss of a previous transplant kidney to recurrent aHUS,
- 60 • Transplant recipient with a pathogenic mutation in *C3*, *CFH* or *CFB*,

- Haematuria rating of 3+.

## Screening and Recruitment

30 patients will be recruited to withdraw from Eculizumab treatment, and 20 patients will be recruited who will remain on treatment and complete the Health Economic questionnaires only.

Patients with a diagnosis of aHUS receiving Eculizumab [4] to treat disease in native or transplanted kidneys will be identified by the National aHUS Service, which maintains a list of patients who fulfil these criteria as part of the NHS England commissioned service. Those patients who meet the genetic eligibility criteria will be highlighted to site teams who will carry out formal screening assessments. A physical examination and vital signs will be performed, and routine safety laboratory tests will be reviewed to ensure that a patient fulfils all eligibility criteria for entry into the study. Female participants withdrawing from treatment, who are of childbearing age and sexually active, will be required to have a negative pregnancy test prior to treatment withdrawal. Participants will also consent to have samples taken for exploratory analysis and storage at Newcastle University biobank for use in future research.

Consent will be sought from the parents/legal guardian on behalf of patients under the age of 16. Assent will be taken from those patients under 16 years old, as appropriate (supplement 1). No trial related procedures will be carried out prior to consent.

## Intervention

Patients who consent to withdraw from Eculizumab will receive their last dose of Eculizumab during visit 1 (classed as day -14 prior to withdrawal).

## Visit Details and Assessments

Baseline Assessments & Data collection for withdrawal cohort (Visit 2, Day 0 +/- 2 days)

Study day 0 will be the day that the participants would usually receive their next dose of Eculizumab, based on standard dosing schedules (+/-2 days). The Eculizumab will not be administered however, meningococcal prophylaxis will be continued for a further 2 weeks after day 0.

At day 0 of the study (Visit 2), participants will undergo the following assessments:

Vital signs (temperature, pulse and blood pressure), Height & weight, renal function (creatinine and eGFR), Urinalysis and urine protein/creatinine ratio, haemolysis markers including platelet count, haemoglobin, LDH, Electrolyte Profile, Liver Function (Bilirubin, ALT/AST, ALP, LDH, serum calcium, phosphate, albumin & total protein), haptoglobin (if available) and blood film, concomitant medication review, health-related quality of life questionnaires (EQ-5D-5L and SF-36) and health care utilisation questionnaire. A biomarker and complement activation sample to identify predictors of relapse (for example soluble C5b-9) is also taken and stored at site before transfer to Newcastle University.



## Study Visit Assessments & Data collection for withdrawal cohort (Visits 3-34)

Participants will be assessed regularly for evidence of disease relapse for the 2-year duration of the study. The participants will attend a total of 32 safety monitoring visits over the 2-year withdrawal follow-up period.

Trial participants will be reviewed at the trial site weekly (+/- 2 days) for the first month, then alternate weeks (+/-2 days) until month 6, then monthly (+/- 7 days) thereafter until the end of the trial period (month 24). At each study visit, the participants will undergo the monitoring assessments as detailed in Figure 1.

Paediatric participants must have their weight recorded at every visit for calculation of eGFR. At the end of the trial, the level of safety monitoring for those patients who remain off treatment and disease free will be decided by their local clinical care team in discussion with the National aHUS Service.

Due to the COVID-19 pandemic, participants may be unable to attend their scheduled follow up visits or may be attending a local hospital to have safety bloods taken. If the participants are unable to attend site due to self-isolation or underlying health issues; where possible, a remote, follow-up call will be carried out by a member of the local research team. Participants will be asked to report changes to their concomitant medications, any adverse events experienced since their previous follow-up and the results of their home urinalysis tests.

### Health Economic Assessments

Participants, or their parent/legal guardian, in both withdrawal and Health Economics cohorts will complete the EQ-5D-5L (proxy version if patient < 12 years), SF36 (parent/legal guardian completes if patient <14 years) and a health care utilisation questionnaire at 8 timepoints. A time and travel questionnaire is completed at 1 timepoint, as detailed in Figures 1 and 2.

### Self-monitored Urinalysis

Withdrawal participants, or their parent/legal guardian, will be trained to perform and understand the results of home urinalysis. Urinalysis, for the presence of haematuria or haemoglobinuria as an indicator of intravascular haemolysis and therefore disease activity, will then be performed daily by the participant or parent/legal guardian for the first month and then three times per week for the remainder of the study period. The results will be recorded in a participant diary and will be reviewed at each study visit. Participants or their parent/legal guardian will report any significant change in urinalysis, not related to menstruation, using their own baseline result to guide them in relation to the thresholds as detailed in *Table 1*.

*Table 1. Home Urinalysis result thresholds*

| Baseline Haematuria result | Haematuria result threshold (not related to menstruation)     |
|----------------------------|---------------------------------------------------------------|
| Neg/Trace                  | ++ on any occasion OR + on any two occasions 24 hours apart   |
| +                          | +++ on any occasion OR ++ on any two occasions 24 hours apart |

|    |                     |
|----|---------------------|
| ++ | +++ on any occasion |
|----|---------------------|

If the threshold criteria are met, participants or their parent/legal guardian will contact their treatment site immediately to arrange an unscheduled visit to assess disease activity as outlined in *Figure 1*.

### **Trial Withdrawal**

Participants will have the right to withdraw from the study at any time for any reason, and without giving a reason. The investigator will also have the right to withdraw participants from the study if she/he judges this to be in their best interest. Those participants who have been withdrawn from treatment can request to restart treatment, even if they have not relapsed. Data and blood samples provided by the participant up until the point of withdrawal will be included in analysis, unless they specifically request to have this removed. Participants who withdraw from the trial will not be replaced.

### **Change in Health Status**

Participants will be advised to report any significant change in health status to the responsible site or local health care provider. Participants will be provided with a participant identification card to present to attending medical staff with details of the study, tests required and study centre and National aHUS Service contact details (Supplement 2). Sites will notify the participants' General Practitioner of their involvement in the study and inform them of the required action to be taken in the case of suspected relapse. Criteria for a diagnosis of aHUS relapse are shown in Figure 3.

If there is a clinical suspicion of disease activity, formal assessment will occur as outlined in *Figure 1*, Unscheduled visit column.

Any other adverse events that could represent a relapse will be discussed with the Investigators and/or the aHUS National Service. A decision to restart will be made according to current Service procedures.

### **Relapse Management**

When a relapse is diagnosed, participants will restart Eculizumab treatment within 24 hours of presentation provided there is no evidence of an active infection that would be a contra-indication to treatment at the recommended dose of 900mg weekly for the first 4 weeks then 1200mg every two weeks thereafter (or age adjusted dose and regime). TMA activity will be monitored (platelet count, LDH) as recommended by attending clinician until haematological remission is achieved as defined in Figure 4.

Participants who relapse and require re-introduction of Eculizumab treatment will remain on treatment in study under follow up for the full 2 years of the study. Home urinalysis will not be required after re-introduction of Eculizumab treatment.

1 Participants will consent to travel to only those countries where Eculizumab is available. If a participant relapses  
2 while they are travelling outside of the country, the National aHUS Service will make arrangements with the  
3 destination country to access and fund Eculizumab if required, with arrangements from the commissioning  
4 authority.  
5  
6  
7  
8  
9

### 10 **Embedded qualitative study**

11 In-depth one-to-one telephone interviews will be conducted following a topic guide developed with the input  
12 of the research team, including PPI. The intention is to keep interviews very broad to ensure we capture the full  
13 experience of interviewees.  
14  
15

16 Up to 30 patients who withdraw from Eculizumab and up to 20 patients who decline to withdraw will be  
17 approached to participate. Up to 20 patients who withdraw will be re-interviewed at the end of the withdrawal  
18 period (24 months later) to explore their views of the monitoring protocol. This group will be asked at the first  
19 interview if they agree to be contacted again towards the end of the study for a follow up interview. Where  
20 possible, any patients who relapse and go back onto treatment will also be interviewed. Consent will be  
21 recorded at the time of the interview. Interviews will be digitally recorded with the permission of the  
22 interviewee, transcribed verbatim and anonymised.  
23  
24  
25  
26  
27  
28  
29  
30

### 31 **Safety reporting**

32 All Adverse Events (AEs) occurring from the point of withdrawal (day 0) to end of study participation will be  
33 recorded. SAEs occurring from the point of withdrawal (day 0) must be reported to The Newcastle Clinical Trials  
34 Unit (NCTU) within 24 hours of the site becoming aware of the event. Serious Adverse Reactions (SARs) and  
35 Suspected Unexpected Serious Adverse Reactions (SUSARs) are reportable only for those participants who have  
36 Eculizumab treatment re-initiated during their participation in the trial. The assessment of expectedness will be  
37 performed by the PI at site against the approved Reference Safety Information (RSI) for the trial (Section 4.8 of  
38 the Soliris SmPC).  
39  
40  
41  
42  
43  
44  
45  
46

### 47 **Statistical Analysis**

#### 48 **Sample size**

49 A maximum of 30 patients will be recruited to the withdrawal component; this is judged to be reasonable given  
50 the rare nature of the disease. The specifics of this sample size are intrinsically linked to the Bayes factor single  
51 arm binary design employed to analyse the primary outcome measure. There is no allowance for loss to follow-  
52 up as this patient group is already subject to a high degree of clinical follow-up and death is defined as one of  
53 the serious events under consideration. 20 patients will be recruited to the non-withdrawal arm as a  
54 comparator group for health economic analysis only.  
55  
56  
57  
58  
59  
60

#### **Analysis**

This is a single arm, open label trial with the primary endpoint being a binary response (the presence/absence of a primary outcome event within the follow-up period). We will compare the rate of TMA-related serious adverse events (primary outcomes) following the withdrawal of medication to that of treatment-related serious adverse events, expected under standard care.

The Bayes factor single arm binary model [19] will be used to monitor the trial. Based on historical data, the event rate (treatment-related serious adverse events in 100 patients over a 2 year period) for the standard of care is 0.06, and we expect that withdrawal of the treatment would give a rate of 0.12. This choice of rate has been informed in discussion with patients. Using this Bayesian hypothesis test-based design, we assume the rate is 0.06 under the null, and 0.12 under the alternative hypothesis.

We assume that the sample distribution of number of responses follows a binomial distribution and use an inverse moment prior for response under the alternative hypothesis.

### Stopping Rules

A minimum of 5 patients will be enrolled before applying the stopping rules, and the cohort size for monitoring is 5 patients. The Data Monitoring Committee (DMC) can request earlier review if adverse events are reported before this point.

We implement two stopping rules:

(1) We will stop the trial for superiority (there being fewer TMA related serious adverse events on the intervention than would be expected under standard of care) if the posterior probability of the alternative hypothesis is less than 0.05, i.e.  $\Pr(H_1 | \text{Data}) < 0.05$ ;

(2) We will stop the trial for inferiority if the posterior probability of the alternative hypothesis is greater than 0.80, i.e.,  $\Pr(H_1 | \text{Data}) > 0.80$ .

### Operating Characteristics and Stopping Boundaries

The operating characteristics (Table 2) and stopping boundaries (Table 3) were produced using the M. D. Anderson Cancer Center Department of Biostatistics software BayesFactorBinary, version 1.0 [20]

Table 2. Operating Characteristics

| Scenario | True rate of treatment related serious adverse events | Probability of Stopping for Inferiority | Probability of Stopping for Superiority | Average number of patients treated (Percentiles: 10%, 25%, 50%, 75%, 90%) |
|----------|-------------------------------------------------------|-----------------------------------------|-----------------------------------------|---------------------------------------------------------------------------|
| 1        | 0.06                                                  | 0.096                                   | 0                                       | 28.44 (30, 30, 30, 30, 30)                                                |
| 2        | 0.12                                                  | 0.443                                   | 0                                       | 23.48 (5, 15, 30, 30, 30)                                                 |
| 3        | 0.18                                                  | 0.753                                   | 0                                       | 17.76 (5, 10, 15, 30, 30)                                                 |
| 4        | 0.24                                                  | 0.928                                   | 0                                       | 13.72 (5, 5, 15, 15, 30)                                                  |
| 5        | 0.30                                                  | 0.982                                   | 0                                       | 10.52 (5, 5, 10, 15, 20)                                                  |

If the true rate is 0.06 (Scenario 1, null hypothesis), the trial will stop with probabilities of 0.096 and 0 in favour of the alternative and null hypotheses, respectively. The average number of patients (10%, 90% percentiles) is 28.44 (30, 30). If the true rate is 0.12 (Scenario 2, alternative hypothesis), the trial will stop with probabilities of 0.443 and 0 in favour of the alternative and null hypotheses, respectively. The average number of patients (10%, 90%) is 23.48 (5, 30).

Table 3 – SETS aHUS Trial Stopping Boundaries

| Number of patients (in complete cohorts of 5) | <b>Stop</b> the trial for Superiority if there are this many TMA Events (inclusive) | <b>Continue</b> the trial if there are this many TMA Events (inclusive) | <b>Stop</b> the trial for Inferiority if there are this many TMA Events (inclusive) |
|-----------------------------------------------|-------------------------------------------------------------------------------------|-------------------------------------------------------------------------|-------------------------------------------------------------------------------------|
| 5                                             | Never stop for superiority with this many patients                                  | 0-1                                                                     | 2-5                                                                                 |
| 10 or 15                                      | Never stop for superiority with this many patients                                  | 0-2                                                                     | 3-15                                                                                |
| 20                                            | Never stop for superiority with this many patients                                  | 0-3                                                                     | 4-20                                                                                |
| 25 or 30                                      | Never stop for superiority with this many patients                                  | 0-4 (The trial always stops at 30 patients, which is the maximum)       | 5-30                                                                                |

The study will stop for inferiority with 2 TMA related serious adverse events in the first cohort of 5 participants. Subsequently, the study would stop if 3 or more TMA related serious adverse events are observed in the first 15 participants, 4 or more in the first 20 participants, and 5 or more in the whole study population. We are well placed to respond to any negative safety signal.

1000 repetitions were used in the software simulation. Calculations with different numbers of repetitions resulted in unchanged stopping boundaries with only marginal changes to the operating characteristics.

There may be differing risk of relapse according to disease aetiology. However, the available numbers do not allow for risk strata to be monitored separately. The DMC will consider this within their remit.

In addition to this ongoing analysis, at the end of the study, data will also be reported descriptively, together with the number of patients recruited. Descriptive statistics reported will be selected as appropriate to the specific outcome measure. For proportion outcomes, the number of patients recording the event will also be reported.

Due to the sample size, no comparative statistical methods will be applied. There will be no imputation of missing data and a complete case analysis will be undertaken.

### Subgroup Analyses

Except for the analysis of the primary outcome on an ongoing basis, the analyses described above may be reported separately for different genetic groups or risk strata.

### Health Economic analysis

## Within-trial assessments of costs and outcomes

Costs and health outcomes (measured in terms of resource use of primary and secondary health care NHS services and QALYs) associated with Eculizumab withdrawal (30 participants), compared with standard care (20 participants), will be assessed over the 24-month follow-up period. Information on costs and health outcomes will be recorded for each individual involved in both treatment groups. Data derived from the within-trial analysis will be assessed to understand the key determinants of differences in costs and outcomes between the two patient groups. Data will then be used to parameterise the lifetime economic model (combined with data from the literature).

## Assessment of cost-effectiveness

An economic decision model will be developed to assess the cost-effectiveness of the alternative treatment options under evaluation. Costs and health consequences, measured in terms of QALYs, associated with Eculizumab withdrawal, and a policy of monitoring following withdrawal, and standard care, beyond the two-year timeframe of the trial will be captured. We propose to conduct a cost-utility analysis, with results presented in terms of incremental cost per QALY gained.

## Qualitative analysis

We will take an inductive approach to data collection and analysis. This means there is no a priori theory; themes, concepts and theories will be elicited from the interview data when it is analysed and drawing upon relevant literature, PPI, and experts in the study team. Data will be analysed thematically using a constant comparative method. This entails a process of familiarisation with the data and then the development of a thematic framework. A small number of transcripts will be coded, and the framework amended accordingly. A second level analysis will be conducted using a constant comparative method. This involves a process of comparing and contrasting themes elicited from the data, within and across interviews [21]. NVivo will be used as a data management tool.

## Trial Management and monitoring

This trial is sponsored by the Newcastle Upon Tyne Hospitals NHS Foundation Trust. The trial will be co-ordinated by a TMG that will include those individuals responsible for the day-to-day management of the trial. A Trial Steering Committee (TSC) made up of independent clinical and lay members will provide overall supervision of the trial. A Data Monitoring Committee (DMC) composed of independent clinicians and statistician will undertake independent review and monitor efficacy and safety endpoints. The trial was prospectively registered on the International Standard Registered Clinical/soCial sTudy Number (ISRCTN) registry and the European Union Drug Regulating Authorities Clinical Trials Database (EudraCT) (supplement 3). The Newcastle Clinical Trials Unit (NCTU) will be responsible for communicating protocol amendments to participating sites and carrying out central, remote, and on-site monitoring.

## Confidentiality and data handling

Personal data will be regarded as strictly confidential. To preserve anonymity, a unique participant ID will be assigned to each participant at consent. Only the clinical team at the participating sites will have access to key data which links study identifiers to individual datasets. All study records and Investigator Site Files will be kept at site in a locked filing cabinet with restricted access.

Written consent will be sought from participants or legal guardians, if patient is under the age of 16 years, to allow access to their hospital records.

Data is recorded by authorised staff and stored in a secure web-based electronic data capture system (MACRO) designed and maintained by NCTU hosted on secure servers at Rackspace within the UK. Analysis of the data will be undertaken by the Newcastle University trial statisticians. Anonymised data from this trial may be available to the scientific community subject to regulatory and ethics approval. Requests for data should be directed to the corresponding author. All study data will be archived for 5 years.

## Patient and public involvement (PPI)

A PPI representative sits on the Trial Management Group, was involved in protocol and study document development, and is involved in ongoing trial management discussions. We also have an aHUS patient as an independent member of the Trial Steering Committee.

## ETHICS AND DISSEMINATION

A favourable ethical opinion and approval was obtained from the North East - Tyne & Wear South Research Ethics Committee in April 2018. Written informed consent will be obtained from all participants prior to their involvement in the trial. The results of the study will be submitted to peer-reviewed journals, presented at conferences and on the trial website.

## DISCUSSION

This study will determine whether it is safe to withdraw Eculizumab using a trial methodology designed to detect an excess of adverse outcomes following withdrawal (primary endpoint). The study will also estimate the proportion of patients with aHUS that can be maintained off Eculizumab and test a system for surveillance to identify relapse early (secondary endpoints). This will allow a cost-utility analysis to be conducted, exploring the impact of treatment withdrawal [22]. This carefully monitored patient group will allow us to determine how early sub-clinical relapse can be detected using standard biochemical and haematological measurements and novel biomarkers of complement activation or tissue injury. An embedded qualitative study of patients, both those who withdraw and decide not to withdraw, will explore attitudes towards treatment and its withdrawal.



1  
2  
3 **REFERENCES**  
4

- 5 1. Fremeaux-Bacchi V, Fakhouri F, Garnier A, et al. Genetics and outcome of atypical hemolytic uremic  
6 syndrome: a nationwide French series comparing children and adults. *Clin J Am Soc Nephrol* 2013,  
7 8(4):554-562.  
8  
9  
10 2. Noris M, Remuzzi G. Thrombotic microangiopathy after kidney transplantation. *Am J Transplant*  
11 2010;10(7):1517-1523.  
12  
13 3. Johnson S, Stojanovic J, Ariceta G, et al. An audit analysis of a guideline for the investigation and initial  
14 therapy of diarrhea negative (atypical) hemolytic uremic syndrome. *Pediatric nephrology (Berlin,*  
15 *Germany)* 2014;29(10):1967-1978.  
16  
17 4. Sheerin NS, Kavanagh D, Goodship TH, et al. A national specialized service in England for atypical  
18 haemolytic uraemic syndrome-the first year's experience. *QJM* 2016;109(1):27-33.  
19  
20 5. Le Quintrec M, Zuber J, Moulin B, et al. Complement genes strongly predict recurrence and graft  
21 outcome in adult renal transplant recipients with atypical hemolytic and uremic syndrome. *Am J*  
22 *Transplant* 2013;13(3):663-675.  
23  
24 6. Legendre CM, Licht C, Muus P, et al. Terminal complement inhibitor eculizumab in atypical hemolytic-  
25 uremic syndrome. *The New England journal of medicine* 2013;368(23):2169-2181.  
26  
27 7. Greenbaum LA, Fila M, Ardissino G, et al. Eculizumab is a safe and effective treatment in pediatric  
28 patients with atypical hemolytic uremic syndrome. *Kidney international* 2016;89(3):701-711.  
29  
30 8. Fakhouri F, Hourmant M, Campistol JM, et al. Terminal Complement Inhibitor Eculizumab in Adult  
31 Patients With Atypical Hemolytic Uremic Syndrome: A Single-Arm, Open-Label Trial. *Am J Kidney Dis*  
32 2016; 68(1):84-93.  
33  
34 9. Licht C, Greenbaum LA, Muus P, et al. Efficacy and safety of eculizumab in atypical hemolytic uremic  
35 syndrome from 2-year extensions of phase 2 studies. *Kidney international* 2015; 87(5):1061-1073.  
36  
37 10. European Medicines Agency: [http://www.ema.europa.eu/docs/en\\_GB/document\\_library/EPAR\\_-](http://www.ema.europa.eu/docs/en_GB/document_library/EPAR_-_Assessment_Report_-_Variation/human/000791/WC500119185.pdf)  
38 [Assessment\\_Report\\_-\\_Variation/human/000791/WC500119185.pdf](http://www.ema.europa.eu/docs/en_GB/document_library/EPAR_-_Assessment_Report_-_Variation/human/000791/WC500119185.pdf). 2011.  
39  
40 11. FDA:  
41 [http://www.fda.gov/AboutFDA/CentersOffices/OfficeofMedicalProductsandTobacco/CDER/ucm2730](http://www.fda.gov/AboutFDA/CentersOffices/OfficeofMedicalProductsandTobacco/CDER/ucm273089.htm)  
42 [89.htm](http://www.fda.gov/AboutFDA/CentersOffices/OfficeofMedicalProductsandTobacco/CDER/ucm273089.htm).  
43  
44 12. [https://www.nice.org.uk/guidance/hst1/resources/eculizumab-for-treating-atypical-haemolytic-](https://www.nice.org.uk/guidance/hst1/resources/eculizumab-for-treating-atypical-haemolytic-uraemic-syndrome-1394895848389)  
45 [uraemic-syndrome-1394895848389](https://www.nice.org.uk/guidance/hst1/resources/eculizumab-for-treating-atypical-haemolytic-uraemic-syndrome-1394895848389)  
46  
47 13. Struijk GH, Bouts AH, Rijkers GT, et al. Meningococcal sepsis complicating eculizumab treatment  
48 despite prior vaccination. *Am J Transplant* 2013;13(3):819-820.  
49  
50 14. McNamara LA, Topaz N, Wang X, et al. High Risk for Invasive Meningococcal Disease Among Patients  
51 Receiving Eculizumab (Soliris) Despite Receipt of Meningococcal Vaccine. *MMWR Morb Mortal Wkly*  
52 *Rep* 2017;66(27):734-737.  
53  
54  
55  
56  
57  
58  
59  
60



- 1  
2  
3  
4  
5  
6  
7  
8  
9  
10  
11  
12  
13  
14  
15  
16  
17  
18  
19  
20  
21  
22  
23  
24  
25  
26  
27  
28  
29  
30  
31  
32  
33  
34  
35  
36  
37  
38  
39  
40  
41  
42  
43  
44  
45  
46  
47  
48  
49  
50  
51  
52  
53  
54  
55  
56  
57  
58  
59  
60
15. Carr R, Cataland SR. Relapse of aHUS after discontinuation of therapy with eculizumab in a patient with aHUS and factor H mutation. *Annals of hematology* 2013;92(6):845-846.
  16. Ardissino G, Testa S, Possenti I, et al. Discontinuation of eculizumab maintenance treatment for atypical hemolytic uremic syndrome: a report of 10 cases. *Am J Kidney Dis* 2014;64(4):633-637.
  17. Wijnsma KL, Duineveld C, Volokhina EB, et al. Safety and effectiveness of restrictive eculizumab treatment in atypical haemolytic uremic syndrome. *Nephrol Dial Transplant* 2018;33(4):635-645.
  18. Fakhouri F, Fila M, Hummel A, et al. Eculizumab discontinuation in children and adults with atypical haemolytic uremic syndrome: a prospective multicentric study. *Blood* 2020.
  19. Johnson VE, Cook JD: Bayesian design of single-arm phase II clinical trials with continuous monitoring. *Clin Trials* 2009; 6(3):217-226.
  20. [https://biostatistics.mdanderson.org/SoftwareDownload/SoftwareFiles/BayesFactorBinary/UsersGuide\\_BayesFactorBinary.pdf](https://biostatistics.mdanderson.org/SoftwareDownload/SoftwareFiles/BayesFactorBinary/UsersGuide_BayesFactorBinary.pdf)
  21. Glaser BG. The Constant Comparative Method of Qualitative Analysis. *Social Problems* 1965;12(4):436-45.
  22. Drummond MF, O'Brien B, Stoddart GL, et al. Basic Types of Economic Evaluation. In: *Methods for economic evaluation of health care programmes*. edn. Oxford University Press; 2005.

## Acknowledgements

The authors would like to thank Dr Colin Muirhead who was responsible for the statistical proposal in the initial grant application.

The authors would also like to thank all the Principal Investigators for their contribution and support, the research nurses, the members of the TSC and DMC and all the patients involved in the SETS aHUS Trial.

## Contributors

Professor Neil Sheerin is the Chief Investigator and senior author of the SETS aHUS design and has led on grant acquisition and protocol development. Professor David Kavanagh, Dr Sally Johnson, Dr Ewin Kwan Soon Wong, Mr Len Woodward, Ms Jan Lecouturier, Dr Thomas Chadwick, and Dr Yemi Oluboyede are co-applicants of the grant and contributed to the design of the trial and protocol development. Dr Sonya Carnell and Ms Sarah Dunn are part of the trial management team and contributed to protocol development. Mr Eoin Moloney is a Health Economist and contributed to protocol development. Mr Andy Bryant is a research statistician and contributed to protocol development. Mr Christopher Weetman is a data manager and contributed to protocol development. Dr Michal Malina and Dr Victoria Brocklebank are part of the National Renal Complement Therapeutics Centre and have played key roles in the running of the SETS aHUS trial.

This paper was drafted from the current approved version of the protocol by the corresponding author SD; all contributing authors commented and amended drafts of the paper. All contributing authors read and approved the final manuscript.

## Funding

The SETS aHUS Trial is funded by the National Institute for Health Research (NIHR) Health Technology Assessment (HTA) Programme (project number 15/130/94). The views expressed are those of the authors and not necessarily those of the NIHR or the Department of Health and Social Care.

## Conflict of interests

SB has received honoraria for sitting on advisory boards for Alexion and Novartis. DK is a director of and scientific advisor to Gyroscope Therapeutics. DK received advisory board payments from Idorsia, Novartis, ChemoCentryx, Alexion, Apellis, Biomarin and Sarepta. DK's spouse works for GSK. MM has received honoraria for educational talks and honorarium for national lead of aHUS registry, both from Alexion and travel expenses from Alexion. EKSJ has received honoraria for lectures and/or advisory boards for Alexion Pharmaceutical, Biocryst and Novartis. LW has received expenses, honoraria and fees for advisory board participation and talks from Alexion and Roche. NS has given lectures or sat on advisory boards for Alexion Pharmaceutical, Roche, Astra Zeneca and Novartis, no personal honoraria, all payments made to the department.

## Patient and public involvement

1 Patients and/or the public were involved in the design, or conduct, or reporting, or dissemination plans of this  
2 research. Refer to the Methods section for further details.  
3  
4  
5

### 6 **Patient consent for publication**

7  
8 Not required.  
9

### 10 11 **Provenance and peer review**

12 Not commissioned; externally peer reviewed during funding application process.  
13  
14  
15

### 16 17 **Figure Legends**

18  
19 Figure 1. Data Collection Time Points for Withdrawal cohort  
20

21 Figure 2. Data Collection Time Points for Health Economics Cohort  
22

23 Figure 3. Criteria for diagnosis of aHUS relapse  
24

25  
26 Figure 4. Haematological remission definition and maintenance  
27  
28  
29  
30  
31  
32  
33  
34  
35  
36  
37  
38  
39  
40  
41  
42  
43  
44  
45  
46  
47  
48  
49  
50  
51  
52  
53  
54  
55  
56  
57  
58  
59  
60

|                                             | Central Pre-Screen | Site Screen and Consent | Final Infusion | Withdrawal Phase |   |   |   |   |   |   |   |    |    |    |    |    |    |    |    |    |    |    |    |    |    |    |    |    |    |    |    |    |    |    | Unscheduled Visit |    |    |    |    |   |
|---------------------------------------------|--------------------|-------------------------|----------------|------------------|---|---|---|---|---|---|---|----|----|----|----|----|----|----|----|----|----|----|----|----|----|----|----|----|----|----|----|----|----|----|-------------------|----|----|----|----|---|
| Month                                       | 0                  | 0                       | 0              | 1                |   |   | 2 |   |   | 3 |   |    | 4  |    |    | 5  |    |    | 6  |    |    | 7  | 8  | 9  | 10 | 11 | 12 | 13 | 14 | 15 | 16 | 17 | 18 | 19 | 20                | 21 | 22 | 23 | 24 |   |
| Visit Number                                | N/A                | N/A                     | 1              | 2                | 3 | 4 | 5 | 6 | 7 | 8 | 9 | 10 | 11 | 12 | 13 | 14 | 15 | 16 | 17 | 18 | 19 | 20 | 21 | 22 | 23 | 24 | 25 | 26 | 27 | 28 | 29 | 30 | 31 | 32 | 33                | 34 |    |    |    |   |
| Genetic Eligibility                         | X                  |                         |                |                  |   |   |   |   |   |   |   |    |    |    |    |    |    |    |    |    |    |    |    |    |    |    |    |    |    |    |    |    |    |    |                   |    |    |    |    |   |
| Medical History Review                      |                    | X                       |                |                  |   |   |   |   |   |   |   |    |    |    |    |    |    |    |    |    |    |    |    |    |    |    |    |    |    |    |    |    |    |    |                   |    |    |    |    |   |
| Informed consent                            |                    | X                       |                |                  |   |   |   |   |   |   |   |    |    |    |    |    |    |    |    |    |    |    |    |    |    |    |    |    |    |    |    |    |    |    |                   |    |    |    |    |   |
| Eligibility Checklist Completion            |                    | X                       |                |                  |   |   |   |   |   |   |   |    |    |    |    |    |    |    |    |    |    |    |    |    |    |    |    |    |    |    |    |    |    |    |                   |    |    |    |    |   |
| Physical Examination                        |                    | X                       |                |                  |   |   |   |   |   |   |   |    |    |    |    |    |    |    |    |    |    |    |    |    |    |    |    |    |    |    |    |    |    |    |                   |    | X  | X  |    |   |
| Height & Weight                             |                    | X                       |                |                  |   |   |   |   |   |   |   |    |    |    |    |    |    |    |    |    |    |    |    |    |    |    |    |    |    |    |    |    |    |    |                   |    |    |    |    |   |
| Pregnancy test                              |                    | X                       |                |                  |   |   |   |   |   |   |   |    |    |    |    |    |    |    |    |    |    |    |    |    |    |    |    |    |    |    |    |    |    |    |                   |    |    |    |    |   |
| Eculizumab infusion                         |                    |                         | X              |                  |   |   |   |   |   |   |   |    |    |    |    |    |    |    |    |    |    |    |    |    |    |    |    |    |    |    |    |    |    |    |                   |    |    |    |    |   |
| meningococcal prophylaxis                   |                    |                         | X              | X                |   |   |   |   |   |   |   |    |    |    |    |    |    |    |    |    |    |    |    |    |    |    |    |    |    |    |    |    |    |    |                   |    |    |    |    |   |
| urine analysis training                     |                    |                         |                | X                |   |   |   |   |   |   |   |    |    |    |    |    |    |    |    |    |    |    |    |    |    |    |    |    |    |    |    |    |    |    |                   |    |    |    |    |   |
| Vital Signs                                 |                    | X                       |                | X                | X | X | X | X | X | X | X | X  | X  | X  | X  | X  | X  | X  | X  | X  | X  | X  | X  | X  | X  | X  | X  | X  | X  | X  | X  | X  | X  | X  | X                 | X  | X  | X  | X  | X |
| Concomitant medication Review               |                    | X                       |                | X                | X | X | X | X | X | X | X | X  | X  | X  | X  | X  | X  | X  | X  | X  | X  | X  | X  | X  | X  | X  | X  | X  | X  | X  | X  | X  | X  | X  | X                 | X  | X  | X  | X  | X |
| Renal Function (Creatinine & GFR)           |                    | X                       |                | X                | X | X | X | X | X | X | X | X  | X  | X  | X  | X  | X  | X  | X  | X  | X  | X  | X  | X  | X  | X  | X  | X  | X  | X  | X  | X  | X  | X  | X                 | X  | X  | X  | X  | X |
| Liver Function Tests                        |                    | X                       |                | X                | X | X | X | X | X | X | X | X  | X  | X  | X  | X  | X  | X  | X  | X  | X  | X  | X  | X  | X  | X  | X  | X  | X  | X  | X  | X  | X  | X  | X                 | X  | X  | X  | X  | X |
| Haemolysis markers (full blood count & LDH) |                    | X                       |                | X                | X | X | X | X | X | X | X | X  | X  | X  | X  | X  | X  | X  | X  | X  | X  | X  | X  | X  | X  | X  | X  | X  | X  | X  | X  | X  | X  | X  | X                 | X  | X  | X  | X  | X |
| Electrolyte profile (U&Es)                  |                    | X                       |                | X                | X | X | X | X | X | X | X | X  | X  | X  | X  | X  | X  | X  | X  | X  | X  | X  | X  | X  | X  | X  | X  | X  | X  | X  | X  | X  | X  | X  | X                 | X  | X  | X  | X  | X |
| Haptoglobin & Blood film                    |                    | X                       |                | X                |   |   | X |   |   |   | X |    |    |    |    |    | X  |    |    |    |    |    |    |    |    |    |    |    |    |    |    |    |    |    |                   |    | X  | X  |    |   |
| Urine PCR                                   |                    | X                       |                | X                |   |   | X |   |   |   | X |    |    |    |    |    | X  |    |    |    |    |    |    |    |    |    |    |    |    |    |    |    |    |    |                   |    | X  | X  |    |   |
| Biomarkers and complement                   |                    | X                       |                | X                | X | X | X | X | X | X | X | X  | X  | X  | X  | X  | X  | X  | X  | X  | X  | X  | X  | X  | X  | X  | X  | X  | X  | X  | X  | X  | X  | X  | X                 | X  | X  | X  | X  |   |



1  
2  
3  
4  
5  
6  
7  
8  
9  
10  
11  
12  
13  
14  
15  
16  
17  
18  
19  
20  
21  
22  
23  
24  
25  
26  
27  
28  
29  
30  
31  
32  
33  
34  
35  
36  
37  
38  
39  
40  
41  
42  
43  
44  
45  
46

For peer review only

| Follow - up                           |   |   |   |   |   |   |    |   |
|---------------------------------------|---|---|---|---|---|---|----|---|
| month                                 | 1 |   | 3 |   | 6 |   | 24 |   |
| visit number                          | 1 | 2 | 3 | 4 | 5 | 6 | 7  | 8 |
| Medical History Review                | X |   |   |   |   |   |    |   |
| Informed consent                      | X |   |   |   |   |   |    |   |
| Eligibility Checklist                 | X |   |   |   |   |   |    |   |
| EQ5D & SF36                           | X | X | X | X | X | X | X  | X |
| Health care Utilisation questionnaire | X | X | X | X | X | X | X  | X |
| Time & Travel Questionnaire           |   |   |   |   |   |   | X  |   |







**SETS aHUS: Stopping Eculizumab Treatment Safely in aHUS**  
**Participant Information Sheet (aged 16+)**  
**Version 3.0, 08.02.19**

**Invitation**

You are being invited to take part in a research study. Please read the following information to help you decide if you want to take part. We would like you to understand why we are doing this research and what it means for you. You do not need to make a decision straight away, so please feel free to talk to others about the study if you wish. Please ask us if there is anything that is not clear or if you want to know more.

Please remember that you do not have to take part and your normal healthcare will not be affected in any way, whatever you decide.

**Part 1**

**What is the purpose of this study?**

***Atypical Haemolytic Uraemic Syndrome*** (aHUS) is a rare disease. When aHUS occurs the cells that line the blood vessels are damaged and are no longer able to stop blood from clotting. Blood clots form in small vessels, particularly in the kidney, leading to problems with kidney function. Most cases are due to abnormalities in a part of the immune system called the complement system. These abnormalities lead to excessive activation of the complement system, which is responsible for the cell damage and blood clots.

***Current standard treatment*** for aHUS involves a long-term intravenous injection of a drug called Eculizumab every 2 weeks. Eculizumab blocks the body's complement system and its ability to damage its own vulnerable cells.

Research has shown that Eculizumab is effective in the treatment of aHUS, but the recommendation that Eculizumab treatment should be lifelong is not based on strong evidence and may not be necessary for many patients.

This study hopes to provide evidence for an alternative strategy for treatment of aHUS based on monitoring and treatment re-introduction rather than continuous Eculizumab treatment.

***Overall aim: To establish an alternative and safe treatment strategy for patients with aHUS that includes withdrawal of Eculizumab treatment.***

**Thank you for reading so far – if you are still interested, please read the rest of this leaflet which gives more detailed information about the trial and what will happen if you decide to take part.**

## **Why have I been chosen to take part?**

You have been asked to take part in the study because you have Atypical Haemolytic Uraemic Syndrome and are currently receiving Eculizumab treatment. We are hoping to recruit 30 patients to the withdrawal study and an additional 20 patients who will remain on Eculizumab and complete a series of questionnaires only.

## **What would taking part involve?**

Taking part would involve stopping your Eculizumab treatment and attending 34 safety monitoring visits at hospital over the course of 24 months during which we will assess that you are safe to continue to remain off medication. If you currently receive your treatment at home you would need to be willing to attend the hospital to complete the safety visits. You will be required to test your urine at home and document the results daily (for the first month), and then three times per week for the remaining 23 months, in a patient diary provided to you by the study team. You will also complete questionnaires on 8 occasions relating to quality of life and measure use of NHS resources and your own out of pocket expenses related to health care.

If you do not want to stop your Eculizumab treatment but still want to participate you can also complete study questionnaires that relate to your quality of life, and measure use of NHS resources and your own out of pocket expenses related to health care. You would only be asked to complete these on 8 occasions over the 24-month period.

There is also a linked interview study that you can take part in whether you decide to withdraw from treatment or continue with Eculizumab treatment. If you would like to receive information about this study you can consent to have your contact details passed to the research team for them to contact you about this.

## **What are the possible benefits of taking part?**

It might mean that you will no longer need to take the Eculizumab treatment and face any potential risks or side effects associated with treatment. Patients are about a thousand times more likely to develop a serious, potentially life threatening infection with meningococcus, a bug that causes meningitis or sepsis. Vaccination, and even antibiotics, do not give complete protection from this. Other serious problems have also been reported in patients taking Eculizumab but we cannot be certain that Eculizumab was the cause of these problems.

Being in the study will mean that you will no longer need bi-weekly infusions and will not have to continue taking additional antibiotics to prevent infection. However, it is possible that you could need to restart and continue to receive Eculizumab treatment if a relapse was to occur.

[Trust Headed Paper]

## What are the possible risks of taking part?

The withdrawal of Eculizumab treatment could lead to a relapse of atypical HUS and relapse associated complications. When a relapse is diagnosed, your Eculizumab treatment will be restarted within 24 hours of presentation. It is essential that you present to a hospital with your patient card as soon as you begin to feel unwell or the home urine test shows an increase in the level of blood. This is to ensure that the Eculizumab is re-started as soon as possible to reduce the likelihood of kidney damage and associated complications. If your treatment is re-started, you will receive your first infusion in the hospital. You will also have the antibiotics restarted to protect you from infection. If you need to be put back on to Eculizumab treatment you can decide to receive your infusions in hospital or at home. This can be arranged with your clinical team if you relapse while in the study.

If a relapse occurs this could lead to:

- A drop in kidney function
- Other problems related to the disease which can affect organs such as the pancreas or nervous system

The evidence that is available at the moment suggests that if Eculizumab is reintroduced quickly these problems can be avoided. This is not proven, and this study will test whether this is true.

If, during the trial, you decide to travel outside of the country, we ask that you only travel to countries where Eculizumab is available, so treatment can be re-started immediately as required. You **MUST** first inform your hospital to check whether Eculizumab is available in the country that you plan to travel to and inform them of the dates that you will be outside of the country. While the cost of the Eculizumab will be covered by NHS England you must ensure that you have appropriate travel insurance and inform your insurance company that you are taking part in the trial. This is to ensure that all other treatment costs and hospital stays abroad are covered by your own insurance should you relapse. We have developed a travel guide to be followed should you decide to travel outside of the country while you are participating in the withdrawal study.

To minimise the risks of taking part in the study, we will only include you in the study if you:

- Have been on Eculizumab treatment for at least 6 months;
- Are in remission;
- Have a stable kidney function;
- Are willing to attend for safety monitoring assessments;
- Are willing to travel only to countries that can supply Eculizumab (to be confirmed with co-ordinating centre prior to travel);
- Are able to perform and record self-monitoring urinalysis.

Sexually active females of child bearing age must:

- Have a negative pregnancy test at screening and be using an effective contraception for the duration of the study (please ask your doctor/nurse).

OR

- fulfil one of the following criteria:
  - Be post-menopausal
  - Have undergone surgical sterilisation

You will not be able to take part if you:

- have lost a previous transplant kidney to recurrent aHUS;
- Are currently or are planning pregnancy;
- Are unable to comply with safety monitoring assessments;
- Are currently participating in another clinical trial (not including participation in aHUS registries)

### **What will happen to me if I take part?**

**If you consent to withdraw from Eculizumab Treatment, you will complete the following visits:**

#### **Screening Visit**

You will be asked to attend a screening visit at the hospital or clinic where you usually receive your Eculizumab treatment or if you receive your treatment at home, you will be asked to attend the hospital where your clinician is based. If you decide to take part you will complete a consent form. You will be given a unique patient ID number that will be written on your consent form and all questionnaires and samples that you provide in the study. This ID number will only be linked to you at your hospital and so nobody outside of your direct clinical care team will know that the information and samples belong to you.

If you are a female of child bearing age you will be required to have a pregnancy test at the screening visit after you have signed the consent form. You will receive your last Eculizumab infusion at the screening visit. Please be aware that you will continue to take your meningococcal prophylaxis for 4 weeks following this last Eculizumab infusion.

We will also collect information from your medical notes about your medical history after you have signed the consent form.

#### **Baseline Visit**

Your baseline visit will be 2 weeks (+/-2 days) after your screening visit on the day that you would usually receive your next dose of Eculizumab. You will not receive the infusion but will

[Trust Headed Paper]

attend your usual hospital or clinic to have your blood pressure and temperature checked. You will also have a blood and urine test and complete questionnaires about your health.

### **Study Visits**

You will be reviewed at the hospital weekly for the first month, then alternate weeks until month 6, then monthly thereafter until the end of the study period (month 24).

At each study visit you will have a blood and urine test and answer questions about how your health has been since your last visit.

You will also be required to complete questionnaires at your hospital visits twice in month 1, and once in the following months, 3, 6, 9, 12, 18 & 24. These will ask about your health, quality of life, medications and about use of NHS services and your out of pocket expenses relating to health care. It should take between 20 and 30 minutes to complete these questionnaires each time.

Overall you will be attending 34 visits over the 24 month period which includes the screening and baseline visit. You will not be required to attend more visits than you would usually if you were to stay on your current treatment. If you currently receive your Eculizumab infusions at home you will need to come in to the hospital for the study visits as these cannot be carried out at your home.

You will be required to carry out urine tests at home and to document this in a patient diary. You will be given a 30-minute training session during your baseline visit that will explain everything that you will need to do to carry this out at home.

You will also be given a small card to carry which will include information on the trial. If you attend **ANY** hospital or clinic for treatment outside of your scheduled follow-up visits you **MUST** give the doctor this card so that they are able to contact the trial team.

### **If you continue with your Eculizumab treatment and consent to completing the questionnaires only;**

You will receive the questionnaires by post on 8 occasions over the 24-month period. This should take you around 20-30 minutes to complete. You will be required to post the completed questionnaires back to the research team at Newcastle University using the pre-paid envelope supplied. The questionnaires will not contain any identifiable information relating to you as your unique patient ID will be written on the questionnaires when you receive them.

### **Will participating in research affect my treatment?**

If you decide to take part in the withdrawal component of the trial then you will no longer receive your Eculizumab treatment. If you decide to take part in the questionnaire part of the trial only, your Eculizumab treatment will remain the same.



## **What will happen if I don't want to carry on with the study?**

You may withdraw from the study at any time without giving a reason. If you decide to go back on to Eculizumab treatment we would like you to continue to be followed up by the study team. You may wish to withdraw completely from the study and further follow up and so we would not collect any further information about you to be used in the study. However, we would like to use the information and blood samples previously provided. If you decide that you don't want any of the information or blood samples already provided to be used in the study please contact a member of the study team so it can be removed from analysis.

## **Will I be paid for taking part?**

If you receive re-imburement for travel to clinics this will continue. If you currently receive your Eculizumab treatment at home, you may qualify to be reimbursed for travel to clinics for your follow up visits. Your doctor can give you more information about this. You will not be paid for taking part in this study.

## **Part 2**

## **Will my GP be told about my involvement in this study?**

If you decide to take part in this study and consent to have your GP informed, then we will inform your GP. Your participation in the study will also be noted in your medical records.

## **Will my taking part in research be kept confidential?**

All of the data we collect will be kept strictly confidential and in accordance with the General Data Protection Regulation (GDPR).

The Newcastle Upon Tyne Hospitals NHS Foundation Trust (NUTH) is the sponsor for this study based in the United Kingdom and will act as the "data controller" for this study. **They are responsible for looking after your information and using it properly.** This study is managed on behalf of the sponsor by the Newcastle Clinical Trials Unit (NCTU) who will act as the "data processor". As data processor, NCTU are responsible for processing personal data on behalf of the data controller. The Newcastle Clinical Trials Unit based at Newcastle University would like to receive a copy of your consent form for safety purposes. This will be destroyed once it has been reviewed. No other identifiable information will be received by the Newcastle Clinical Trials Unit

Your rights to access, change or move your information are limited, as we need to manage your information in specific ways in order for the research to be reliable and accurate. If you withdraw from the study, we will keep the information about you that we have already

[Trust Headed Paper]

obtained. To safeguard your rights, we will use the minimum personally-identifiable information possible.

You can find out more about how we use your information at [www.newcastle-hospitals.org.uk/about-us/freedom-of-information\\_how-we-use-information.aspx](http://www.newcastle-hospitals.org.uk/about-us/freedom-of-information_how-we-use-information.aspx)

To find out more information about research and general use of patient information please refer to the Health Research Authority Website at [www.hra.nhs.uk/information-about-patients](http://www.hra.nhs.uk/information-about-patients)

The local study team at [NHS site] will use your name, [NHS number/CHI number] and contacts details to contact you about the research study, and make sure that relevant information about the study is recorded for your care, and to oversee the quality of the study. Individuals from the sponsor, Newcastle Clinical Trials Unit and regulatory organisations may look at your medical and research records to check the accuracy of the research study. The local study team will pass these details to the sponsor or the Newcastle Clinical Trials Unit along with information collected from you and/or your medical records. The only people at sponsor or the Newcastle Clinical Trials Unit who will have access to information that identifies you will be people who need to audit the data collection process. The people who analyse the information will not be able to identify you and will not be able to find out your name, [NHS number/CHI number] or contact details.

The local study team at [NHS site] will keep identifiable information about you from this study for 5 years after the study has finished.

When you agree to take part in a research study, the information about your health and care may be provided to researchers running other research studies in this organisation and in other organisations. These organisations may be universities, NHS organisations or companies involved in health and care research in this country or abroad. Your information will only be used by organisations and researchers to conduct research in accordance with the UK Policy Framework for Health and Social Care Research and will not contain any personal identifiable information such as your name, [NHS number/CHI number] or contact details.

This information will not identify you and will not be combined with other information in a way that could identify you. The information will only be used for the purpose of health and care research and cannot be used to contact you or to affect your care. It will not be used to make decisions about future services available to you, such as insurance.

The blood samples that you provide will be sent to Newcastle University to be analysed and will have your unique ID number on them but no personal identifiable information attached. Once the study is finished, these samples will be stored at the Newcastle University biobank and may be used in future aHUS research. Please let us know if you do not want your samples used in future research.



## **What will happen to the results of the research study?**

Whenever possible we will publish the results of our studies in scientific journals. We also plan to present data at scientific conferences. You will not be named in any publication or presentation of the study results. We would also like to send you a newsletter with a summary of our results. Please let the research team know if you want to receive the newsletter. Results will also be available at the end of the study on the atypical HUS website which can be found at the following web address:

<http://www.atypicalhus.co.uk/>

## **Who is organising and funding the research?**

This study is funded by the National Institute for Health Research (NIHR). The study is sponsored and indemnified by the Newcastle Upon Tyne NHS Foundation Trust and indemnified by Newcastle University. The Newcastle Clinical Trials Unit is managing the study.

## **Who has reviewed the study?**

All research in the NHS is looked at by an independent group of people called a NHS Research Ethics Committee (REC). This is to protect your interests. This study has been reviewed and given a favourable opinion by the North East – Tyne & Wear South Research Ethics Committee and has been approved by the NHS Health Research Authority (HRA). The study has also been given approval by the Medicines and Healthcare products Regulatory Agency (MHRA).

## **What if relevant new information becomes available?**

The study team will ensure that you are receiving the most appropriate and up to date medical care that you require.

## **What if something goes wrong?**

If you have a concern about any aspect of the study please contact your local doctor (see contact details below). Alternatively, you can contact one of the researchers running this study and discuss your concerns.

### **Your local contact people for the study are:**

#### Contact Details of local PI:

Name:  
Address:  
Phone:  
Email:

#### Contact details of local Research Nurse:

Name:  
Address:  
Phone:  
Email:

**The Newcastle Trial Team contact is:**

Contact Details of Trial Manager:  
Name: Sarah Dunn  
Address: 1-2 Claremont Terrace,  
NCTU, Newcastle University, NE2 4AE  
Phone: 0191 208 2521  
Email: sarah.dunn2@ncl.ac.uk

If you are still unhappy and wish to complain formally and confidentially you can do this through the NHS complaints procedure by speaking to a member of the PALS (Patient Advise and Liaison Service) on 0800 0320 202 or by visiting [www.PALS.nhs.uk](http://www.PALS.nhs.uk).

In the event that something goes wrong and you are harmed during the research due to someone's negligence, then you may have grounds for a legal action for compensation against Newcastle upon-Tyne Hospitals NHS Foundation Trust but you may have to pay your legal costs.

**How have patients and the public been involved in this study?**

Our patient representative group has helped to design the study and study documents.

The group will meet when the trial is near completion to have input into the interpretation of the results. Their views of withdrawal and the safety results from the study will be considered. This will inform the publication of results. The groups views on the dissemination of results will also be considered.

**Thank you for taking time to read this information sheet**

# SETS aHUS: Stopping Eculizumab Treatment Safely in aHUS

The holder of this card has a rare disease known as atypical Haemolytic Uraemic Syndrome and is taking part in a clinical trial to assess the safe withdrawal of Eculizumab treatment. Because of this, the holder of this card may suffer a **relapse**.

If the holder presents unwell, however minor the illness, please evaluate immediately and obtain the following Laboratory investigations as their Eculizumab treatment and prophylactic antibiotics may need to be re-started as soon as possible and **within 24hrs**:

• U&E • FBC • LDH

If the results are abnormal, **immediately** contact the local medical team and refer to the UK National aHUS Service website for advice. Contact details on reverse side.

# SETS aHUS: Stopping Eculizumab Treatment Safely in aHUS



**Patients Local Medical team: +44 (0).....**

**UK National aHUS Service: +44 (0)191 2820385**  
(from 9am to 5pm GMT)

**Outside of these hours, please contact the Newcastle Hospitals  
Switchboard and request to speak to the clinician on call for the  
aHUS Service on +44 (0)191 233 6161**

**[www.atypicalhus.co.uk](http://www.atypicalhus.co.uk)**

|                                               |                                                                                                                                                                                                                                                                                                                                                                                                                                                                                                                                                                                                                                                                                                                                                                                                                  |
|-----------------------------------------------|------------------------------------------------------------------------------------------------------------------------------------------------------------------------------------------------------------------------------------------------------------------------------------------------------------------------------------------------------------------------------------------------------------------------------------------------------------------------------------------------------------------------------------------------------------------------------------------------------------------------------------------------------------------------------------------------------------------------------------------------------------------------------------------------------------------|
| Primary registry and trial identifying number | ISRCTN<br>ISRCTN17503205                                                                                                                                                                                                                                                                                                                                                                                                                                                                                                                                                                                                                                                                                                                                                                                         |
| Date of registration in primary registry      | 20 April 2018                                                                                                                                                                                                                                                                                                                                                                                                                                                                                                                                                                                                                                                                                                                                                                                                    |
| Secondary identifying numbers                 | EudraCT: 2017-003916-37                                                                                                                                                                                                                                                                                                                                                                                                                                                                                                                                                                                                                                                                                                                                                                                          |
| Source(s) of monetary or material support     | NIHR HTA                                                                                                                                                                                                                                                                                                                                                                                                                                                                                                                                                                                                                                                                                                                                                                                                         |
| Primary sponsor                               | Newcastle Upon Tyne Hospitals NHS FT – Christopher Price<br><a href="mailto:christoper.price6@nhs.uk">christoper.price6@nhs.uk</a>                                                                                                                                                                                                                                                                                                                                                                                                                                                                                                                                                                                                                                                                               |
| Secondary sponsor(s)                          | N/A                                                                                                                                                                                                                                                                                                                                                                                                                                                                                                                                                                                                                                                                                                                                                                                                              |
| Contact for public queries                    | Trial Manager – Sarah Dunn <a href="mailto:sarah.dunn2@newcastle.ac.uk">sarah.dunn2@newcastle.ac.uk</a>                                                                                                                                                                                                                                                                                                                                                                                                                                                                                                                                                                                                                                                                                                          |
| Contact for scientific queries                | Chief Investigator – Professor Neil Sheerin <a href="mailto:neil.sheerin@newcastle.ac.uk">neil.sheerin@newcastle.ac.uk</a>                                                                                                                                                                                                                                                                                                                                                                                                                                                                                                                                                                                                                                                                                       |
| Public title                                  | Stopping Eculizumab Treatment Safely in aHUS (SETS aHUS)                                                                                                                                                                                                                                                                                                                                                                                                                                                                                                                                                                                                                                                                                                                                                         |
| Scientific title                              | Multicentre, open label, prospective, single arm study of safety impact of Eculizumab withdrawal                                                                                                                                                                                                                                                                                                                                                                                                                                                                                                                                                                                                                                                                                                                 |
| Countries of recruitment                      | England and Scotland                                                                                                                                                                                                                                                                                                                                                                                                                                                                                                                                                                                                                                                                                                                                                                                             |
| Health condition(s) or problem(s) studied     | atypical Haemolytic Uraemic Syndrome                                                                                                                                                                                                                                                                                                                                                                                                                                                                                                                                                                                                                                                                                                                                                                             |
| Intervention(s)                               | Withdrawal of Eculizumab                                                                                                                                                                                                                                                                                                                                                                                                                                                                                                                                                                                                                                                                                                                                                                                         |
| Key inclusion and exclusion criteria          | <p>Key inclusion criteria:</p> <ul style="list-style-type: none"> <li>• Age <math>\geq 2+</math> years of age,</li> <li>• On Eculizumab treatment for at least 6 months,</li> <li>• In remission with no evidence of ongoing microangiopathic haemolytic anaemia (MAHA) activity at screening defined by: <ul style="list-style-type: none"> <li>- Platelet count &gt; lower limit of normal as determined by local reference range,</li> <li>- Lactate Dehydrogenase (LDH) &lt;x2 upper limit of normal as determined by local lab reference ranges,</li> </ul> </li> <li>• Normal renal function or Chronic Kidney Disease (CKD) stages 1-3,</li> <li>• Absence of decline of renal function confirmed by review of available assessments of renal function for the preceding 6 months by the Chief</li> </ul> |

|                         |                                                                                                                                                                                                                                                                                                                                                                                                                                                                                                                                                                                                                                                                                                                                                                                                                                                                                                                                                                                                                                                                                                                                                                                                                                                                                                                                                                                                                                          |
|-------------------------|------------------------------------------------------------------------------------------------------------------------------------------------------------------------------------------------------------------------------------------------------------------------------------------------------------------------------------------------------------------------------------------------------------------------------------------------------------------------------------------------------------------------------------------------------------------------------------------------------------------------------------------------------------------------------------------------------------------------------------------------------------------------------------------------------------------------------------------------------------------------------------------------------------------------------------------------------------------------------------------------------------------------------------------------------------------------------------------------------------------------------------------------------------------------------------------------------------------------------------------------------------------------------------------------------------------------------------------------------------------------------------------------------------------------------------------|
|                         | <p>Investigator (CI) and clinical members of the Trial Management Group (TMG).</p> <p>Key Exclusion Criteria:</p> <ul style="list-style-type: none"> <li>• Severe non-renal disease manifestations at initial presentation with aHUS, which in the opinion of the Chief Investigator and/or the clinical members of the TMG makes the risk of treatment withdrawal unacceptable,</li> <li>• Current or planned pregnancy within the study duration,</li> <li>• Unable to give informed consent or assent, or unable to obtain parent/guardian consent if under 16 years of age,</li> <li>• Current participation in another clinical trial (not including participation in aHUS registries),</li> <li>• Severe, uncontrolled hypertension (systolic blood pressure &gt;160 mmHg) that is likely to induce at TMA.</li> </ul>                                                                                                                                                                                                                                                                                                                                                                                                                                                                                                                                                                                                             |
| Study type              | <p>Allocation: non-randomized</p> <p>Masking: open label</p> <p>Primary purpose: Safety</p> <p>Phase IIb</p>                                                                                                                                                                                                                                                                                                                                                                                                                                                                                                                                                                                                                                                                                                                                                                                                                                                                                                                                                                                                                                                                                                                                                                                                                                                                                                                             |
| Date of first enrolment | November 2018                                                                                                                                                                                                                                                                                                                                                                                                                                                                                                                                                                                                                                                                                                                                                                                                                                                                                                                                                                                                                                                                                                                                                                                                                                                                                                                                                                                                                            |
| Target sample size      | 50: 30 withdrawal and 20 non-withdrawal                                                                                                                                                                                                                                                                                                                                                                                                                                                                                                                                                                                                                                                                                                                                                                                                                                                                                                                                                                                                                                                                                                                                                                                                                                                                                                                                                                                                  |
| Recruitment status      | Recruiting                                                                                                                                                                                                                                                                                                                                                                                                                                                                                                                                                                                                                                                                                                                                                                                                                                                                                                                                                                                                                                                                                                                                                                                                                                                                                                                                                                                                                               |
| Primary outcome(s)      | To determine the safety of Eculizumab withdrawal in patients with aHUS                                                                                                                                                                                                                                                                                                                                                                                                                                                                                                                                                                                                                                                                                                                                                                                                                                                                                                                                                                                                                                                                                                                                                                                                                                                                                                                                                                   |
| Key secondary outcomes  | <p>1. The effectiveness of a monitoring protocol to detect disease relapse following withdrawal of Eculizumab assessed by:</p> <p>1.1. The proportion of patients who relapse and restart Eculizumab without the development of a TMA-related SAE</p> <p>1.2. The time from the first clinical feature (symptom, positive urinalysis or laboratory result) of a relapse of TMA and the re-introduction of Eculizumab</p> <p>This outcome is ongoing and not measured at any particular timepoint</p> <p>2. The relapse rate after withdrawal of Eculizumab as determined by the proportion of patients who relapse after Eculizumab is withdrawn. This outcome is ongoing and not measured at any particular time point. A patient could relapse at any point in the 2 years participation period.</p> <p>3. The proportion of patients, currently on long-term treatment with Eculizumab, who can be maintained off treatment. This outcome is measured at the end of the trial when all relapse data is collected. A patient could relapse at any point in the 2 years participation period.</p> <p>4. The period from withdrawal to relapse in those patients who restart treatment. This outcome is measured at the end of the trial when all relapse data is collected.</p> <p>5. The change in estimated GFR as calculated by the CKD-EPI or modified Schwartz equations over the course of the study from baseline (day 0) to</p> |

|  |                                                                                                                                                                                                                                                                                                                                                                                                                                                                                                                                                                                                                                                                                                                                                                                                                                                                                                                                                                                                                                                                                                                                                                                                                                                                                                                                                                                                                                                       |
|--|-------------------------------------------------------------------------------------------------------------------------------------------------------------------------------------------------------------------------------------------------------------------------------------------------------------------------------------------------------------------------------------------------------------------------------------------------------------------------------------------------------------------------------------------------------------------------------------------------------------------------------------------------------------------------------------------------------------------------------------------------------------------------------------------------------------------------------------------------------------------------------------------------------------------------------------------------------------------------------------------------------------------------------------------------------------------------------------------------------------------------------------------------------------------------------------------------------------------------------------------------------------------------------------------------------------------------------------------------------------------------------------------------------------------------------------------------------|
|  | <p>end of the study. This outcome is calculated at the end of the trial when all GFR data is collected. GFR data is collected at all 34 visits.</p> <p>6. Important clinical and laboratory indicators of imminent relapse by review of reported symptoms, physical signs, urinalysis and laboratory results prior to the diagnosis of a relapse. This outcome will be assessed at the end of the trial when all relapse data is collected. Those who have relapsed will have all data preceding relapse reviewed to establish a relapse profile.</p> <p>7. The costs and health outcomes (measured in terms of adverse events and quality-adjusted life years [QALYs]) for patients on standard care (not withdrawing from Eculizumab treatment) over the two-year trial duration:</p> <p>7.1. Healthcare Utilisation Questionnaires for non-withdrawal participants at Day 0, 14, 70,154, 252, 336, 504 and 672.</p> <p>7.2. Adverse Event Assessment at every visit from Day 7 (32 visits) for withdrawal participants.</p> <p>8. QALYs estimated from responses to the EQ-5D-5L, and SF-36 and determinants of QALYs/utilities over the 24-month follow-up period. at Day 0, 14, 70,154, 252, 336, 504 and 672.</p> <p>9. Model-based estimate of the costs and health consequences, with results presented in terms of cost per QALY gained, over the estimated lifetime of patients withdrawing from treatment compared with standard care.</p> |
|--|-------------------------------------------------------------------------------------------------------------------------------------------------------------------------------------------------------------------------------------------------------------------------------------------------------------------------------------------------------------------------------------------------------------------------------------------------------------------------------------------------------------------------------------------------------------------------------------------------------------------------------------------------------------------------------------------------------------------------------------------------------------------------------------------------------------------------------------------------------------------------------------------------------------------------------------------------------------------------------------------------------------------------------------------------------------------------------------------------------------------------------------------------------------------------------------------------------------------------------------------------------------------------------------------------------------------------------------------------------------------------------------------------------------------------------------------------------|

review only

# Reporting checklist for protocol of a clinical trial.

Based on the SPIRIT guidelines.

## Instructions to authors

Complete this checklist by entering the page numbers from your manuscript where readers will find each of the items listed below.

Your article may not currently address all the items on the checklist. Please modify your text to include the missing information. If you are certain that an item does not apply, please write "n/a" and provide a short explanation.

Upload your completed checklist as an extra file when you submit to a journal.

In your methods section, say that you used the SPIRIT reporting guidelines, and cite them as:

Chan A-W, Tetzlaff JM, Gøtzsche PC, Altman DG, Mann H, Berlin J, Dickersin K, Hróbjartsson A, Schulz KF, Parulekar WR, Krleža-Jerić K, Laupacis A, Moher D. SPIRIT 2013 Explanation and Elaboration: Guidance for protocols of clinical trials. *BMJ*. 2013;346:e7586

|                                   |                     | Reporting Item                                                                                               | Page Number                  |
|-----------------------------------|---------------------|--------------------------------------------------------------------------------------------------------------|------------------------------|
| <b>Administrative information</b> |                     |                                                                                                              |                              |
| Title                             | <a href="#">#1</a>  | Descriptive title identifying the study design, population, interventions, and, if applicable, trial acronym | 1                            |
| Trial registration                | <a href="#">#2a</a> | Trial identifier and registry name. If not yet registered, name of intended registry                         | 3                            |
| Trial registration: data set      | <a href="#">#2b</a> | All items from the World Health Organization Trial Registration Data Set                                     | 3, 4, 6, 7, 8, 9, 13, 16, 20 |
| Protocol version                  | <a href="#">#3</a>  | Date and version identifier                                                                                  | 3                            |
| Funding                           | <a href="#">#4</a>  | Sources and types of financial, material, and other support                                                  | 16                           |



|    |                     |                     |                                    |                                       |
|----|---------------------|---------------------|------------------------------------|---------------------------------------|
| 1  | Roles and           | <a href="#">#5a</a> | Names, affiliations, and roles of  | 1                                     |
| 2  | responsibilities:   |                     | protocol contributors              |                                       |
| 3  | contributorship     |                     |                                    |                                       |
| 4  |                     |                     |                                    |                                       |
| 5  |                     |                     |                                    |                                       |
| 6  | Roles and           | <a href="#">#5b</a> | Name and contact information for   | 13 and 17                             |
| 7  | responsibilities:   |                     | the trial sponsor                  |                                       |
| 8  | sponsor contact     |                     |                                    |                                       |
| 9  | information         |                     |                                    |                                       |
| 10 |                     |                     |                                    |                                       |
| 11 |                     |                     |                                    |                                       |
| 12 |                     |                     |                                    |                                       |
| 13 | Roles and           | <a href="#">#5c</a> | Role of study sponsor and          | NA – sponsor and funder do not        |
| 14 | responsibilities:   |                     | funders, if any, in study design;  | have involvement in these activities. |
| 15 | sponsor and         |                     | collection, management,            |                                       |
| 16 | funder              |                     | analysis, and interpretation of    |                                       |
| 17 |                     |                     | data; writing of the report; and   |                                       |
| 18 |                     |                     | the decision to submit the report  |                                       |
| 19 |                     |                     | for publication, including whether |                                       |
| 20 |                     |                     | they will have ultimate authority  |                                       |
| 21 |                     |                     | over any of these activities       |                                       |
| 22 |                     |                     |                                    |                                       |
| 23 |                     |                     |                                    |                                       |
| 24 |                     |                     |                                    |                                       |
| 25 |                     |                     |                                    |                                       |
| 26 |                     |                     |                                    |                                       |
| 27 | Roles and           | <a href="#">#5d</a> | Composition, roles, and            | 11, 12 and 13                         |
| 28 | responsibilities:   |                     | responsibilities of the            |                                       |
| 29 | committees          |                     | coordinating centre, steering      |                                       |
| 30 |                     |                     | committee, endpoint adjudication   |                                       |
| 31 |                     |                     | committee, data management         |                                       |
| 32 |                     |                     | team, and other individuals or     |                                       |
| 33 |                     |                     | groups overseeing the trial, if    |                                       |
| 34 |                     |                     | applicable (see Item 21a for data  |                                       |
| 35 |                     |                     | monitoring committee)              |                                       |
| 36 |                     |                     |                                    |                                       |
| 37 |                     |                     |                                    |                                       |
| 38 |                     |                     |                                    |                                       |
| 39 |                     |                     |                                    |                                       |
| 40 |                     |                     |                                    |                                       |
| 41 |                     |                     |                                    |                                       |
| 42 | <b>Introduction</b> |                     |                                    |                                       |
| 43 |                     |                     |                                    |                                       |
| 44 | Background and      | <a href="#">#6a</a> | Description of research question   | 4                                     |
| 45 | rationale           |                     | and justification for undertaking  |                                       |
| 46 |                     |                     | the trial, including summary of    |                                       |
| 47 |                     |                     | relevant studies (published and    |                                       |
| 48 |                     |                     | unpublished) examining benefits    |                                       |
| 49 |                     |                     | and harms for each intervention    |                                       |
| 50 |                     |                     |                                    |                                       |
| 51 |                     |                     |                                    |                                       |
| 52 |                     |                     |                                    |                                       |
| 53 |                     |                     |                                    |                                       |
| 54 | Background and      | <a href="#">#6b</a> | Explanation for choice of          | n/a – the trial withdraws patients    |
| 55 | rationale: choice   |                     | comparators                        | from their current medication, no     |
| 56 | of comparators      |                     |                                    | comparator required                   |
| 57 |                     |                     |                                    |                                       |
| 58 |                     |                     |                                    |                                       |
| 59 |                     |                     |                                    |                                       |
| 60 |                     |                     |                                    |                                       |

|    |                       |                      |                                        |         |
|----|-----------------------|----------------------|----------------------------------------|---------|
| 1  | Objectives            | <a href="#">#7</a>   | Specific objectives or hypotheses      | 4 and 5 |
| 2  |                       |                      |                                        |         |
| 3  | Trial design          | <a href="#">#8</a>   | Description of trial design            | 4       |
| 4  |                       |                      | including type of trial (eg, parallel  |         |
| 5  |                       |                      | group, crossover, factorial, single    |         |
| 6  |                       |                      | group), allocation ratio, and          |         |
| 7  |                       |                      | framework (eg, superiority,            |         |
| 8  |                       |                      | equivalence, non-inferiority,          |         |
| 9  |                       |                      | exploratory)                           |         |
| 10 |                       |                      |                                        |         |
| 11 |                       |                      |                                        |         |
| 12 |                       |                      |                                        |         |
| 13 |                       |                      |                                        |         |
| 14 | <b>Methods:</b>       |                      |                                        |         |
| 15 | <b>Participants,</b>  |                      |                                        |         |
| 16 | <b>interventions,</b> |                      |                                        |         |
| 17 | <b>and outcomes</b>   |                      |                                        |         |
| 18 |                       |                      |                                        |         |
| 19 |                       |                      |                                        |         |
| 20 |                       |                      |                                        |         |
| 21 | Study setting         | <a href="#">#9</a>   | Description of study settings (eg,     | 6       |
| 22 |                       |                      | community clinic, academic             |         |
| 23 |                       |                      | hospital) and list of countries        |         |
| 24 |                       |                      | where data will be collected.          |         |
| 25 |                       |                      | Reference to where list of study       |         |
| 26 |                       |                      | sites can be obtained                  |         |
| 27 |                       |                      |                                        |         |
| 28 |                       |                      |                                        |         |
| 29 |                       |                      |                                        |         |
| 30 |                       |                      |                                        |         |
| 31 | Eligibility criteria  | <a href="#">#10</a>  | Inclusion and exclusion criteria       | 6       |
| 32 |                       |                      | for participants. If applicable,       |         |
| 33 |                       |                      | eligibility criteria for study centres |         |
| 34 |                       |                      | and individuals who will perform       |         |
| 35 |                       |                      | the interventions (eg, surgeons,       |         |
| 36 |                       |                      | psychotherapists)                      |         |
| 37 |                       |                      |                                        |         |
| 38 |                       |                      |                                        |         |
| 39 |                       |                      |                                        |         |
| 40 |                       |                      |                                        |         |
| 41 | Interventions:        | <a href="#">#11a</a> | Interventions for each group with      | 7       |
| 42 | description           |                      | sufficient detail to allow             |         |
| 43 |                       |                      | replication, including how and         |         |
| 44 |                       |                      | when they will be administered         |         |
| 45 |                       |                      |                                        |         |
| 46 |                       |                      |                                        |         |
| 47 |                       |                      |                                        |         |
| 48 | Interventions:        | <a href="#">#11b</a> | Criteria for discontinuing or          | 9       |
| 49 | modifications         |                      | modifying allocated interventions      |         |
| 50 |                       |                      | for a given trial participant (eg,     |         |
| 51 |                       |                      | drug dose change in response to        |         |
| 52 |                       |                      | harms, participant request, or         |         |
| 53 |                       |                      | improving / worsening disease)         |         |
| 54 |                       |                      |                                        |         |
| 55 |                       |                      |                                        |         |
| 56 |                       |                      |                                        |         |
| 57 |                       |                      |                                        |         |
| 58 |                       |                      |                                        |         |
| 59 |                       |                      |                                        |         |
| 60 |                       |                      |                                        |         |

|    |                  |                      |                                    |                                   |
|----|------------------|----------------------|------------------------------------|-----------------------------------|
| 1  | Interventions:   | <a href="#">#11c</a> | Strategies to improve adherence    | 9 – monitoring of home urinalysis |
| 2  | adherence        |                      | to intervention protocols, and any |                                   |
| 3  |                  |                      | procedures for monitoring          |                                   |
| 4  |                  |                      | adherence (eg, drug tablet return; |                                   |
| 5  |                  |                      | laboratory tests)                  |                                   |
| 6  |                  |                      |                                    |                                   |
| 7  |                  |                      |                                    |                                   |
| 8  |                  |                      |                                    |                                   |
| 9  | Interventions:   | <a href="#">#11d</a> | Relevant concomitant care and      | 7 – relating to meningococcal     |
| 10 | concomitant care |                      | interventions that are permitted   | prophylaxis. No other concomitant |
| 11 |                  |                      | or prohibited during the trial     | medication requirements imposed   |
| 12 |                  |                      |                                    | by the trial                      |
| 13 |                  |                      |                                    |                                   |
| 14 |                  |                      |                                    |                                   |
| 15 |                  |                      |                                    |                                   |
| 16 | Outcomes         | <a href="#">#12</a>  | Primary, secondary, and other      | 5                                 |
| 17 |                  |                      | outcomes, including the specific   |                                   |
| 18 |                  |                      | measurement variable (eg,          |                                   |
| 19 |                  |                      | systolic blood pressure), analysis |                                   |
| 20 |                  |                      | metric (eg, change from baseline,  |                                   |
| 21 |                  |                      | final value, time to event),       |                                   |
| 22 |                  |                      | method of aggregation (eg,         |                                   |
| 23 |                  |                      | median, proportion), and time      |                                   |
| 24 |                  |                      | point for each outcome.            |                                   |
| 25 |                  |                      | Explanation of the clinical        |                                   |
| 26 |                  |                      | relevance of chosen efficacy and   |                                   |
| 27 |                  |                      | harm outcomes is strongly          |                                   |
| 28 |                  |                      | recommended                        |                                   |
| 29 |                  |                      |                                    |                                   |
| 30 |                  |                      |                                    |                                   |
| 31 |                  |                      |                                    |                                   |
| 32 |                  |                      |                                    |                                   |
| 33 |                  |                      |                                    |                                   |
| 34 |                  |                      |                                    |                                   |
| 35 |                  |                      |                                    |                                   |
| 36 | Participant      | <a href="#">#13</a>  | Time schedule of enrolment,        | 7                                 |
| 37 | timeline         |                      | interventions (including any run-  |                                   |
| 38 |                  |                      | ins and washouts), assessments,    |                                   |
| 39 |                  |                      | and visits for participants. A     |                                   |
| 40 |                  |                      | schematic diagram is highly        |                                   |
| 41 |                  |                      | recommended (see Figure)           |                                   |
| 42 |                  |                      |                                    |                                   |
| 43 |                  |                      |                                    |                                   |
| 44 |                  |                      |                                    |                                   |
| 45 |                  |                      |                                    |                                   |
| 46 | Sample size      | <a href="#">#14</a>  | Estimated number of participants   | 6 and 10                          |
| 47 |                  |                      | needed to achieve study            |                                   |
| 48 |                  |                      | objectives and how it was          |                                   |
| 49 |                  |                      | determined, including clinical and |                                   |
| 50 |                  |                      | statistical assumptions            |                                   |
| 51 |                  |                      | supporting any sample size         |                                   |
| 52 |                  |                      | calculations                       |                                   |
| 53 |                  |                      |                                    |                                   |
| 54 |                  |                      |                                    |                                   |
| 55 |                  |                      |                                    |                                   |
| 56 |                  |                      |                                    |                                   |
| 57 |                  |                      |                                    |                                   |
| 58 |                  |                      |                                    |                                   |
| 59 |                  |                      |                                    |                                   |
| 60 |                  |                      |                                    |                                   |

|    |                        |                      |                                     |                          |
|----|------------------------|----------------------|-------------------------------------|--------------------------|
| 1  | Recruitment            | <a href="#">#15</a>  | Strategies for achieving adequate   | 6                        |
| 2  |                        |                      | participant enrolment to reach      |                          |
| 3  |                        |                      | target sample size                  |                          |
| 4  |                        |                      |                                     |                          |
| 5  |                        |                      |                                     |                          |
| 6  | <b>Methods:</b>        |                      |                                     |                          |
| 7  |                        |                      |                                     |                          |
| 8  | <b>Assignment of</b>   |                      |                                     |                          |
| 9  | <b>interventions</b>   |                      |                                     |                          |
| 10 | <b>(for controlled</b> |                      |                                     |                          |
| 11 | <b>trials)</b>         |                      |                                     |                          |
| 12 |                        |                      |                                     |                          |
| 13 |                        |                      |                                     |                          |
| 14 | Allocation:            | <a href="#">#16a</a> | Method of generating the            | NA- non-randomised trial |
| 15 | sequence               |                      | allocation sequence (eg,            |                          |
| 16 | generation             |                      | computer-generated random           |                          |
| 17 |                        |                      | numbers), and list of any factors   |                          |
| 18 |                        |                      | for stratification. To reduce       |                          |
| 19 |                        |                      | predictability of a random          |                          |
| 20 |                        |                      | sequence, details of any planned    |                          |
| 21 |                        |                      | restriction (eg, blocking) should   |                          |
| 22 |                        |                      | be provided in a separate           |                          |
| 23 |                        |                      | document that is unavailable to     |                          |
| 24 |                        |                      | those who enrol participants or     |                          |
| 25 |                        |                      | assign interventions                |                          |
| 26 |                        |                      |                                     |                          |
| 27 |                        |                      |                                     |                          |
| 28 |                        |                      |                                     |                          |
| 29 |                        |                      |                                     |                          |
| 30 |                        |                      |                                     |                          |
| 31 |                        |                      |                                     |                          |
| 32 |                        |                      |                                     |                          |
| 33 | Allocation             | <a href="#">#16b</a> | Mechanism of implementing the       | NA- non-blinded          |
| 34 | concealment            |                      | allocation sequence (eg, central    |                          |
| 35 | mechanism              |                      | telephone; sequentially             |                          |
| 36 |                        |                      | numbered, opaque, sealed            |                          |
| 37 |                        |                      | envelopes), describing any steps    |                          |
| 38 |                        |                      | to conceal the sequence until       |                          |
| 39 |                        |                      | interventions are assigned          |                          |
| 40 |                        |                      |                                     |                          |
| 41 |                        |                      |                                     |                          |
| 42 |                        |                      |                                     |                          |
| 43 |                        |                      |                                     |                          |
| 44 | Allocation:            | <a href="#">#16c</a> | Who will generate the allocation    | NA- non-randomised trial |
| 45 | implementation         |                      | sequence, who will enrol            |                          |
| 46 |                        |                      | participants, and who will assign   |                          |
| 47 |                        |                      | participants to interventions       |                          |
| 48 |                        |                      |                                     |                          |
| 49 |                        |                      |                                     |                          |
| 50 |                        |                      |                                     |                          |
| 51 | Blinding               | <a href="#">#17a</a> | Who will be blinded after           | N/A – non-blinded        |
| 52 | (masking)              |                      | assignment to interventions (eg,    |                          |
| 53 |                        |                      | trial participants, care providers, |                          |
| 54 |                        |                      | outcome assessors, data             |                          |
| 55 |                        |                      | analysts), and how                  |                          |
| 56 |                        |                      |                                     |                          |
| 57 |                        |                      |                                     |                          |
| 58 |                        |                      |                                     |                          |
| 59 |                        |                      |                                     |                          |
| 60 |                        |                      |                                     |                          |

|                                                                                                                      |                                                           |                      |                                                                                                                                                                                                                                                                                                                                                                                                              |                  |
|----------------------------------------------------------------------------------------------------------------------|-----------------------------------------------------------|----------------------|--------------------------------------------------------------------------------------------------------------------------------------------------------------------------------------------------------------------------------------------------------------------------------------------------------------------------------------------------------------------------------------------------------------|------------------|
| 1<br>2<br>3<br>4<br>5<br>6<br>7<br>8                                                                                 | Blinding<br>(masking):<br>emergency<br>unblinding         | <a href="#">#17b</a> | If blinded, circumstances under which unblinding is permissible, and procedure for revealing a participant's allocated intervention during the trial                                                                                                                                                                                                                                                         | NA – non-blinded |
| 9<br>10<br>11<br>12<br>13<br>14<br>15                                                                                | <b>Methods: Data collection, management, and analysis</b> |                      |                                                                                                                                                                                                                                                                                                                                                                                                              |                  |
| 16<br>17<br>18<br>19<br>20<br>21<br>22<br>23<br>24<br>25<br>26<br>27<br>28<br>29<br>30<br>31<br>32<br>33<br>34<br>35 | Data collection plan                                      | <a href="#">#18a</a> | Plans for assessment and collection of outcome, baseline, and other trial data, including any related processes to promote data quality (eg, duplicate measurements, training of assessors) and a description of study instruments (eg, questionnaires, laboratory tests) along with their reliability and validity, if known. Reference to where data collection forms can be found, if not in the protocol | 7                |
| 36<br>37<br>38<br>39<br>40<br>41<br>42<br>43<br>44<br>45                                                             | Data collection plan: retention                           | <a href="#">#18b</a> | Plans to promote participant retention and complete follow-up, including list of any outcome data to be collected for participants who discontinue or deviate from intervention protocols                                                                                                                                                                                                                    | 9, 12 and 13     |
| 46<br>47<br>48<br>49<br>50<br>51<br>52<br>53<br>54<br>55<br>56<br>57<br>58<br>59<br>60                               | Data management                                           | <a href="#">#19</a>  | Plans for data entry, coding, security, and storage, including any related processes to promote data quality (eg, double data entry; range checks for data values). Reference to where details of data management procedures can be found, if not in the protocol                                                                                                                                            | 13               |

|    |                      |                      |                                     |               |
|----|----------------------|----------------------|-------------------------------------|---------------|
| 1  | Statistics:          | <a href="#">#20a</a> | Statistical methods for analysing   | 10, 12 and 13 |
| 2  | outcomes             |                      | primary and secondary               |               |
| 3  |                      |                      | outcomes. Reference to where        |               |
| 4  |                      |                      | other details of the statistical    |               |
| 5  |                      |                      | analysis plan can be found, if not  |               |
| 6  |                      |                      | in the protocol                     |               |
| 7  |                      |                      |                                     |               |
| 8  |                      |                      |                                     |               |
| 9  |                      |                      |                                     |               |
| 10 | Statistics:          | <a href="#">#20b</a> | Methods for any additional          | 12 and 13     |
| 11 | additional           |                      | analyses (eg, subgroup and          |               |
| 12 | analyses             |                      | adjusted analyses)                  |               |
| 13 |                      |                      |                                     |               |
| 14 |                      |                      |                                     |               |
| 15 |                      |                      |                                     |               |
| 16 | Statistics: analysis | <a href="#">#20c</a> | Definition of analysis population   | 12            |
| 17 | population and       |                      | relating to protocol non-           |               |
| 18 | missing data         |                      | adherence (eg, as randomised        |               |
| 19 |                      |                      | analysis), and any statistical      |               |
| 20 |                      |                      | methods to handle missing data      |               |
| 21 |                      |                      | (eg, multiple imputation)           |               |
| 22 |                      |                      |                                     |               |
| 23 |                      |                      |                                     |               |
| 24 |                      |                      |                                     |               |
| 25 |                      |                      |                                     |               |
| 26 | <b>Methods:</b>      |                      |                                     |               |
| 27 | <b>Monitoring</b>    |                      |                                     |               |
| 28 |                      |                      |                                     |               |
| 29 |                      |                      |                                     |               |
| 30 | Data monitoring:     | <a href="#">#21a</a> | Composition of data monitoring      | 11,12 and 13  |
| 31 | formal committee     |                      | committee (DMC); summary of its     |               |
| 32 |                      |                      | role and reporting structure;       |               |
| 33 |                      |                      | statement of whether it is          |               |
| 34 |                      |                      | independent from the sponsor        |               |
| 35 |                      |                      | and competing interests; and        |               |
| 36 |                      |                      | reference to where further details  |               |
| 37 |                      |                      | about its charter can be found, if  |               |
| 38 |                      |                      | not in the protocol. Alternatively, |               |
| 39 |                      |                      | an explanation of why a DMC is      |               |
| 40 |                      |                      | not needed                          |               |
| 41 |                      |                      |                                     |               |
| 42 |                      |                      |                                     |               |
| 43 |                      |                      |                                     |               |
| 44 |                      |                      |                                     |               |
| 45 |                      |                      |                                     |               |
| 46 |                      |                      |                                     |               |
| 47 | Data monitoring:     | <a href="#">#21b</a> | Description of any interim          | 11 and 12     |
| 48 | interim analysis     |                      | analyses and stopping               |               |
| 49 |                      |                      | guidelines, including who will      |               |
| 50 |                      |                      | have access to these interim        |               |
| 51 |                      |                      | results and make the final          |               |
| 52 |                      |                      | decision to terminate the trial     |               |
| 53 |                      |                      |                                     |               |
| 54 |                      |                      |                                     |               |
| 55 |                      |                      |                                     |               |
| 56 |                      |                      |                                     |               |
| 57 | Harms                | <a href="#">#22</a>  | Plans for collecting, assessing,    | 9 and 10      |
| 58 |                      |                      | reporting, and managing solicited   |               |
| 59 |                      |                      |                                     |               |
| 60 |                      |                      |                                     |               |

|    |                      |                      |                                       |    |
|----|----------------------|----------------------|---------------------------------------|----|
| 1  |                      |                      | and spontaneously reported            |    |
| 2  |                      |                      | adverse events and other              |    |
| 3  |                      |                      | unintended effects of trial           |    |
| 4  |                      |                      | interventions or trial conduct        |    |
| 5  |                      |                      |                                       |    |
| 6  |                      |                      |                                       |    |
| 7  | Auditing             | <a href="#">#23</a>  | Frequency and procedures for          | 13 |
| 8  |                      |                      | auditing trial conduct, if any, and   |    |
| 9  |                      |                      | whether the process will be           |    |
| 10 |                      |                      | independent from investigators        |    |
| 11 |                      |                      | and the sponsor                       |    |
| 12 |                      |                      |                                       |    |
| 13 |                      |                      |                                       |    |
| 14 |                      |                      |                                       |    |
| 15 | <b>Ethics and</b>    |                      |                                       |    |
| 16 | <b>dissemination</b> |                      |                                       |    |
| 17 |                      |                      |                                       |    |
| 18 |                      |                      |                                       |    |
| 19 | Research ethics      | <a href="#">#24</a>  | Plans for seeking research ethics     | 14 |
| 20 | approval             |                      | committee / institutional review      |    |
| 21 |                      |                      | board (REC / IRB) approval            |    |
| 22 |                      |                      |                                       |    |
| 23 |                      |                      |                                       |    |
| 24 | Protocol             | <a href="#">#25</a>  | Plans for communicating               | 13 |
| 25 | amendments           |                      | important protocol modifications      |    |
| 26 |                      |                      | (eg, changes to eligibility criteria, |    |
| 27 |                      |                      | outcomes, analyses) to relevant       |    |
| 28 |                      |                      | parties (eg, investigators, REC /     |    |
| 29 |                      |                      | IRBs, trial participants, trial       |    |
| 30 |                      |                      | registries, journals, regulators)     |    |
| 31 |                      |                      |                                       |    |
| 32 |                      |                      |                                       |    |
| 33 |                      |                      |                                       |    |
| 34 |                      |                      |                                       |    |
| 35 |                      |                      |                                       |    |
| 36 | Consent or assent    | <a href="#">#26a</a> | Who will obtain informed consent      | 7  |
| 37 |                      |                      | or assent from potential trial        |    |
| 38 |                      |                      | participants or authorised            |    |
| 39 |                      |                      | surrogates, and how (see Item         |    |
| 40 |                      |                      | 32)                                   |    |
| 41 |                      |                      |                                       |    |
| 42 |                      |                      |                                       |    |
| 43 |                      |                      |                                       |    |
| 44 | Consent or           | <a href="#">#26b</a> | Additional consent provisions for     | 7  |
| 45 | assent: ancillary    |                      | collection and use of participant     |    |
| 46 | studies              |                      | data and biological specimens in      |    |
| 47 |                      |                      | ancillary studies, if applicable      |    |
| 48 |                      |                      |                                       |    |
| 49 |                      |                      |                                       |    |
| 50 |                      |                      |                                       |    |
| 51 | Confidentiality      | <a href="#">#27</a>  | How personal information about        | 13 |
| 52 |                      |                      | potential and enrolled                |    |
| 53 |                      |                      | participants will be collected,       |    |
| 54 |                      |                      | shared, and maintained in order       |    |
| 55 |                      |                      | to protect confidentiality before,    |    |
| 56 |                      |                      | during, and after the trial           |    |
| 57 |                      |                      |                                       |    |
| 58 |                      |                      |                                       |    |
| 59 |                      |                      |                                       |    |
| 60 |                      |                      |                                       |    |

|    |                       |                      |                                      |                                                                              |
|----|-----------------------|----------------------|--------------------------------------|------------------------------------------------------------------------------|
| 1  | Declaration of        | <a href="#">#28</a>  | Financial and other competing        | 16                                                                           |
| 2  | interests             |                      | interests for principal              |                                                                              |
| 3  |                       |                      | investigators for the overall trial  |                                                                              |
| 4  |                       |                      | and each study site                  |                                                                              |
| 5  |                       |                      |                                      |                                                                              |
| 6  |                       |                      |                                      |                                                                              |
| 7  |                       |                      |                                      |                                                                              |
| 8  | Data access           | <a href="#">#29</a>  | Statement of who will have           | 13                                                                           |
| 9  |                       |                      | access to the final trial dataset,   |                                                                              |
| 10 |                       |                      | and disclosure of contractual        |                                                                              |
| 11 |                       |                      | agreements that limit such           |                                                                              |
| 12 |                       |                      | access for investigators             |                                                                              |
| 13 |                       |                      |                                      |                                                                              |
| 14 |                       |                      |                                      |                                                                              |
| 15 |                       |                      |                                      |                                                                              |
| 16 | Ancillary and post    | <a href="#">#30</a>  | Provisions, if any, for ancillary    | 7 – post trial safety monitoring                                             |
| 17 | trial care            |                      | and post-trial care, and for         |                                                                              |
| 18 |                       |                      | compensation to those who            |                                                                              |
| 19 |                       |                      | suffer harm from trial participation |                                                                              |
| 20 |                       |                      |                                      |                                                                              |
| 21 |                       |                      |                                      |                                                                              |
| 22 |                       |                      |                                      |                                                                              |
| 23 | Dissemination         | <a href="#">#31a</a> | Plans for investigators and          | 14                                                                           |
| 24 | policy: trial results |                      | sponsor to communicate trial         |                                                                              |
| 25 |                       |                      | results to participants, healthcare  |                                                                              |
| 26 |                       |                      | professionals, the public, and       |                                                                              |
| 27 |                       |                      | other relevant groups (eg, via       |                                                                              |
| 28 |                       |                      | publication, reporting in results    |                                                                              |
| 29 |                       |                      | databases, or other data sharing     |                                                                              |
| 30 |                       |                      | arrangements), including any         |                                                                              |
| 31 |                       |                      | publication restrictions             |                                                                              |
| 32 |                       |                      |                                      |                                                                              |
| 33 |                       |                      |                                      |                                                                              |
| 34 |                       |                      |                                      |                                                                              |
| 35 |                       |                      |                                      |                                                                              |
| 36 |                       |                      |                                      |                                                                              |
| 37 | Dissemination         | <a href="#">#31b</a> | Authorship eligibility guidelines    | 16                                                                           |
| 38 | policy: authorship    |                      | and any intended use of              |                                                                              |
| 39 |                       |                      | professional writers                 |                                                                              |
| 40 |                       |                      |                                      |                                                                              |
| 41 |                       |                      |                                      |                                                                              |
| 42 |                       |                      |                                      |                                                                              |
| 43 | Dissemination         | <a href="#">#31c</a> | Plans, if any, for granting public   | 13                                                                           |
| 44 | policy:               |                      | access to the full protocol,         |                                                                              |
| 45 | reproducible          |                      | participant-level dataset, and       |                                                                              |
| 46 | research              |                      | statistical code                     |                                                                              |
| 47 |                       |                      |                                      |                                                                              |
| 48 |                       |                      |                                      |                                                                              |
| 49 | <b>Appendices</b>     |                      |                                      |                                                                              |
| 50 |                       |                      |                                      |                                                                              |
| 51 |                       |                      |                                      |                                                                              |
| 52 | Informed consent      | <a href="#">#32</a>  | Model consent form and other         | N/A – not included but can be                                                |
| 53 | materials             |                      | related documentation given to       | requested from the Trial Manager                                             |
| 54 |                       |                      | participants and authorised          | Sarah Dunn                                                                   |
| 55 |                       |                      | surrogates                           | <a href="mailto:sarah.dunn2@newcastle.ac.uk">sarah.dunn2@newcastle.ac.uk</a> |
| 56 |                       |                      |                                      |                                                                              |
| 57 |                       |                      |                                      |                                                                              |
| 58 |                       |                      |                                      |                                                                              |
| 59 |                       |                      |                                      |                                                                              |
| 60 |                       |                      |                                      |                                                                              |



|                                           |                         |                                                                                                                                                                                                                                   |                                                                                                                                                                                |
|-------------------------------------------|-------------------------|-----------------------------------------------------------------------------------------------------------------------------------------------------------------------------------------------------------------------------------|--------------------------------------------------------------------------------------------------------------------------------------------------------------------------------|
| 1<br>2<br>3<br>4<br>5<br>6<br>7<br>8<br>9 | Biological<br>specimens | <a href="#">#33</a> Plans for collection, laboratory<br>evaluation, and storage of<br>biological specimens for genetic<br>or molecular analysis in the<br>current trial and for future use in<br>ancillary studies, if applicable | N/A – not included, laboratory<br>manual can be requested from the<br>Trial Manager Sarah Dunn<br><a href="mailto:sarah.dunn2@newcastle.ac.uk">sarah.dunn2@newcastle.ac.uk</a> |
|-------------------------------------------|-------------------------|-----------------------------------------------------------------------------------------------------------------------------------------------------------------------------------------------------------------------------------|--------------------------------------------------------------------------------------------------------------------------------------------------------------------------------|

10  
11 None The SPIRIT Explanation and Elaboration paper is distributed under the terms of the Creative  
12 Commons Attribution License CC-BY-NC. This checklist can be completed online using  
13 <https://www.goodreports.org/>, a tool made by the [EQUATOR Network](#) in collaboration with  
14 [Penelope.ai](#)  
15  
16  
17  
18  
19  
20  
21  
22  
23  
24  
25  
26  
27  
28  
29  
30  
31  
32  
33  
34  
35  
36  
37  
38  
39  
40  
41  
42  
43  
44  
45  
46  
47  
48  
49  
50  
51  
52  
53  
54  
55  
56  
57  
58  
59  
60
