# Supplementary material for: Safety and impact of eculizumab withdrawal in patients with atypical haemolytic uraemic syndrome: protocol for a multicentre, open-label, prospective, single-arm study
Source: PubMed Central journal article supplement (PMC9486193; doi:10.1136/bmjopen-2021-054536), 2022-09-19
Supplement: bmjopen-2021-054536supp002.pdf [file bmjopen-2021-054536supp002.pdf]

# SETS aHUS: Stopping Eculizumab Treatment Safely in aHUS

The holder of this card has a rare disease known as atypical Haemolytic Uraemic Syndrome and is taking part in a clinical trial to assess the safe withdrawal of Eculizumab treatment. Because of this, the holder of this card may suffer a relapse.

If the holder presents unwell, however minor the illness, please evaluate immediately and obtain the following Laboratory investigations as their Eculizumab treatment and prophylactic antibiotics may need to be re-started as soon as possible and within 24hrs:

- U&E • FBC • LDH

If the results are abnormal, immediately contact the local medical team and refer to the UK National aHUS Service website for advice. Contact details on reverse side.

# SETS aHUS: Stopping Eculizumab Treatment Safely in aHUS

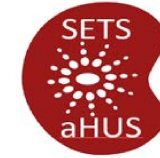

**Patients Local Medical team: +44 (0).....**

**UK National aHUS Service: +44 (0)191 2820385**

**(from 9am to 5pm GMT)**

**Outside of these hours, please contact the Newcastle Hospitals Switchboard and request to speak to the clinician on call for the aHUS Service on +44 (0)191 233 6161**

**[www.atypicalhus.co.uk](http://www.atypicalhus.co.uk)**
